# Supplementary material for: Identification of the Major Effector StSROs in Potato: A Potential StWRKY-SRO6 Regulatory Pathway Enhances Plant Tolerance to Cadmium Stress
Source: Int J Mol Sci. 2022 Nov 18;23(22):14318. doi: 10.3390/ijms232214318 (PMC9698690; doi:10.3390/ijms232214318)
Supplement: Supplementary file 1 [file ijms-23-14318-s001.zip › Supplementary Tables S1-S13.xlsx]

## Sheet: Summary
Supplementary Materials
Identification of the Major Effector StSRO in Potato: A Potential StWRKY-SRO6 Regulatory Pathway Enhances Plant Tolerance to Cadmium Stress
Yeqing He 1, Guandi He 1, *, Weijun Tian 2, Fei Lou 1, Zheng Zhou 1, Yao Liu 1, Yule Zhang 1, Tengbing He 1, 3, *
1 College of Agricultural, Guizhou University, Guiyang 550025, China
2 Institute of Geochemistry, Chinese Academy of Sciences, Guiyang 550081, China
3 Institute of New Rural Development of Guizhou University, Guiyang 550025, China
* Correspondence: gdhe@gzu.edu.cn; tbhe@gzu.edu.cn
Supplementary Tables
Table S1 Protein sequences of SRO genes from different species
Table S2 qRT-PCR primers for expression analysis of StSRO genes family in Solanum tuberosum
Table S3 Biophysical characteristics and subcellular localization of SRO genes in Solanum tuberosum
Table S4 Gene pairs with interspecies collinearity
Table S5 The protein sequence used to construct the evolutionary tree
Table S6 Multispecies_gene_exon_info
Table S7 Motifs sequences of the SRO genes
Table S8 Exon information of SRO genes
Table S9 qRT-PCR data of StSRO genes in different heavy metal exposure (raw data list and statistical analysis)
Table S10 Predicted interaction relationships between SRO genes and proteins
Table S11 Predicted Interaction Relationships Between SRO genes and microRNA
Table S12a Abiotic stress-related cis-acting elements in the promoter region of StSRO genes (Original data)
Table S12b Statistics of the number of different cis-acting elements
Table S12c Statistics of the number of light-responsive elements
Table S12d Statistics of the number of growth responsive elements
Table S12e Statistics of the number of stress-responsive elements
Table S13a Summary of quantitative real-time polymerase chain reaction results of StWRKY6 with StSRO5/6 (Soil culture seedlings)
Table S13b Summary of quantitative real-time polymerase chain reaction results of StWRKY6 with StSRO5/6 (Tissue culture seedling)

## Sheet: Table S1
Table S1 Protein sequences of SRO genes from different species
Species	Genename	GeneID	TranscriptID	Proteinsequence
Solanumtuberosum	StSRO1	PGSC0003DMG400024600	PGSC0003DMT400063250	MENFVKPQFFSFLREEAAAAVQRYSPHHKFMAHSGFGNQFAESTSSSADDVQDPEVSDSESSVVGSVHEERSSGLMRIDEGDKIYGIISNKFLSGLGCFGLSTEITAIHKETCSSFIKQAKLQSFLIFSKAVEKKCGGNANVKYAWFGASNDEINNIFSHGFSHSSNGAYSQAICLSPDDNSHDCLQAAVPDKNGVRHLLLCRVILGKTEVVHPGSGQCHPSSEEYDTGVDNLSSPRKYIVWSTHMNSYVFPEFMVSFRVSSHAKESQRNTVPVQNPKSPWITFPALISALSKFLPPQTVKLITKYHNDHKGRKITRRDLIQQVRKLAGDELLTAIIKSCKNKQQSKGSTGNSSSTSSINFEQRDGRCCACQKSC
	StSRO2	PGSC0003DMG400004959	PGSC0003DMT400012724	MSIASVGSCAPMIAGDEVDSISAVFNGNKVEIVIPFERAAGGSGDDGVYETKVRVEVPIPRNWLIPSARSTDHSQLLVQNHRNFKESGMPVRFMVFKDGSWVDFEKKAMDVLVSAFVSGEAMVEMEMEGCKLIFDFYRMIGINLDSGNELPIAWIDVGGKGFYPKVFIEGSENLDKNEVNVDEKFSSENRKIELEIKIIERNSAGDELGKRKRESEEKEVVREVGSSSRNVIEQRVVSAPTELLPPKWPRTRSLGNEEENYRKVRGLLFSVLKADVTVTAVHQCTRTGPVEQARFEVFRNNVQIVKRARGDARVGYAWYGTSLAKMDSIMWRGFQMQRIVPGYHTHGVGIYLSPLCSPQNSEMMCEIDENGEKHIMLCRVILGKLEKVELGSQQLFPSS…
	StSRO3	PGSC0003DMG400013481	PGSC0003DMT400035056	MDQLGDDDQVSMTIESREILFSSDSEVESPSPTSNCHFRSLKRNGIIKLEERDQEHDLIKAGFLSGMGQLGNEIEVVAIHKNSRSTILGQARSESFSIYSEAMRKKCGGDANIKYAWIGSSKDEICKIISHGFSTIMEPKSGDCFGNGVHLYPTNIDGVFSAVEDENGLRHMLLCRVILGNTEVIEASSKQFQPTCQDFDSGVDNYFAPKTYIIWPSNMNSHILPIFLVSFKGPLLLGNSSKIKKIPLNPTPRIKFSNLLRVLSNFLHPSRMVLISKIYEDFQVRIFIKKKLKIVTIKFITVKYFNKYLITDYMNSIYRKTRSQKWYLFRS
	StSRO4	PGSC0003DMG400013476	PGSC0003DMT400035039	MLLSFDSEAESPSPALHNSFRSFKRNGMIELEERNKEHDLIKAGFLSGMGHLGKEVEIVAIHKNSCSTILGQARLESFRIYSEAMRKKCGGNANIKYAWFGSSKDEICNIISHGFSTITEPKSGECFGIGVHLYPANIHGVLSAVEDEDGLRHMLLCRVILGNTEVIEASSKQFQPTCQDFDSGVDNYLAPKTYIIWPSNMNSHILPNFVVSYRCPSCLLGASSKIKKVSPKSNSRIKFHDLLRVLSKYLHPSRMVLISKYYEDFQKNKITKLVLIRKLRQIAGDTSLRAVMKLYPNTTI
	StSRO5	PGSC0003DMG401016766	PGSC0003DMT400043197	MEPKGVGLLDSGRRTVVGAKSKVASQNLAHLFRASSEKISIQSNCDSKLEKRKRIVDCESNCQSHLRKSVHKNYLNFKRSRLPQRVLFYQNGEWTDFPQDIIPIVKEDFQAKKAVIEVKVCDFHIILDTLHMVQIDMINGLQKPIAWIDEVGRCFFPESYLISSEMHGNFETLLKRTEEFMTTEPARITDIKLQLDIDLNGLDNRNLEEDVEESNIGYKRIKVYPPKDSQEFADYKKSDAKMEQVAENKQNQETPSPDLVASLILVNAESVENMFIMGMNVIPNKDEIKITKCSSNYLRTHLELFEKQVEITQKYRGNANVRYAWLAASKDLISTIMKYGLAPGGPKYRPKFGVGVHLSALHCAFKSAINCDADENGVHYMVFARVILGNVEPLHCGSE…
	StSRO6	PGSC0003DMG400014804	PGSC0003DMT400038368	MESNWVEVLDNDRRTADVDSKSKVASQYVARIVGAGTEKLEELSFQPNCSSFYSKLGKRKRTVEGESNCRSHLRKSTLKNYSNFIKSSGLPQRVLYHQNGEWNDFPQDIVRIVKEDFRAKKAVIEVNFGGFHVILDILYMVQVNLVTGLEKPIAWIDEAGGCFFPDLCLLSCKMHDNFEIQSQRTEEFSAAEPDRATNIKLHLEIDFNGPNNCKVDEGVEESNVRVKRIKVDPLKDNQQFAVDQKSYVAENQQDQESLSPILEDTLKLVDAESVKTMFVKGMNTICMVDIVKISQCLSKYMRNRLELFEKQVEITQKYRGNSNVRYAWLAASKEVVSTIMNYGLMHGARGQKTNLGVGVHLIAQDCASSKSAASCDIDENGIRYMVLCRVILGNEELLH…
Arabidopsisthaliana	AtRCD1	AT1G32230	AT1G32230.1	MEAKIVKVLDSSRCEDGFGKKRKRAASYAAYVTGVSCAKLQNVPPPNGQCQIPDKRRRLEGENKLSAYENRSGKALVRYYTYFKKTGIAKRVMMYENGEWNDLPEHVICAIQNELEEKSAAIEFKLCGHSFILDFLHMQRLDMETGAKTPLAWIDNAGKCFFPEIYESDERTNYCHHKCVEDPKQNAPHDIKLLEIDVNGGETPRLNLEECSDESGDNMMDDVPLAQRSSNEHYDEATEDSCSRKLEAAVSKWDETDAIVVSGAKLTGSEVLDKDAVKKMFAVGTASLGHVPVLDVGRFSSEIAEARLALFQKQVEITKKHRGDANVRYAWLPAKREVLSAVMMQGLGVGGAFIRKSIYGVGIHLTAADCPYFSARYCDVDENGVRYMVLCRVIMGNME…
	AtSRO1	AT2G35510	AT2G35510.1	MEAKIVKVSDSSYKDGLGKKRKHPGNYTPYDSGRSYAKLQWVLSPNSSTQKLEKRRNLDGENKVIVSENHVEKSLVRYFSYYKKTGVPKRVMFHENGEWIDLPDHILCDIRNDLEAKRATIEFNWCGRHFLLDFLHMYRLDLETGVKTQLAWIDIAGKCFFPETFDTLERDGCHHIRGEDPEQHDQREIKLHIEIDVNSGELPRLNLNVVTDESGDNMDDFQAVQRSSNGPNDEASEDSCSRELDDAVEKWDKTETDRFSGVKPAEEELDKDAVKQMFALGAATLGHVESLDVYQFSSEIAKARLSLFQKQADITKKHRGDANIRYAWVPMHGLGVGGAFIKKSMYGVGVHESSGLTLEGPKGSPSNEPGRVSNGGSGSEKNSSSSSRRPRSPIMPFPL…
	AtSRO2	AT1G23550	AT1G23550.1	MAAQVEIEDQTSVTNLDNGEIFDSISDDADSSVSHAGSSFSSSSLILLGEGNPEHDVIKTCLLSGMGVVSSDTTIVTISKNSSERGITTRAKFLAFRIFTDAVARKHGGDANVKYGWYAGSRDEIQRIISYGFSNRDVGKFENDGGSHGIHLVPSKCSLLAASATEQDEEGLRYLLLCRVILGKPEIIISGSKQSYPSSAEFDSGVDDLHNPRNYVIWSCNMNSCILPSYIVSFRSPRLRVSRGGFASRPSSPWVSFASLMSMLSTSMDPSRMNLIIRTYDDFRKRKIRRDQLVRKMREVAGDNLLAEIIKNHKNRNKVTN*
	AtSRO3	AT1G70440	AT1G70440.1	MAAQVEIEDQESVTNLDNGEINPISDNAPNFSGDATILLREATFEHNLIKNCFLSGMGSFATETTIVTVRKILTQRLITTKAKFAVFKLFTEAMKRKNNGYANIRYGWYSGSKEEIDRVITYGFSNREIKKVENDVGSHGVGIHLVHHRYSLAAALVGEGDEEGIKNILLCRVILGKPEQIVTGSKQSYPSSNQFDSGVDNLENPRKYVIWSCNMNSYILPTYIVSFKSHLLRGLIGRARSPCVSFSVLMSILSKSLDAARMNLILTSYDDFRKRKLRREQLVRKIREVVGDNLLFKILKNQRR*
	AtSRO4	AT3G47720	AT3G47720.1	MDYSKTEETPINEEQGSTNSSESRSNEELFSDCDQQHSSIAEFGLTELPKDDKVYELIYRHCQSKLTSHLSNQFEIVSILKNGFQTPLGQAKLKAFQIYAESVAKKSGSCCGNKAAEAARVKYGCCGVEKEELKAILMYGFSNNALCLSPDNAPLQCMIDPSSSCNEDGISFLLFSRIIMGKSEVVCSTSQSYPSSMEFDSGVDSLTSPNKYIIWSTHMNTHVLPEFVVCIKTPSILKRKNPKSPWISFPVLINSISKFLNQSQIRLIHKHYKEHQDRRISRCELIQRLRSITGDSLLVQIIKSVGQKVHKDT*
	AtSRO5	AT5G62520	AT5G62520.1	MDYVRTQVEAVFDDSEQDGSTISESGSCDSSSDRSFADELGLMELLEGDKAHDLIYRNCKSGLGDQCQILSVLRNGFRNVGSRAKLKTFQVFQEAVQMKHGGDGGAKVKYGWCSVSKHELKTIFEYGFSEPLRNDGSFGRGLYLSPDNSPLDCLKDSASESEDGMRFLLLCRVLLGKSEIVPQGSTRSCPSSPEFDSGVDDLVSTKKYIVWSTHMNTHVLPEFLVCIKAPFNLTRSPKRLRSPWMAFPVLIKALSKFLPPSQILVIQKHYKDQQNRRITRSELIQRVRSITGDKLLVHIIKACGHKVQH*
Zeamay	ZmSRO1	GRMZM2G122543	GRMZM2G122543_T01	MDLSSDDVKAANMRPAVAAADGTSTLLRGWREFMRSGAPARFLCYEDGKWIGITGEAVPQLRQAFQERRAMADASYGGKAYLFDFLRMIRIDEVTGEETGLAWIDDRGDCFFPAPDCGGRKRKRDDEPAEDEAESS​​SGVDVRSGERHGVDAKKMKAWENAAVRLEENDMYYQVVSKLFLSYGMAQRGAAITEVRKIAPGARTVAFREQGQRLAYARCTATGTAKFAWYGASEDDVAAVVERGFVRNNAPRLGARKHGDGVHLSPAQCPYTSAMLAKADGSDEAHIVLCRVLMGRPEAVPAGSSQFCPSSRSYDSAVDKLENPQWYVVWNMDMNTRILPEYVVSFKCSKLQQMRESSEATSKLKKPAPVARDMFPTLLAEIQQIVPDKCDLLQESYKN…
	ZmSRO2	GRMZM2G089147	GRMZM2G089147_T01	MRIGAGANMAACSSVPCSFPAKPDPHRRSPSGILSSHLPRLPATQFRRLRSLSAAASPPASRLRPRASVSTSPAPSKDYEFTDGNGEVELRLDIQKLGIASSKDVFVDVDDTSLLIRAKSDGTLRTLMNVQTLFDRIKSSETIWCVSII
	ZmSRO3	GRMZM2G011469	GRMZM2G011469_T01	MASPQESNSLCLKRKLVDDCLSKDCKSRRVKSENEPSSDSFAKRCNCCCTRPNLANDCVNFLKSGAPRVMYYKKGSWHNFPEQIMNSLIDEFKGNKSSVVSVMDDEPILVDFLSMTLVNLKTRKQRSVAWFDDTGKRFFPSLFFDEESDEMPKQDSGNVNNTAQGIMLDKVTSSPPEVVKQVVLESSPPVPQKPSTVDVLRKKITSVERGSEGFLFVQDLFLSGMNPFATPNNILHVHRYSPNDITAQCCRFEAFERQMKSTKEARGDANVKYGWLGSRKSDIVRILINGLGTTANPVEKAGLSAGVYLSPENRAFTSVGLCDVDEKGVQYMLLCRMILGNVEAVEPGSQESFPSSEIYDSGVDDCSNPKCYVMWPSHLSTHIRLEYLVSFKLAPKVRR…
	ZmSRO4	GRMZM2G072894	GRMZM2G072894_T01	MEQRNVLALGEHVLKATVWKRKHKTAMEHPEGNDVMVFSQHDQRKHPVIFDDRAKCKKSKLISCGSGVILESYWNFKTSGLPVRVLFYQHGDWSDFPEDVVNLAQQDFQLKKPITAVFQNKHILLDFIHMICIDYEMTIDKPLAWVDDNGKRFFPDLSAGLYTSKPSQHENGEADECDGTPTSVAESSSSVSVGEVVSHGKRINDIAEDNMRAHNILYEAVGENISGPSFHLNEYSSGTIQATGKPNDCRRIDSAVRNLLLKGLGQPFSEEDIIGIYRTPLLDQRGQVRCGLFQKEIEETRSRRGNANVRYAWLPCSRYTMEQMAMRGALEIAKPHKGSICGVGTCLAPACTNSCARYSDFHEDGIIRMMLCRVIMGNVEVVLPGSKQFQPSNGSFDNG…
	ZmSRO5	GRMZM2G145236	GRMZM2G145236_T01	MDCSSGDVKAETTRPAAVAAAAAAAAGGGTPSLLRGWREFRRSAVPARFLCFEDGKWVDVAGEAAAQLRRAFQERRVADASCGGKAYLFDFLRMVRIDEATGEETGLAWIDHRGGCFFPAPAACGGGRKRGRDDDGAPAEDKAEAESS​​SAASGVDDRSGGESRGADAKRRKALGNAAASLGEKDRSYQVVSKLFLEYGMAQRGAAVTAVRKVACGARAAAFRDQGRLLADARGAAAGSAKFAWYGASADDVAAVVDRGFASNNAPRLGAHKHGDGVHLSPPHCPYRSATLAKADGSGEAHIVLCRVLMGRPEAVPAGSSQSCPSSHNYDSAVDKLDNTQWYVVWNQDMNTRILPEYVVSFKCSKLQLTQG
	ZmSRO6	GRMZM2G177878	GRMZM2G177878_T01	MDCSSGDVKAETTRPAAVAAAAAAAAGGGTPSLLRGWREFRRSAVPARFLCFEDGKWVDVAGEAAAQLRRAFQERRVADASCGGKAYLFDFLRMVRIDEATGEETGLAWIDHRGGCFFPAPAACGGGRKRGRDDDGAPAEDKAEAESSAASGVDDRSGGESRGADAKRRKALGNAAASLGEKDRSYQVVSKLFLEYGMAQRGAAVTAVRKVACGARAAAFRDQGRLLADARGAAAGSAKFAWYGASADDVAAVVDRGFASNNAPRLGAHKHGDGVHLSPPHCPYRSATLAKADGSGEAHIVLCRVLMGRPEAVPAGSSQSCPSSHNYDSAVDKLDNTQWYVVWNQDMNTRILPEYVVSFKCSKLQLTQG
Oryzasativa	OsSRO1a	LOC_Os10g42710	LOC_Os10g42710.1.1	MAAMNEKVLDKCGRNISSLKRKRDNPAARCADAGNTSKLHKHPADNSVVRFYVDEGHKAKIKCHFKMQIIQSYQNFMTSALPKRILLRQGGEWKDFPKQIVKLAHSDFRTKKTITEGEHQTHLFLLDFVHMTFIDSKTGLQRPIAWIDENGKQYFPEFFIEDKTLYRKKELGNGNNVYIIVEPNGTQEMNDHFGTSESSAESSNFESSTDDVSSPKRAKAERSVAGNKTGGVKETIGENEPHALLPIPCRSLPQDKLGDHSRVQLAIISAVQKLLLQGLGTVLGSKDIVGIYRTPAVDNHKEFRYNLFKKQAAEHTKCKRGNANVRYAWLACSKDAVDEMMLNGVMHFEKTVKCPDYGIGTILAPANCSNTCVNYSDVDENGIVHMMLCRVVMGNVEIV…
	OsSRO1b	LOC_Os03g63770	LOC_Os03g63770.1.1	MEPKNAIALDEHVLDSTIRKRKRVGATQCAEANDAPNLSQNGPKQNLALFPDSTGHKKSKMMCSADDILERYNNFKISGMPVRVMSHQHGGWRDFPEDVVNSVQQSFQLKRPITSAVFQNRHILLDFMQMVCLDSVMAISKPIAWIDDHGKCFSPDSCAGVIPSEPLQHGKNEFLKSFHDLSSSYEAHEHDGMSAAESSSSASFDAVSSDVQEVNNVVEDKQKVLNESGEVSGENKKGHLSHMNETADGAMQAPRNNQSVQRADSAVRNLLFQGSGHLFTEKDIIGIYRTPMLDQLGRSRYSLFQKEVQVTKNQRGNANERYAWLACTKGTMEEMMMNGALEIAKPLQGPMYGVGAHLAPANSSNICVGLSDIDENGIIRMMLCRVIMGNVEVVFPGSN…
	OsSRO1c	LOC_Os03g12820	LOC_Os03g12820.1.1	MDFSGDVKPAIHRPSVAAARGGGNGGAIPLLRGWQAFRRSGAPARLLCFEGGAWADVAGEVVGLLRRAFMEGKAVCEAACGGRVFLFDFMRMVRIDEATAEEAALGWIDDRGACFFPAPEGGRKRKRERDEAGSEVKGEDRRRRQPAAEEEDGDEASSGVEERSGESRPEADEPDRKKARGTLWGKAVRLDEADKFYKVVEKLFVSRMAPVAAARGVAITAVHKVAQGPRRAFHLQGQLLAAARGVGDGSNAKFAWYGAPAADVAAAVEHGFGRTNGQFLGGRAHGDGVHLSPPQYPHASAMLTKPDENGEAHIVLCRVLMGRPEAVPASSPQFHPSSDEYDSAVDNLENPRWYVVWSTDMNTRILPEYVVSFRWPNLPQMEGSSGLGSKLKKPSPAAT…
	OsSRO1d	LOC_Os06g13860	LOC_Os06g13860.1.1	MDSLQKSHDLCLKRKLVDDCLSKDFKYRRVEEDNVSSNVESRPLPGSPSQSCCIQPNLAKDCVNYLKSGLPSRIAFYKQGAWCDFPQKIMESLVEGFKADKSSAVVVMDDQPLLVDFLSMTMVNLKTRKQRSVSWLDGTGKWFFPSAFFDEGVDESRKLMNMGSEGSGQGLTEGMVPKAPNELVKQAVVETSSPVLQNSCIPDILRKKIVPVERGSESFQFVQNLFLSGMGSFASPKNLLHIHRYSAEDVTAQCRLESFARQMRLTRKKIGYADVRYGWLGSRKQDIVGVLINGFISTGQTSHSSDMRTGVYLSPENRAFTSVGLCDVDEKGVQYMLLCRAILGNMGTIKPGSQDEFLSIYDSGVDNCSNPSYYVIWPSKLGTHISLEYLISFRLTPEI…
	OsSRO1e	LOC_Os04g57640	LOC_Os04g57640.2.1	MASPQESNSLCLKRKLVDDCLSKECKSSRRIKTEKGPSSDSSAKRCKCCCTRPNLASDCVNYLKSGVPSRVMFYKQGSWHNFPEQIMKSLIEEFRSNKSSVVAVMDDEPVLVDFLSMTLVNLKSRKQRSVAWFDDTGKCFYPSLFFDEEADEVAKVGGDFEGATQGIMLDKVANSPPEVVKQVVLESSPPVPQKPATADILRKKIASVERGSEGFLFAQDLFLSGMGPFATPNNILHIHRYSPNDITAQCRLQAFEKQMMSTKEERGANVRYGWLGSRKNDIRILINGFGNNGKPAEKAGLSAGVYLSPEDRAFSSVGLCDVDEKGVQYMLLCRLILGNMEAVMPGSQDSFPSSDIYDSGVDDCSNPKCYVMWPSHLSTHIRLEYLVSFRLSSKVRNYL…
Medicagotruncatula	MtSRO1	Medtr1g112330	MTR_1g112330	MEANNGKASNRNVLNLKRKRASRHATCSNGALRPVLPQCTSLVTPRNKVVKHMRLKGYKSKPMKSENHIGRSLVRYYMNYKKSGSPERLMFYQNGGWKDFPQDVVDLVRKDFDVKKAAVEVELNGHHLVLDFLHMYQMNLKSGLQQPIAWIDETGCCFFPEIYAASDEVPYDLCNQDSRKGQESLFQGPNEIKLHLGIEINGVGASKLGECIGESNVTFKHVQIDAKQACNHNNLEIEDSSNNMGNGSVGEAVEQNKSIGFNAYNEIVYGKLDLDTVQKMFLKGTGSFGSAYIVEIYPFSSTLVQSRLELFEKQAEIAKNCRGDANVRYAWLASSKGELPTMMKCGLGHCVPSAPKCMHGIGVHLAAATCPFASASYCDVDENGVRHIVFCRVIMGNME…
	MtSRO2	Medtr5g032190	MTR_5g032190	MEANSGKASDRVVLNLKRKHASRHATCPNGALRPVLPQWASLVSPRNKVVKQMKLNSYKSKPTKSETHIRRSWVRYYMNYKKSGRPERLMVYQNGEWKDFPRNVVDLVREDFNAKKGSVEVELHGHHLVLNFLHMYQMNLKSGLQRPIAWIDETGCCYFPEIYDDSDEGPYDPCNQDSGESQESLFQDPNDIKLHLEIEINGVDASKLGESTGESNVIVKHTQIDAKQNDLEIEDSSNNMGNGNVGEAVEQNKNIVGSAVVYVRLDLDTVQKMFLKGTSSFGSADIVEIYPFSSTMMLSRLELFEKQAEITKNCRGDANIQYAWLASSKGELSTMMKCGLGHCGISTSKCTHGFGVHLAAATFPFASASHCDIDENGVRHLVFCRVIMGNMELLRPGTR…
	MtSRO3	Medtr7g011550	MTR_7g011550	MEENPSKALDGVSLNKKRKRDSQGVSRRTGVLAPTSVVVKQMTLARDICKPDDSCPDISKSLVSYYLNYKKSGIPKRLMFYKNGKWVDYPEDVVDLVKKDFKIKKAIVEVELNGQEVVLDFLHMNHVDMKTCLQQPIGWIDEEGNYFFPKVFVGSTEEPNNIREREGEERLNKKEPHEIKLHISNEINGADESKLRKYSRESDNATKNVKAEGHAMTTKIGIQNVAIDINQEPDIDLNDYSESLYGKLDVNSTQKMFLKGMSSLGISESDIVGIYRSSGRSMQMRLQLFEKQADIIKGIRGVANIRYAWLACSKEEISTMMEYELSHYELSPSKCIYGPGVHLAAITHPFVCSLSCDEDGNGIKHMFLCRVIMGNMELLRPSSKQLRPSDCEYDNGVDD…
	MtSRO4	Medtr5g029580	MTR_5g029580	MDTKLAKTLDGAALNKKREHATRCVADDSNDKVGSENTVVDIKQEPDVNLDAYTEYAFENLDVDSVQRMFLTGMTFLGFIESDIVEVYRNSGKSMQIRLDLFKMQVDITKEVKGDANVRYAWFASSKEELSTMMEHGFSHYELSPPKCLYGFGVHLATLPHPYVCSLFCDVDENGTKYLVLCRVIMENMELLRPNSDQVRPSGYEYDNGVDNIQCPKYYVVWNININTHIYPEFVVRFKSSLEAEGDVTNIFIYYLYIQPIYVCGMPQGKDFSTPSNNRRIPKSPWTSFRTLLDAIRNMVPSNIMDQITGYYEKLVTKKISRDEFVRKMRFIVGDNIMKAAITYSHFKRASGGGGSNGSNIKQE
	MtSRO5	Medtr8g088250	MTR_8g088250	MHPIEKMTCNGLMNKVEEESGEYQFIKKGFLKGMGFMVDVTNIMAIHKNNVSTNLTKQASLDSFHIFSKAVSIKCGGNANVRCAWYGGSLDELVDIVSFGFTGCNIHVDDDDESHGVGISLSSANFSIDSAMSTVADENGLRHVLLCKVILGRVENVPVDSKQSQPSCRQYDTGVDDISSPRKHIIWTAFMNSHIHPEYIVSFNYNYVKDQGVFGTLKPQSEYVLLPNLVAKVSNHLKPSQMSLLLKSCRIYQEQKITRETWVNQVRKIVGDMLLHSVITDKSSGDVHPL
	MtSRO6	Medtr3g077870	MTR_3g077870	MEFAQQQEQWDHGASIGEDSSTVSDCESGVSATTTGEEQRQRRQNSDSFLVWLGEGDSVYDLLKTRFLHGLGALSSKAEILAIQRNACSDAVSQARLRSFLVYAEAVSKLRGGDSNVKYAWYGSSGENDVRGILSNGFSHVHGNSICLSPDDSPLQSVKSCAVGRDGVRHLILCRVILGRTEIVQADTKQCYPSCADYDSGVDSFSAPTKYMIWSSRMNTHVWPAYVLSFKVSSLKAVEIEGYGRPTSPSVPFPTLISMLSKVSPQLDIALICKFYKARKEKKISRHELIEKVRQIAGDKLLFSIIKYYRAKKKPTSFQQARSKNGN
	MtSRO7	Medtr4g105740	MTR_4g105740	MEQPIYNLPKHDSAGEDESAISDCESVASGGHDSSRPVRKTTEGADINLIRSRFVCGLSAQGLKPYGVAIFRNPCKTVMAQARIQSFEIFARAVAKMRGGNANVKHVWYGASSREEIVDIIQHGFGYVHSNGLRLSPNDTPLESVKRTVVDKQGFRHLLLCRVIMGKLEAVPAGSDQRRPSSEEFDSGVDSFSSPKEFIVWSNKINTHVLPEYVLSFKLASDKGHEKVGVGGQHMRPSSPFMQFPTLISALSKILPPSDIVSIAKFHKEYRDKKISRHEMIQKVRKVAGDKLLFSVIKSFRAKKMHAIFKQAGPPATWMECSSIQ
clycineMax	GmSRO1	GLYMA_08G123000	XP_006585197.1	MQQPIENSVGKGLMKVEEESEEYESIKNVFLKGMGFVGHATDAMAIYKNMLSFSVARQARWVSFKIFSKAVAIKSGGDANIGYAWYGSSLDDLLEIVSGGFHGCKKHDDNDDDECHGIGIPLFAANFSLDSAMCTVADEHGFRHVLLCKVILGKVEAVHAGSKQSQPSSKQYDTGVDDISAPRRHTIWTAYLNTHIHPNYIICFKYNNYIKDPEMHGALKPQSPYVSFPNLLARVSNHLKPAQMSMLLKDYRIYKEQKISREQWVNKVRLIVGDELLRLVITTQ
	GmSRO2	GLYMA_04G183100	XP_003523079.1	MELTFPHQDEDDSVVSDCESGVSGSGVVVAPPPPPPQQQQRGFFVRLGEGDVVHDLIKTRFIRGLGMLGPKTEVVSVRRNACSDVVSQARLHSFHAHARAVARLRGGGNHANVKYAWYRTNGEDDVNDIVSQGFGFAHGPKLVLSPDDAPLQSARGCGVGKDGVRHALLCRVILGRSEIVRDNTEHCYPSCEEYDSGVDSFSGPTKYIIWSNRMNTHVLPAYVVSFRVSSFKGMEKSEEEPLRPTSPWMPFPTLISALSKVLPPCDIALISKFYKDKKDKKILRHELIQRVREIAGDKLLVAAIKSYRDNKKPSFLQSRSKNGLATRIK
	GmSRO3	GLYMA_05G037700	XP_003525502.1	MDPLGKRPAAEDDSLISDCESGVSAGDTPPPFVENADLVRTRFVRGLVAHCFKPEVLAVRRNVCSSVMALARQHSFHVFARAVAELRGGNANVKFAWYGASSKEEINDIIQHGFGHAHSNGLRLSPQDSPLESVKSSVVDEDGLRHLLLCRVILGKTEVVPRGSYQCRSSSQEFDSGVDDLSNPKEYVIWCNQINTHVLPEYVLSFRLPSPLKGIVKIGEPLRPSSPWMAFPALISMLSKILPPSEVASIAKFHKDYREKRISRHELIQKVRVIAGDKLLLSVIKSFRAKKIPANFKDDKAKEWQADSQQLERNDCSYGSSISYYRK
	GmSRO4	GLYMA_17G089400	XP_006600642.1	MDPPIHHPLGKRPAAEDDSVISDCESGVSGGDTAAGFVPADENADLVRTRFVRGLAAHGLKPEVLAVGRNACSSVMAQARQHSFHVFARAVAKLRDGNANVKFAWYGASSKEEISDIVQNGFFGHAHGNGLRLFPQDSPLESVKSSVVDKDGLRHLLLCRVILGKTELVPRDSNQCRSSSEEFDSGVDDLSNPKEYVIWCNQINTHVLPEYVLSFRFPSPLKGHVKIGEPLRPSSPWMAFPALISVLSKILPPPDIAYIAKFHKDYREKRISRHELIQKVRVIAGDKLLFSVIKSFRAKKIPASFKANKGNEWQAESQQLERYDCSYGSSINYYRK
	GmSRO5	GLYMA_09G207200	XP_014617793.1	MEAKIAKALDRVALNLKRKRATRYAAHLSGASQPMLGHWSSFTSPTSRAVKRMRLGGYRNRLTNAGPHIGRSLARRFLNYKKSGRLERLMFYENGSWLDFPKDVVDLVKKDLEIKRAAVEIESHGYHLLFDFLRLHKMDLKTGLQQPIALIDEAGCCFFPEIYAASDEEPYNLSKQEGGKSPDSYASNEIKLHLEVEINGVDQSRLSECSGESNALVKGIQIDTKENCCQYDVEVEDSINKKDCGNVGEDIQQHQDIGLDAYTESVYGKLDLNSVQKMFLKGMCSFGSTDSDIVEIYHCSGASMQARWELFQKQAEITKKNHGEANIRYAWLASSKGELSTMMNYGLSHYGLSGSKCTYGIGVHLAAVTCPDASVRYCDVDENGVRHLALCRVIMGNME…
Elaeisguineensis	EgSRO1	LOC105032759	XP010905614.1	MALPIEPCGSALKRKQAESSGLRDGKTPRVSVEHGPSSRSSVCNCHCCRVQPNLAETCFNYLNSGLPRRIMFYNCGDWSDFPEPVKQSLIEGFKDDKSSVMVMVNGQHLLVDFVSMVLVNLRTRKQCSVAWIDDSDKCFFPSLFFDDVAEEFSELGSGIMNSSFQRPVLVRALCPPAEVVKRVVMENATSVSQPLTAESLRSKIENVERDSESFLFVQNLFLLGMGPFATPQNILQIHRYAPKDLPSQIRCEAFERQIRSTRAQRGDANVRYGWFGSKKIDIAGILIHGFGMVGKPTEGVLGTGVYLTPDNRAFASVNLCDVDEKGVQCMLLCRAILGNMEQVRPGSRQCFPSSGNSDSGVDDCLSPTCHVVWSSHLGNYIHPEYVVSFKLSSHIREYL…
	EgSRO2	LOC105053816	XP010933419.1	MEVRSEKVLGKSGRILGNKKRKRDSAAHLTDCGDVLVSHQPVADQYPVRCHDARECKLGFSCYSETHIVKNYRNFLRSGLPQRVLSYQDGEWKDFPENIISLVREDFQLKKSIIEAMFQNQQLLLDFVHMVCVDLKTGLQKPIAWIDEHDKCFFPELHPEFYASNGCHHSSKGKHVHMSCEPNGTRDLNAHIEIAVSAAESSNSGPDDEVMSNVKRVKTETIFASNQNMYAEVNETVGENEPCSFVPPKVSGLGTSHGKLIKPVGAPCVNNAVQDMLLQGLGPFIDAKDILGIFRTPLKDNLGQIRFNLFQKQVDITKNIRGNANVRYAWLSTSRDAVEDIMLQGIMRIKKPVHGPVYGIGTHLAPANCSNICASYSDVDENDVVHMMLCRVIMGNVEV…
	EgSRO3	LOC105043955	XP010919988.1	MEARNEKVLDKGGSILGNLKRKRNSAAYLTNSGHALVSYLPVTDQSCGRCCNVSERKSVFSHRSAAHVLKNYNNFMRSGLPQRVLSYQDGEWQDFPENIISSIREAFRLKKAITEAVFQDQQLLFDFVHMVCVDLKTGLQKPLAWIDEHGKCFFPELHPEFYASNGCHHSGKGKHVHMSCEQNGGHGPNACIEISVSAAESSNSGPDDEVMSNIKRLKSERNFASNQNMYPEVNETVAENELCSFVPQKVSGLETNQGKLVKPVGAPRVNNAVQHMLLQGLGPFIDAQDIVGIFRAPLKDNSGQIRFNLFQKQVEITKNFRGNANVRYAWLASSRDCVEDMMLQGVAKIKKPVHGPVYGIGTHLAPANCSNICASYSDVDENGVVHMILCRVIMGNVEV…
Solanumlycopersicum	SolySRO1	Solyc03g114360	Solyc03g114360.3.1	MENFVKPQFFSFLREEAAAVVQRYSPHHKFMAQSGFGNQFAESTSSSADDVQDPEVSDSESSVVGSVHEERSSGLMRIDEGDKIYGIISNKFLSGLGCFGLSTEITAIQKETCSSFVKQAKLQSFLIFSKAVEKKCSGNANVKYAWFGGSKDEISNIFSHGFSCRSNNGAYSQAICLSPDDNSHDCLQAAVPDKNGVRHLLLCRVILGKTEVVHPGSGQCHPSSEEYDTGVDNLSSPRKFIVWSTHMNSYVFPEFMVSFRVSSHAKGEHLSSALRELECFRGCAGLLILVLIYAESQRNAVPIQNPKSPWITFPALISALSKFLPPQTVKLITKYHNDHKGRKITRRDLIQQVRKLAGDELLTAIIKSCKNKQSKGSTGNSSSTSSINFEQRDGGCCAC…
	SolySRO2	Solyc05g005280	Solyc05g005280.3.1	MDQLGNDDQVSMTIENHEMLFSSDSEVESPSPRTNYHFRSLKSNEVMKLEEGDQDHDLIKAGFLSGMGQLGNEIEVVAVHKNSCSTILGQARSESFRIYSEAMRKKCSGDANIKYAWFGSSKDEICNIISHGFSTIMEPNYGDCFGNGVHLYPANIDGVFSAVEDENGLRHMLLCRVILGNTEVIEASSKQFQPTCQDFDSGVDNYLAPKTYIIWPSNMNSHILPNFLVSFKGPLSLGTSLKIKIPLKPTPRIKFSNLLRVLSNFLHPSRMVLITKKYEDFQKNKISKMIFVQKLRQIAGDTSLLKSCHDIVSKH
	SolySRO3	Solyc05g005290	Solyc05g005290.3.1	MNQFGDHNDQVSMTIDDEKMLLSFDSQVESPSSTYHDSLRSFKKNGMIELEERNKEHDLIKAGFLSGMGQLGKEVEVVAIHKNSCSTILGQARLESFRIYSEAMRKKCGGNANIKYAWFGSSKDEICNIISHGFSTITEPKSGECFGMGVHLYPANIHGVLSALEDENGLRHMLLCRVILGNTEIIEASSKQFQPTCQDFDSGVDNYLAPKTYIIWPSYMNSHILPNFLVLLRKSRRFLQNRILV
	SolySRO4	Solyc06g066330	Solyc06g066330.3.1	MEPKGVGFLDSGRRTVVGEKSKVVTQNLAHLLRASSEKISIQSNCDRKLEKRKRIVHCESNSQSHLRISEHKNYLNFKRSRLPLRVLFYQNGEWTDFPQDIIPIVKEDFRAKKTVIEVKVCDFHIILDILHMVQIDVINGLQKPIAWIDEVGRCFFPESYLISSEMLGNFETLSKRTEEFMTTEPDRITDMKLQLDTDLNGLDNRNLEEDVEESNIGYKRNKVCPLKDSQEVADYKKSDAKIAQVAENKQNQETPSPDLEASLKFVNAESVKNMFIMGMNVNPNKCEIKINKCSSNYLTTRLELFEKQVEITQKYRGNSNVRYAWLAASKDLISTIMKYGLAPGGSKYRPKFGVGVHLSALHCASKSAINCDADENGVHYMVFARVILGNMEPLHCGSE…
	SolySRO5	Solyc08g005270	Solyc08g005270.3.1	METKFEKVLDRSRNIVVDLKRKREARCETHLSGATHVILPVRPLLNSSIRPLGKRTKLNGSRSRCGGYKFHQKESLLRYYLNFRRSGLPQRLMYYQNSQWTDFPENIVSMAKQDLRTKRSAREVVFNGNNYVLDFFHMMLLDLKSGMQQPIAWIDEAGKCFFPEVFAYCDELHEPCHCEDNDCVDVDSETEGSNDLELRLEIEVNGADISSSEESSGESNANFEQVNFCHEPAAKNRIAEVGDDHVRISDTKAKDDSVENYQMVENAVGRYDSKWKHMDPKAVSEMFLKGISSSASANIIDLQRISSSFMEVRKELFQKQVEILRKHRGDATVSYAWLPSSKGMITSIMKYGLANYYPSRTNSSYGIGVHLFPANCSEISAKCSDVDENGVQYMVLCRV…
	SolySRO6	Solyc08g076420	Solyc08g076420.3.1	MESNWVEVLDNDRRTADVDSKSKVASQYVARIVGAGTEKLEELSFQPNCSSFYSTLGKRKRTVEGETNCRSHLRKSTVKNYSNFIKSGLPQRVLYHQNGEWNDFPQDIVRIVKEDFRAKKAVIEVNFGGFHVILDILYMVQVNLVTGLEKPIAWIDEAGGCFFPDLCLVSCKAHDNIEIQSQRTEGFSAAEPDRATNIKLHLEIDINGPNNCKLDEGMEESNVRVKRIKVDPLKDNQQFAVDQKSYPKMEVVAENQQDQESLSPILEDTLKLVDAESVKTMFVKGMNTIYMVDIVKISQCSSKYMRNRLELFEKQAEITQKYRGKSNVRHAWLAASKEVVSTIMNYGLMHGACGQKTKLGVGVHLIAQDCASKSAASCDIDENGIRYMVLCRVILGNEE…
Setariaitalica	SiSRO1	SETIT_038679mg	KQK89743	MAAVNEKALGKCGRNPNSLKRKRDSPVAYDADACRTSGLRQRPANDSAVRFHVDQDRKAKIVCHFNKQVLQSYKNFMTSAPPKRILLRQGADWKVFPEKIVKLAQADFRAKKTITETGYQNQLFLLDFVHMTFIDSKTGLQRPIAWIDENGKGYFPETFLQDEKLFMKKDFGNGNHEYISVDPNGTQEMNGQLGASESSAESSNFDSSTEDISSLKRARAEKSSIGKKYGDMREAIGENEPCTLLPTACNLLPHQTNLGEVSRAQQTVEAVEKLLLQGMGSVIGSKDIIGIYRTPLLDDCAQVRYHFHQKQVQVTECHRGNANVRYAWLACSKSTVHEMMLNGVLQVHKPIKCPAYGEGTILAPANRSDTCVKYSDVDENGIVHMMLCRVIMGNVEIVH…
	SiSRO2	SETIT_016267mg	KQL28172	MASPQESNSVCLKRKLVDDCLSKDCKSRRVKSENGPSFDPSAKRCNCCCTRPNLANDCVNFLKSGAPSRIMYYKQGSWHNFPEQIMKSLIEEFRGNKSSVVSVMDDEPILVDFLSMTLVNLKTRKQRSVAWFDDTGKRFFPSLFFDEESDEMTKGDSGNVDSTAQGIMVDKAATSPPEVVKQVVLESNPPVPDKPSTVDVLRKKITSVERGSESFLFVQDLFLSGMDPFATPSNILHIHRYSPNDITAQCRFEAFERQMKSTKEARGDANVRYGWLGSRKNDIVRILINGLGTTANPVEKAGLSAGVYLSPENRAFTSVGLCDVDEKGVQYMLLCRMILGNMEAVEPGSQESFPSSEIYDSGVDDCSNPKCYVMWPSHLSTHIRLEYLVSFKLVPKVRH…
	SiSRO3	SETIT_035001mg	KQK91835	MSSTVPSDSNEFLFWFAQVFMKGVVSTGYVTSNTPRPASVTDVLTDVASTCRARVRPGRRRRRHAPPLPILQPISRAFNPSGGPPDPSPDIPRRRERSRALHKSHNRSIGLGMDFSSGDVKAAIMRPAGVVVGGDAAAGTPALVRGWFEFQRSAAPARFLCFHDGGWVDVDGEAVGQLRRAFQDRRAMVEAACGGKAYLFDFLRMVRIDAATGEEAALGWIDDRGACFFPAPDCGGGRKRRRDGAPAEDEAESSSGVDERSGESRGAEAAAKRRKAGGAWGSAAARLEENDKYYQVVSKLFLSYGMANLGAAITAVRKVAQGARARAFQRQGQLLAAARGDAAGTPKFAWYGASAEDVATVVGRGFARTNAPRLGARKHGDGLHLSPPQCPYSSAMLTK…
	SiSRO4	SETIT_034895mg	KQK86112	MEQRNVLALGKHVLKATDRKRKRETAQEHAEGNDAMVLSQHDPRKHLVRSDDRAQFKKSKVASCGIGGILESYWNFKRSGLPVRVLFYQHGDWSDFPEDVVNLAQREFQLKRPITTAVFQNKHILLDFIHMICVDYEMTINKPLAWVDDHGKDFFPDLSSGLYMSKPSQHEKGEAVERAGMSTSVAESSSSVSIGEVVSHGKRINNIAEDNLEAHNKLDEAIGENKSGPSVHLNEHSSGIIQTATGKRSNGPRVDSAVRNLLLQGLGHPFKEKDIIGIYRTPLLDQHGQVRSGLFQEEVEVAKSRRGNANVRYAWLPCSRGTMEEMMMRGALEIAKPQHGHTHGVGTCLAPANCSNSCARYSDFHEDGVIRMMLCRVIMGNVEVVLPGSKQFQPSNENF…
Phoenixdactylifera	PdSRO1	LOC103719254	XP_008806623.1	MASPSEPCGSALKRKLAESSGLRDSKIPRVGVEHGPSSRSSVCSCHCCRMQPNLTETCFNYLNSGLPRRVMFYNRGDWSDFPEPVKQSLIEGFRDDKSCVMVMVNGQSLLVDFVSMVLVNLRTRKQCSVAWIDDSDKCFFPSLFFDDMGEEFPELGSGIRNSSFHRPMLARALCPPAEVVKRVVMENAASVSQQPLTAETLRLKIENVERDSESFLFVQNLFLSGMGPFAIPQNILQIHRYAPKDLPTQIRCEAFERQIRSTRVQRGDANVRYGWFGSKKIEIAEILIRGFGMGGKPTEGVLGTGVYLTPDNRAFASVNLCDVDEKGVQCMLLCRAILGNMERVQPGSRQCFPSSRDNDSGVDDCLSPTCHVLWSTHLGSYIHPEYVVSFKLSPNIREY…
	PdSRO2	LOC103714560	XP_008800068.1	MEARNEKVLDKGGRILGDLKRKRDSAAYLTDSGHALVSHPPITDQSCGRCCNVRECKSVFSCRSATQVCQKYHNFMRSGLPQRVLSHQDGEWKDFPENIISSVCEDFRLKRAITETAFQDQQILLDFVHMVCVDLKTGLQKPVAWIDEHGKCFFPELHSEFYASNGCHHSSKGKHVHMSCEPNGRHEPHARSEISVSAAESSNSGPDDEVMSNVKRVKSERNFASNQNMYAEVNETVAENELYSFVPRNVSGLETSQGKLVKPVGAPRVKNAVQHMLLQGLGPFIDAQDIVGIFRAPFKDNSGQIPYNLFLKQVEITKNFRGNANLRYAWLASSRDAVEDMMLQGVMRIKKPVHGPVYGIGTHLAPVNCSNICASYSDVDENGVVHMMLCRVIMGNVEV…
	PdSRO3	LOC103717107	XP_008803591.2	MEGTNEKVLGKSGRILGNIKRKRDSAAYLTDAGHVLAHQPIADQSAVRCYDAIECKLGSSCNSEMCIVKNYRNFMRSGLPQRMLSYQDGEWKDFPENIISLVCEDFRLKKAITEAMFQNQQLLLDFVHMVCVDLKTGLQKPIAWIDEHGKCFFPEWHPEFYALNGCYHSSKGKHVHMSCEPNGTRETNAHIEISVSAAESSNSGPDDEVVSNVKRVKSENIFASNQNMYAEVNETVGENEPCSFVPPKVSGLGTLQGKLKKPVDAPRVNNAVQDMLLQGLGPFIDAKDILGIFRTPLKDNLGQIRFNLFQKQVEITKNFRGNANVRYAWLSSSRDAVEDMILRGIMRIKKPVHGPVYGIGTHLAPANCSNICASYSDVDENDVVHMMLCRVIMGNVEVI…
Chlamydomonasreinhardtii	CrSRO1	CHLRE_06g297650v5	PNW82868	MRSLQRCPLATGPKPQISHIEPVNDDNMLLWRLRVLPAFDEDVAAGRQLNADLRRLGQMRGSGGQDYILMEVSFPQDYPTNPFFLRVVSPRCVMYTGHVTAGGSICIEALVATGGPGGWQPDYCVEAVLVLVLANMLTAEVAQVRTATGPGGISGPLRVDLSAGLAPYSDFEARAAYDRTVANHGWRPAAAGAGGGGNAAAAPTAGQGVPPGVVSLLDDDDDDQVASKRRKERAAIKELVANGLSADDARELLLEQCGGDLDAALGVAMQSASFLSRSRVVRVERVQNWRMWTKYCIRRSEILETLREEVWGGGAAGRRPKQDATSANFGSLNEFYMWHGTSNVVIEAVVRDGFDMREASRAGSLGEGIYFAANASYSLAYTLSKQALKPAPGAYGGFA…
	CrSRO2	CHLRE_17g738550v5	PNW70909	MGGVAAAGGGGPMVWQVPAFAGHNSPTFVLRAHDSHTQEPFAHGAVAYHGTHLENLHSILHAGLQSGSGTRLQRTGANFGAGIYLSTNYDTAFSGRTPHSHDAANGTGGGASSSGPLIPGLPDTYLLPGLCKIDEEGFVFSRRKVKLGSLTELAEKARKAIVVRQKKEEKRMRANSALNGPAGLDVGSHSGLIWDPCAGLAGLRRVESSAALPWRTNPEDKRASQTQLQGSHASWPANSHASPDSASGPASASGAALPPLSAWQPFAVSCGAPHLAATAAPTARHNQSLQDTATVDFRILWSAAAVTQPPAAAGACPYKLSNYMSEPHYPYSAYYDMPYYDMAPGLAAASAPSPFLASAMGAEADAGPASAAATGGGGGGSKGALAPTAGGSSVVK
Brachypodiumdistachyon	BdSRO1	BRADI_1g01170v3	XP_014752821.1	MERKNLMALDEHVPKAIDRKRKHESAVMSTGRDDAVEVSQHVPRKNLVMLDDEAAYKRSKMNSCAGHILEWYKNFKTSGLPVRVLCYQQGNWRDFPEHIVNLVRQDFQLKKPITNAVFQNQQVLLDFMHMICLDSAMTAGKPIAWIDDTGKHFFPDLCAGRMTSKPSWHGKSDPTGKSQAVGCAGRLTAAAESSRSDSVDEVLSHVKKVHNEASAENKSGPSICLNESASGTMNNGNCKQERGPHIASAVRRVLVEGLGHPFTEKDIVGIYRTPLVDQQRQARFNLFQKEVEVTKKQRGNANVRYAWLPCSRDAMDEMMMHGTLQITKPLLGPTYGIGTHLAPANSANTWMLMCRVIMGNVEVVYPGSKQFQPTNETFDSGVDDLQKAKHYIIWDANVH…
	BdSRO2	BRADI_3g34250v3	KQJ97945	MAAMNEKVLAKCGKNTSSLKRKRDSPAAYYAGAGRTSELHQHPVGNSSIRLFVDEDHKANIACHLNRQILRSYQNFMTSAVPKSILLRQGGNWIEFPEKIVKLAQVDFRAKKTITEVGYQNQLFLLDFVHMTFIDSKSGLQRPIAWIDDNGKRYFPDVFTEDQILYRREDLSNGNHVYVRGVPNGAQVISDQFGASESSAESSNFESSTEDVSSAKRVRAEKSIIRKEIGDAGETVGENEPHTSLPTAYTFQPQHDKPGGQSRAQQASSVVQQMLLQGMGTVIGSKDIIGIYRTPTMDSFRENRYNLFQKQVEVTKSQRGNANIRYAWLPCSKDTVDAMMLNGHLQVKKPSRCPAYGAGTLLAPANCSINCVNYSDVDENGIVHMMLCRVVMGNVEIVH…
	BdSRO3	BRADI_1g63360v3	PNT77471.1	MALSQESKSLCLKRKLVDDCLSKECKSRRVKVDNGPSADPSAKRCKCCCTRPNLASDCVNYLKSGVPSRIVFYKQGSWYNFPELIMNSLIEEFKGGKSSVVTVMDDEPVLVDFLSMTLVNLKTRKQRSVAWFDDTGKGFFPSLFFDEQADEMANVTSGNVEGNAQGIMLDKVVNSPPEVVKQVVLESSPPVPQNPSTADVLRKKITSVERGTEDFLFVQDLFLSGLGPFATPNNILHIHRYAPNDITAQCRLQAFERQMSCTKEDRGDSNVRYGWLGSTKTDIVRILIHGFGTTGKPTEKACLSAGVYLSPEDRAFTSVGLCDVDEKGVQYMLLCRVILGNMEAITPGSQDSFPSSEIYDSGVDDCSNPKCYVMWPSHLSTHIRLEYLVSFRLPSKVRH…
	BdSRO4	BRADI_5g25800v3	XP_024311423.1	MASSQEPKSLCVKRKLVNDCLSKECKSRRVQVENGPSSDPSAKQCKCCCTRPNLASDCDNYLKSGVPSRIMFYKQGSWQKFPEVIMKSLVQEFKGRKSSVVSVMDDEPVLVDFLSMTLVNLKTRKQRSVAWFDDSGKGFFPSMFFDEETDGVYSGNVDGIEEGIMLGKPSNSQPEVVKQVVIESSSSIPQKPSTADVLRKKITSVERGSKDFLFVRDLFLSGMGSFATENSILHIHRYSPKDISALCRLQAFERQMSCTKEDRGDSNVRYGWLGSRKSDIVRILINGFGTTGKPAEKACLSAGVYLSPEDRAFTSVGLCDVDEKGVQYMLLSRVILGNMEAITPGSQDYFPSSEIYDSGVDDCSNPKCYVVWPSHLSSHIRLEYLVSFRLTPKVQNYLL…
	BdSRO5	BRADI_1g69140v3	KQK22746	MDFSGDVKQAIPRPAVAFTGVGSGGPSPLLRGWREFRRSAAPVRFLCFEGAAWADVEGEAAAALRRAFLDGKVVAEAAYGGREFLFDFLRMARIDAASAEAVAMGWIDERGACFFPVPESGRKRKRGHPEQDGASSGVEEGSDESSETVDSGRVRKAARGAWGKAVKLEETDKFYQLVKKLLLSGIAPMGGRGVAMTAVHKVAQGPRSRAFQLQGQLLAAQRGAGGGNAKFAWYGAPSVDVAAAVEHGFGKTNSRVLGHRAHGDGVHLSPPQSPYASAMLAKADESGEAHIVLCRVLMGRPEAIPAGSSQCHPSSDNYDSAVDNIQNPKWYVVWSTDMNTRILPEYVVSFKCPNLQQMQGSSSRATSELKKPSPVARDMFPTLLAEIQRFVPSSKLQTL…
Malus domestica	MdRCD1	MDP0000234325	MDP0000234325	MEAKVAKVLDSGRRVMLDLKRKXATRYATYFPGATHRVSQRPSLNKLAKRRKLYGCKSKLMSRGSQRSLLVSYSNFSRSGVPQRLMFYQSGEWTDFPQDLVDLVRKDLQVKKETVNIKSHGQHYVLDFLHMFRLDLKTGLQQPIAWIDEAGSCFFPEIYAEDDDEPNWYCPPEGGKGLEPWAEDQCESHEIRLHLEIEINGMGQSGLNECSGESNGFVKKIQVDQIPASNRDGIEVENSCNRKPGLNDDAYSDDNEAMTKNLARATEIEKEKLDCDTVRKIFLKGMSNFDSVDVLDIYKCSSTLMQARLELFQKQVEITKTFRGDANIRYAWLASSKGELATIMMYGLGHSGLATNKSIYGTGVHLTEASFSNXCMLIRGGLNFSFVHSASSCDVDENG…
	MdSRO1	MDP0000232873	MDP0000232873	METKIAKVXDSGPSAKLDSKRKRATRYAAYFPGATHGVSQRPSLNKLAKRRXLYGSKSKLMSHGSRRSLLASYSNFSRSGVPQRLMFYQSGEWTDFPQDLVDLVMKDLQVKKETVNIKSHGEHYLLDFLHMFRLDLKTGLQQPIAWIDEAGSCFFPEIYDEDDDEPNWYCSPEGGKDLEPWAEEHCGSREIRLHLEIEINGMGHSGLNECSGESNGFVKKIQVDQIPASHRDGREVENSCNRKHGLIVDEYSEDNEAMTKNLARATEIEGENLDRDTVRKIFLKGMSSFDSVEVLDIYQCSSTLMQARLELFQKQVEITKTFRGDANIRYAWLASSKGELSTIMMYGLGHSGLATNKSIYGTGVHLTXASFSNTCMLIRGGINFSFVHSASSCDVDENG…
	MdSRO2	MDP0000648216	MDP0000648216	MSTDQFEFEDQISMTIDNDEEILDSGSDCGDSNAAVSDRFGVFTRSGMIRVDDESLEHEIIKKSFVSGMGLAGRDTNIVAVHKNLSSDPTRKARFESFKIFSQAVASKCGGNANVKYAWYGGSKQELCDVLVHGFNRCREPVPNEVSYGVGVHMIPAKFTCDGALSSAVDESGLKHILLCRVILGKAEMVAPGSKQSQPSCKEVDTGVDNLVNPRRYVVWSAIMNSHIYPCYVVSFKAPNTLPNVVSGVPTAQQSALRQPPTSPWMSFPALMSILSKFLPPQKMQLLVACHNEFRANKVTRPQLIQRVRQIAGDRLLIGVIKSVKRQIGARANA*
	MdSRO3	MDP0000250866	MDP0000250866	MSTDQFEFEDQISMTIDNDEEILDAGSDGGDSNDSVSGRFGVFTRSGMVRVDDESFEHEIIRKSFVLGMDLAGRDTNIVAVHKNLSSDPTRRARFESFKIFTQAVARKCGGNANVKYGWYGGSKEELCDVLVHGFSRCREPAPNEVSYGVGVHMIPAKFTCDGNLISLKSKCFIFIEELMGCIERLGRALSSVVDESGLKHILLCRVILGKAEMVAPGSKQSQPSSQEVDTGVDNLVNPRRYVVWSAIMNSHVYPCYLISFKAPSTLPNVVSGVPTMQRSALRPPPTSPWMSFPALLSILSKFLPPTKMQLLVVCHNKFRANKITRPQLIQRVRQIAGDRLLIGVIKSVKRQTDAGANA*
	MdSRO4	MDP0000558221	MDP0000558221	MASSAAPTPKKIVQSVTVRVPQGMLSPSSSSASSKNFCNRPSNRMHYPSNFKRSAAPARVMFFQNDSWNDLPTPIVEFLRSGFAERKAVVSVEIEGSTVLFDFVRMLQIDLGAGSQRSIAWIDVNARPFFPRAFVSEDLVDGSDSPKVQINKRINVSGRVLGKRQTEERPMDEDEVTSSIRPRSSEWPNVRLVGEAERVCTVCSNLFLAGMKKVDLAAAVTAVHQCVRXGPLDKARLEVFQKQIEITTAARGSANVIYAWCGVSGNDVKGILTXGFGAPSKVSGPQSHGVGLHLSHLSVPFLSAGQSEXDDNGEKYAILCRVILGNVEKIEAGSKQCYPSGVEFDNGADDPKNPKWYVIWSTNMNRHVLPECVVSYKSNYVPAQSVRRAYPVDMLISKI…
	MdSRO5	MDP0000697620	MDP0000697620	MEYRNDYPNLSSGNSSEDERSDQFSDSGNSSEDDSASETVHSSISDSESVADSGSSSSGNQSRPFGDGLVPLFDGDRVHDLIKQRFLSSLGLLGAQASVVAVHRNSYSSLVGQARLRSFQIYLKAVEEKCGGNPNVKYAWFAPSSKDEISKIICHGFGNFEQPQTNGAFGNGVYLAPDDSPLQLVESLNVDEDGLRHLLLCRVILGRPEVVCPGSKQHHPSSEQFDSGIDSIFAPKKYIVWSTHMNTHILPEYVISFRAPNCLKELLKVQEPVKKPTSPWMPFPALIGVLSKFLPPPSIALISKHYKDHRENVITRQQLIQKVRQIAGDKLLASIIKSFRAKQIKTMQTKAMPPAEAGVRWTVKAGYHHKKLRELKKLPERSTRLIIMQAAATGPLVSL…
Vitisvinifera	VvSRO1	VIT_202s0012g01920.1	VIT_202s0012g01920.1	MEAKFEKVLDTNRRLVVGLKRKRVAQYAASWSPMHKNKLRKQRKSDGCRMNSGSNFGKTLLKYYSNFMKTELPQRIMFYLNGEWTDFPEDLVGLVKKDFQVKKSYIEVELNNNHFMIDFLHMKRVDLKTGMEKPIAWIDEAGNCFFPEIFSGDAESHNCCGHECGQQLLFREPYGSHDIKLQLEIDVNDAGHTNLKECSGESNPVIKHVLIDKNPASDQNDVEVEDSCNKTSDAKMDKAVGENQQMEGKLVTRIESVHGTLKFDTVRDMFISSMSPFISASILEVYQGSSSSMQARLELFQKQVEITSKYRTEANVRYAWLASSKEALSSIMMYGLGHYGTSQEKLTYGIGVHLTAVNFPYISANYCDVDENGVQHVVLCRVILGNMELVHLGSKQCYP…
	VvSRO2	VIT_202s0012g01930.1	VIT_202s0012g01930.1	METKLEKVLDSKSRIVVGWKRKRAAQYAAHLSALNSKKNRLCKRRKLDGYRMNYGPNFEKSLLKGYSNFMKTELPQRIMFYVNGDWKDFPQNIITLVRKDFQVRKSYTEVELNGNCFMLDFMHMVRVDMKTGLQQPIAWIDEAGNCFIPETFSGEDEIHYCCRHEYGKDQQLFFGEPYGSHDIKLQLEIDIKGVGHSKLEECSGESNALDKHFLIGKKPASNRFDVEVEDSNKMSDVKVDEAVGENQQIEGNLISRIGSSHGSLDFDTVRDMFTSGMNSLISADIIEVYRGSSASMEARLELFQKQIEITSKYRADANVKYAWLAASKEALSSIMMYGLGHCRPSKVKPVYGIGVHLTAANFSYPSVNYCDVDENGVQHIVLCRVIMGNMELVHPGSGQ…
	VvSRO3	VIT_201s0127g00680.1	VIT_201s0127g00680.1	MERVGAEEQVSMTVDDLEIIRPEAESDEFSSSSERVDLFAWNNGMIRVDEGNTEHDAIKKMFFSGMGPIGKGTDVVSIHKNSHSTLTGQARFESFRIFSQAVGKKCGGDANINYAWYGASRGEIYDIISHGFSRLQRPKAGELYGFGVYLSSAKFSIDCALSSAEDENGLRHVMLCRVILGNMETVCAGSQQFHPCSREYDSGVDDVSAPRRYIIWSAYMNSHILPSYIISFRAPLKGVPRRIQANLVKPTSPWMKFHTLLSVLSKVLPPHKMTQISKYHCDFHRKKITRQQLVKRLRQIAGDEMLTRVIKLYRTKDQTSCVLVP*
	VvSRO4	VIT_218s0001g08290.1	VIT_218s0001g08290.1	MASILPSEISRPKINVPRIGAVVPPNPRIRCKDYVQDCCSSHLEVQNQANFERSGVPSRFMFYRDGSWVDFPSQVLENVRPGFLERKTTMDVSIDGSEYRFDFLRMLQIDILTGKGRSIAWIDANGKCFFPKLFVSEEAADGSENLNTKSKIRFGEYFGKRKRERLESQEESEGNSSTNREAVSRRWNSNDQEAVSKRQRIQTTCDSETCKWPNVKLMKKGGRPYAMAEKFFLSRLKDTDPAVRVTAIHQCTWKGPLEKARWDVFHKQMERTKAAQGICNTTFAWHGTSAKTVASILTYGFGVRSQIDGSEPHGFGIYLSSVRLPHISAMMSEADDNEEKHVLLCRVILGNVEMVEDGPLPSSVNFDTGVDNIENPTWYVVKWANMNTHILPQCVVSYK…
	VvSRO5	VIT_217s0000g08370.1	VIT_217s0000g08370.1	METMAVEPWDVMYHTANHGDEASVSDCESGTTHNEHIHGLVRLDEDEKLHRIIEKALVSGLGPLRQHTSVVDIHRNGYASVISQARLQSFRIFGRAVEKKCEGNANVKFGWYSASKDEIGRIISHGFSHSNGLYGCGVYLYPHHSSIESMKSCVVDEDGLRHLLLCRVILGKMEVVHPGSQQYHPSSEDFDSGVDNLPAPKKYIVWSTHMNTHILPEYVVTFRAPPCLKGFLNTQGSLKKPTSPWMPFTTLISVLSKFLPPQSVNLIAKHHRDHRENKIPRHELIRLVRQIAGDKLLTVVIKSHRAKQLNSTNGSHQRKAQNGARNRMDSIQQPGSSIESIYLE*

## Sheet: Table S2
Table S2 qRT-PCR primers for expression analysis of StSRO genes family in Solanum tuberosum
Gene	Transcripts ID	Primer name	Primer sequence
Actin	-	Actin-F	AGAGGTTCCGTTGCCCAGAGG
	-	Actin-R	AGCCACCACTGAGCACAATGTTAC
StSRO1	PGSC0003DMT400063250	StSRO1-F	AGCAGCAGCAGTTCAACGGTAC
		StSRO1-R	ACTTCTGGATCTTGCACGTCATCG
StSRO2	PGSC0003DMT400012724	StSRO2-F	GAACTGGTTGATTCCGTCGGCTAG
		StSRO2-R	GGCATCCCACTCTCCTTGAAATTCC
StSRO3	PGSC0003DMT400035056	StSRO3-F	AGGCAGGTTTTCTTAGTGGAATGGG
		StSRO3-R	CTGACCTCGCTTGCCCCAATATAG
StSRO4	PGSC0003DMT400035039	StSRO4-F	AAGGCGGGTTTTCTTAGTGGAATGG
		StSRO4-R	AACCTCGCTTGCCCCAATATAGTTG
StSRO5	PGSC0003DMT400043197	StSRO5-F	CGTAGGCGATACTCTGTTGAAGTCC
		StSRO5-R	TGGCTCTTGCTTTGGCTGAACC
StSRO6	PGSC0003DMT400038368	StSRO6-F	GTCGGCTTGATGTCTCCAGAGTTAC
		StSRO6-R	CCACACCAACACCACGGGATTG
StSRO6	PGSC0003DMT400038368	StSRO6(pYES2)F	cttggtaccgagctcggatccATGGAGTCAAACTGGGTTGAAGTG
		StSRO6(pYES2)R	tacatgatgcggccctctagaTCAACAATTACTCTCCCCACTCG
StWRKY6	PGSC0003DMT400075091	StWRKY6(p1302)F	acgggggactcttgaccatggATGGATAACTCATCGACTG
		StWRKY6(p1302)R	aagttcttctcctttactagtCACTTGATCAAAATTCCAAAGACC
Gene-specific primers for real-time reverse transcription quantitative PCR (RT-qPCR) were designed by the Primer 6. F, forward; R, reverse.Lowercase letters represent vector homology arms.

## Sheet: Table S3
Table S3 Biophysical characteristics and subcellular localization of SRO genes in Solanum tuberosum
Gene ID	Transcript ID	Gene Name	Chromosome	Start to end	CDS (bp)	Amino acids (aa)	Molecular weight (kDa)	Theoretical (pI)	Instability index（II）	Aliphatic index	Grand average of hydropathicity (GRAVY)	Number of transmembrane helices	Subcellular localization
													vacuolar membrane	cytosol	chloroplast	nuclear	extr
PGSC0003DMG400024600	PGSC0003DMT400063250	StSRO1	3	54317167-54319695	1881	376	41.3915	8.52	49.19	68.46	-0.446	0		8	1	3	1
PGSC0003DMG400004959	PGSC0003DMT400012724	StSRO2	4	66111331-66113669	2039	510	57.0884	5.97	38.53	87.82	-0.234	0	1	2	6	4
PGSC0003DMG400013481	PGSC0003DMT400035056	StSRO3	5	8782621-8786419	1893	316	35.3776	7.64	47.2	88.2	-0.26	0		6		6	1
PGSC0003DMG400013476	PGSC0003DMT400035039	StSRO4	5	8680075-8682306	1203	300	33.72	9.16	53.99	89.7	-0.218	0		8	1	3	1
PGSC0003DMG401016766	PGSC0003DMT400043197	StSRO5	6	45228611-45234940	3876	594	67.4693	6.55	43.15	86.13	-0.414	0	1	3		10
PGSC0003DMG400014804	PGSC0003DMT400038368	StSRO6	8	49065466-49074527	2891	589	66.5427	6.63	46.06	81.19	-0.431	0	1	3	1	9

## Sheet: Table S4
Table S4 Gene pairs with interspecies collinearity
The potato SRO genes	SRO genes in different species
StSRO6	OsRCD1
StSRO6	AtSRO3
StSRO6	SolySRO4
StSRO5	SolySRO4
StSRO5	CaSRO1
StSRO1	CaSRO4

## Sheet: Table S5
Table S5 The protein sequence used to construct the evolutionary tree
>CaSRO1
MESNWVEVLDNGRRTAAVDSKSKVASQYVARIVGAGTENPEELSFQPNCSSFYSKLGKRKRTLDGESNCRSHLRKSTLKNYSNFMRSGLPQRVLFHQNGEWNDFPQDIVRIVKEDFRSKKAVIEVNFGGFHVILDILYMVQVNLVTGLEKPIAWIDEAGGCFFPDLGLISSKTHDYFEICSQRTESAAEPDRATKIKLHLEIDINRPNNCNLEECVEESNVGFKRIKIHSFKDNQEFAVDQNSDPKMDVVEENQQNQESLSPKLEDTLKLVDEESVKTMFARGMNTISMVDMVNVSQCSSKYMRNRLELFEKQVEITQKYRGKSNVRYAWLAASKEVVSTIMNYGLMHGVRGLKANLGVGVHLIALDYASKSAASCDIDENGVRYMVLCRVILGNEELL…
>CaSRO2
METKIVKVLDRSRNIVVDLKRKREAQFETHLSEATHMILPVRALLNSTVPLGKRAKLNGSGSRCGGYEFHQKESLLRYYLNFRKSGLPQRLMYYQKGQWTDFPENIVSMAKQDLQVKKSATEVVFNGKNYVLDFFHMMLLDLKSGVQQPIAWIDEAGKCFFPEVFGRCDELHECCHCEDNDCIDEYSETDGSNDLEMRLEIEVNGADISSLKESSGESNANVEQVNFCNELAAKNHVAKVDDNCVRMSYTKAKEDTAKYYQKVENAGCEYTNSDAVREMFLKGISSPASANIIELQRISSSFIEIRKELFQKQMEITRKHRGDAVLRYAWLPSSKGMITSIMKYGLANYGSSKTNSSYGVGVHLFPANCTDISAKYSDVDEDGVQYMILCRVIMGNMEL…
>CaSRO3
MDNFVKPQFFSFLREGAAVHHKIMAQPGFENRFAESTSSSNDEVQDAEVSDSESSIVGSKDQEKSSTGLMRIDESDKVYGIICNKFLSGLGCFGSSTQITAIHKETCSSFTKQAKLQSFIIYSKAVEKKCGGNANVKYAWYGASKDEIDNIFSYGFSHPSNNGDYSEAICLSPDDNSLDCLRIAVPDKNGIRHLLLCRVILGRSEVVHPGSGQCHPSSEEFDTGVDNLLSPRKYIVWTTHMNSYVFPEFVVSFSLTSHVKDSQRNGVRMENPKSPWITFPALIAALSKFLPPQTVKLITKYHRDHKGRKISRRDLIQQVRKLAGDELLTAIIKSCKNKQSKGSAGNSSTTSSINFEQRDGRCCACQKSC
>CaSRO4
MTNTPTPTASDSCSTAKIGGNESDAPAMLSSDVMYAAEPVVDGNKMKISVPLNRMISKDGVVVSPVTIEVPIPRTMLLPESGKWPDHAQLLFQNRMNFKESGKPVRFLFYKDGEWSRFGARVVDLLSSAFVSGKAMYEVDIGSFKFIFDFYRMIAIDFVRGIEMFIGWMDDNNKWYFPKVVFEGSEDAASRKIELELRTTGNKSTGPELGKRKRESEENKGEKGECSSLHMKDQRVVDTQLLPPKWPRTRPLREEETLSQMIKGLILSFLSADATVTGVHQCLRMGPRFEAFQNTVETVRRARGDANVEYAWYGTSPQNVDCIMHSGFEMSMIPIGSHTSGLGIYLTPIHSPQLSEMMAETDENGERHLILCRAVLGKLEQIDFTSEQLSPSSEDFDSG…
>CaSRO5
MEPKWVGVLDNGFRTVVGSNRKVVSQNLAPLFRASSEKLSIQSNCDSKLGKRKRVVVCESNCLSRLRKFVLKNNLNFMRSELPQRVLFHQNGEWIDFPQDVTLIVKEKFREKQAFIEVKVSDSHIRLDMLHMVQLDVINGSRKPIAWIDEAGNSFFPESFLISCEMHGYFETQSKRAEELMMTKPDNLKLQLKIDLNGPDNCNLEECVEESNVGFKRIRVNPLKNNQDFADDEKSDGKMERVAENKLNEETMSPDLVARQKLVDAEFVKNMFVMGMNFIPNADEIKITKCSSNYLRTRLELFEKQVEITEKYRGNANVQYAWLAASKDLISTIMKYGLAFGGAKDKTKFGVGVLLSAVHCASKSAINCDVEENGIRYMVFTRVILGNVEPLHCGSEQCH…
>SolySRO1
MENFVKPQFFSFLREEAAAVVQRYSPHHKFMAQSGFGNQFAESTSSSADDVQDPEVSDSESSVVGSVHEERSSGLMRIDEGDKIYGIISNKFLSGLGCFGLSTEITAIQKETCSSFVKQAKLQSFLIFSKAVEKKCSGNANVKYAWFGGSKDEISNIFSHGFSCRSNNGAYSQAICLSPD
DNSHDCLQAAVPDKNGVRHLLLCRVILGKTEVVHPGSGQCHPSSEEYDTGVDNLSSPRKFIVWSTHMNSYVFPEFMVSFRVSSHAKGEHLSSALRELECFRGCAGLLILVLIYAESQRNAVPIQNPKSPWITFPALISALSKFLPPQTVKLITKYHNDHKGRKITRRDLIQQVRKLAGDELLTAIIK
>SolySRO2
MDQLGNDDQVSMTIENHEMLFSSDSEVESPSPRTNYHFRSLKSNEVMKLEEGDQDHDLIKAGFLSGMGQLGNEIEVVAVHKNSCSTILGQARSESFRIYSEAMRKKCSGDANIKYAWFGSSKDEICNIISHGFSTIMEPNYGDCFGNGVHLYPANIDGVFSAVEDENGLRHMLLCRVILGNTEVIEASSKQFQPTCQDFDSGVDNYLAPKTYIIWPSNMNSHILPNFLVSFKGPLSLGTSLKIKIPLKPTPRIKFSNLLRVLSNFLHPSRMVLITKKYEDFQKNKISKMIFVQKLRQIAGDTSLLKSCHDIVSKH
>SolySRO3
MNQFGDHNDQVSMTIDDEKMLLSFDSQVESPSSTYHDSLRSFKKNGMIELEERNKEHDLIKAGFLSGMGQLGKEVEVVAIHKNSCSTILGQARLESFRIYSEAMRKKCGGNANIKYAWFGSSKDEICNIISHGFSTITEPKSGECFGMGVHLYPANIHGVLSALEDENGLRHMLLCRVILGNTEIIEASSKQFQPTCQDFDSGVDNYLAPKTYIIWPSYMNSHILPNFLVLLRKSRRFLQ
>SolySRO4
MEPKGVGFLDSGRRTVVGEKSKVVTQNLAHLLRASSEKISIQSNCDRKLEKRKRIVHCESNSQSHLRISEHKNYLNFKRSRLPLRVLFYQNGEWTDFPQDIIPIVKEDFRAKKTVIEVKVCDFHIILDILHMVQIDVINGLQKPIAWIDEVGRCFFPESYLISSEMLGNFETLSKRTEEFMTTEPDRITDMKLQLDTDLNGLDNRNLEEDVEESNIGYKRNKVCPLKDSQEVADYKKSDAKIAQVAENKQNQETPSPDLEASLKFVNAESVKNMFIMGMNVNPNKCEIKINKCSSNYLTTRLELFEKQVEITQKYRGNSNVRYAWLAASKDLISTIMKYGLAPGGSKYRPKFGVGVHLSALHCASKSAINCDADENGVHYMVFARVILGNMEPLHCGSE…
>SolySRO5
METKFEKVLDRSRNIVVDLKRKREARCETHLSGATHVILPVRPLLNSSIRPLGKRTKLNGSRSRCGGYKFHQKESLLRYYLNFRRSGLPQRLMYYQNSQWTDFPENIVSMAKQDLRTKRSAREVVFNGNNYVLDFFHMMLLDLKSGMQQPIAWIDEAGKCFFPEVFAYCDELHEPCHCEDNDCVDVDSETEGSNDLELRLEIEVNGADISSSEESSGESNANFEQVNFCHEPAAKNRIAEVGDDHVRISDTKAKDDSVENYQMVENAVGRYDSKWKHMDPKAVSEMFLKGISSSASANIIDLQRISSSFMEVRKELFQKQVEILRKHRGDATVSYAWLPSSKGMITSIMKYGLANYYPSRTNSSYGIGVHLFPANCSEISAKCSDVDENGVQYMVLCRV…
>SolySRO6
MESNWVEVLDNDRRTADVDSKSKVASQYVARIVGAGTEKLEELSFQPNCSSFYSTLGKRKRTVEGETNCRSHLRKSTVKNYSNFIKSGLPQRVLYHQNGEWNDFPQDIVRIVKEDFRAKKAVIEVNFGGFHVILDILYMVQVNLVTGLEKPIAWIDEAGGCFFPDLCLVSCKAHDNIEIQSQRTEGFSAAEPDRATNIKLHLEIDINGPNNCKLDEGMEESNVRVKRIKVDPLKDNQQFAVDQKSYPKMEVVAENQQDQESLSPILEDTLKLVDAESVKTMFVKGMNTIYMVDIVKISQCSSKYMRNRLELFEKQAEITQKYRGKSNVRHAWLAASKEVVSTIMNYGLMHGACGQKTKLGVGVHLIAQDCASKSAASCDIDENGIRYMVLCRVILGNEE…
>StSRO1
MENFVKPQFFSFLREEAAAAVQRYSPHHKFMAHSGFGNQFAESTSSSADDVQDPEVSDSESSVVGSVHEERSSGLMRIDEGDKIYGIISNKFLSGLGCFGLSTEITAIHKETCSSFIKQAKLQSFLIFSKAVEKKCGGNANVKYAWFGASNDEINNIFSHGFSHSSNGAYSQAICLSPDDNSHDCLQAAVPDKNGVRHLLLCRVILGKTEVVHPGSGQCHPSSEEYDTGVDNLSSPRKYIVWSTHMNSYVFPEFMVSFRVSSHAKESQRNTVPVQNPKSPWITFPALISALSKFLPPQTVKLITKYHNDHKGRKITRRDLIQQVRKLAGDELLTAIIKSCKNKQQSKGSTGNSSSTSSINFEQRDGRCCACQKSC
>StSRO2
MSIASVGSCAPMIAGDEVDSISAVFNGNKVEIVIPFERAAGGSGDDGVYETKVRVEVPIPRNWLIPSARSTDHSQLLVQNHRNFKESGMPVRFMVFKDGSWVDFEKKAMDVLVSAFVSGEAMVEMEMEGCKLIFDFYRMIGINLDSGNELPIAWIDVGGKGFYPKVFIEGSENLDKNEVN
>StSRO3
MDQLGDDDQVSMTIESREILFSSDSEVESPSPTSNCHFRSLKRNGIIKLEERDQEHDLIKAGFLSGMGQLGNEIEVVAIHKNSRSTILGQARSESFSIYSEAMRKKCGGDANIKYAWIGSSKDEICKIISHGFSTIMEPKSGDCFGNGVHLYPTNIDGVFSAVEDENGLRHMLLCRVILGNTEVIEASSKQFQPTCQDFDSGVDNYFAPKTYIIWPSNMNSHILPIFLVSFKGPLLLGNS
>StSRO4
MLLSFDSEAESPSPALHNSFRSFKRNGMIELEERNKEHDLIKAGFLSGMGHLGKEVEIVAIHKNSCSTILGQARLESFRIYSEAMRKKCGGNANIKYAWFGSSKDEICNIISHGFSTITEPKSGECFGIGVHLYPANIHGVLSAVEDEDGLRHMLLCRVILGNTEVIEASSKQFQPTCQDFDSGVDNYLAPKTYIIWPSNMNSHILPNFVVSYRCPSCLLGASSKIKKVSPKSNSRIKFH
>StSRO5
MEPKGVGLLDSGRRTVVGAKSKVASQNLAHLFRASSEKISIQSNCDSKLEKRKRIVDCESNCQSHLRKSVHKNYLNFKRSRLPQRVLFYQNGEWTDFPQDIIPIVKEDFQAKKAVIEVKVCDFHIILDTLHMVQIDMINGLQKPIAWIDEVGRCFFPESYLISSEMHGNFETLLKRTEEFMTTEPARITDIKLQLDIDLNGLDNRNLEEDVEESNIGYKRIKVYPPKDSQEFADYKKSDA
>StSRO6
MESNWVEVLDNDRRTADVDSKSKVASQYVARIVGAGTEKLEELSFQPNCSSFYSKLGKRKRTVEGESNCRSHLRKSTLKNYSNFIKSSGLPQRVLYHQNGEWNDFPQDIVRIVKEDFRAKKAVIEVNFGGFHVILDILYMVQVNLVTGLEKPIAWIDEAGGCFFPDLCLLSCKMHDNFEIQSQRTEEFSAAEPDRATNIKLHLEIDFNGPNNCKVDEGVEESNVRVKRIKVDPLKDNQQFA
>NtaSRO1
ASWLFKCSLSIDFVSIKLSLSIDYFNSLPVDKMESKLFELLDNGHRTVVGSKRKVASQNLAHLFRANSEKLSIQSNHDSKLGERKRTAECESNFQSHLSKSLLKNYLNFMRSRLPQRVLFYQNGEWTDFPQDIILIVKEDFRAKKAVIEVKVGGFHLMLDILYMVQIDLINGLHKPIAWIDEAGGCFFPESYLVSCE
>NtaSRO2
METKYGKVLDRSQNIVVDLKRKRAARCETHLSGATHMIFPVRTSLNSSIRPLGKRRKLNGSNSTCGGCAFHLRKSLLRYYLNFRKSGLPQRLMYYQKGQWTDFPENIVTMAKKDLRIKKSVTEVEFNGKIFVLDFFHMMRLDLKSGLQQPIAWIDEAGNCFFPELFANCDELHECCHSEHKDSIEVDSETEGSNDLEMQLEIEINGADMSSLKESSGESNAIVKQVNLCHKPAAKNCTAEVGDNCVRLSDTKSMDDSTENHQMVENAACCKWEYLDPDVVGEMFLKGIDSPSGAKIFELHRVSSTFMEVRKELFQKQVEITKKQRGGASLSYAWLPSSKGMITSIMKYGLANYDLSKSKSRYGVGVHLFPANCTEISAKYCDYDENGVQHMILCRVIMG…
>NtaSRO3
MEKSGLYKDHHPVQKLASWLFKCSLSIDFVSIKYSLSIDYFNSLPVDKMESKLFEVLDNGHRTVVGSKRKVASQNLSHLFRASSEKLSIQSNHDSKLGERKRTAECESNYQSHLRKSLLKNYLNFMRSRLPQRVLFYQNGEWTDFPQDIILIVKEDFRAKKAVIEVKVGGFHLMLDILYMVQIDLINGLHKPIAWIDEAGGCFFPESYLVSCEMHGNFKSQSKRIEEFMAIEPDRVADIKLQLEIDFNGLENSNSNLEEYVEESNVGFKRIKVNPVKDNQECADDKKSDAKVEQVAENKQNQEIRTLAVVALKLVDAESVKNMFVMGMNIIPKMDEIKITKCSSNYLKTRLELFEKQIEITQKYRGNANVRYAWLAASKDLLSTIMNYGLALGGPKHKT…
>NtaSRO4
MDLNCKVLKFMMMKTPADSIPPLKIAGDQNNVVSPVIDGNKVKIQVPVPRKIVGGEDDVVDKKKLKIEVPIPRELLFPSAETASCYDHAQLLVQNYGNFKKSGEPVRFMFYKDGSWVNFEKNVMEVMVSGFVSGKPMIDVEMEGLKCLFDFYRMLEIDLDTGKERSISWIDVNGKCFFPKVFIDSSENSDDKNHEIKASNVNENFSSENPKIEIEIRISDDNSDKEVNNSGEELKLGKRKRGSEENEVEEKGERSSSNAKERRVIAATELHSPRWPKARSLREEEKGYQMVKGLLLSGLRTVDPGVTVTSIHQCVRTGPLEKARLEVFQTNMEIIKRTRGGNLNVVYAWYGTSAKNVEIILRHGFGMPSVVHGSNAHGVGVYLSPLRQPQNSAIMSEVD…
>NtaSRO5
MVPNKLNAKRRRLEDPAESASSSSNPRNKIEVRSPTTTDRMCGVSCSKTQERAQLFGNNDLVRLNQDHKVYKVVTDKFVSGLGALGSSLQVEAIHMNVRSSFVSQTRFQSFLLVAKTMEKKYNGHASKKLGWYGTSKEKIIDIISNGFVPLSYRHGVQFSARDYPLDCLQTAVQDKDGLRHLLLCKLVLGRSELVIPGSGQFQPSSEDLDSGVDSFTSPRTYIVWSSRLSTHVFPEVIVSVRVSPHSKGVDEYRPTLSKNVNLRISVDALITRLSRILPSHAIKLIKEYYNDRQKGKTTAQEFVRQVSQVAGNSLLISIIKSISAQVNHHNLFTEAIIRHCPVLLKTRSSWDICPSKVMVVSNCQLTNHIVT
>NtaSRO6
METKYGKVLDRSQNIVVDLKRKRVARCETHLSGATHMIFPVRSSLNSSIRPLGKRRKLNGSNSTCGGCAFHPRESLRRYYLNFRKSGLPQRLMYYQKGQWTDFPENIVTMAKKNLRIKKSVTEVEFNGKKFVLDFFHMLRLDLKSGLQQPIAWIDEAGNCFFPELFANCDELHECCHSEHKDSIEVDSETEGSNDLEMQLEIEINGADMSSLKESSGESNAIVKQVNLCHKPAAKNCTAEVGDNCVRVSDTKSKDDSAENHQLVEYAAGCKWEYLDPDVVGEIFLKGINSPSGAKIFELHRVSSTFMEVRRELFQKQVEITKKQRGGASLSCAWLPSSKGMITNIMKYGLANYDLSKSKSRYGVGVHLFPANCTEISAKYCDYDENGVQHMILCRVIMG…
>NtaSRO7
MENFVKPQFFSLLRGEATVQKYPNNHKILAPPNMYQPKFEQQSAESTSSSNDDVQDPEVSDSESSVIGSKYQEKNTGLMRVDEGDKVYGIIREKFMSGLGALGASTQITAIHKETCSSFTKQAKLQSFLIFSKAVEKKCGGNNANVKYAWFGASKDEINNIFSHGFVPSSNNGTYSHAICLSPDNYPLDCLQNAVADKNGIRDLLLCRVILGKSEVVHPGTGQWHPSSDEFDTGVDNLLSPRKYIVWSTHMNSYVFPEFMVSFRVTSHVKESQRNGVPAKNPNSPWISFPALISALSKFLPPHTIKLITKYHSDHKERKMTRRDLIQQVRKLAGDDLLTAIIKSCKYKSLAFHFTYLNTTHELLAPEMFYQDQPGSHPTSAQFILDNEMEKAVLAKRVVE
>NtaSRO8
MDFNCNVLKFMMMKTPADSIPPLKIAGDQNNVVSPVIDGNKLKIHVPVPRKIVGGEDDVVDKKKVKIEVPIPRELLFPSAETASCTDHAQLLVQNYGNFKKSGKPVRFMFYKDGSWVNFEKNVMDVMVSGFVSGKPMIDVEMEGLKCLFDFYRMLEIDLDTGKERSISWIDVNGKCFFPKVFIDSSENSNDKNQEIEASNVNEKISSENLKIEIEIRISDDNSDKEVNNSGEELKLGKRKRGSEENEVEKKGERSSSNAKERRVIAATELHSPRWPKARSLREEEKGYQMVKGLLLSGLRTVDPGVTVTSIHQCVRTGPLEKARLEVFHTNMEIIKRARGGNLNVVYAWYGTSAKNVEIILRHGFGMPSVVHGSNAHGLGVYLSPLRQPQNSAMMSEVD…
>NtaSRO9
LHFILLNVASPEFVMADLRDTSLGYNNGRRTAADNSNSEVASQCVARIVGARSEKLEELIFQLNCSSFYNKLGKRKRTVGCESNCRSHLRKLIPKNYSNFMKSGLPQRVLFHQNGEWNDFPEDIIRLVKEDFRAKKAVIEVNCGCFHVILDILYMIQVDLITGLEKPIAWIDEAGGCFFPELCLVSCKMHDNFDIQSQRTDDFSTAEPDRATKIKLHLEIDFHGPNNCNLEECVEESNVSYKKTKVNPFKDNQEFADDKISDAKMEIVVDNQQNQEILSPKLEDALKLVDAESVKNMFVKGVNGIYKVDIVKVSQCSSKYLRSRLELFEKLVEITQNYRGNSNVRYAWLAASKELVCTIMNYGLMHGSSGQNTNLGVGVHLIAQDRASKSAASCDVDEN…
>NtaSRO10
MAPNKLNVKRRRLEDPAESASSSTNPRNKFEVRTPTTPDRMCGVSGSKTQENAQLFGNNDLVRLNQDHTVYKVVKDKFVSGLGALGSSLQVEAIHMNVRSSLVSQTRFQSFLLVAKAMEKKYNGHASKKLGCYRHGVQFSARDYPFDCLQTAIQDKDGLRHLLLFKLVLGRSELVISGSGQFQPSSEDIDFEVDSFTSPRTYIVWSSRLSTHVFPEVIVSFRVFDRPTLSKNVNLTIPFDALITRLSKILPSHAIKLIKEYYNDRQKGKTTAQEFVRQVSQVAGNSLLISIIKSISAQVNHHNLFTEAIIRRCPVLLKTRSSWDICPSKVMAVSNCQLTNHIVN
>NtaSRO11
MEQLREEDQVSMTIENPEMLFSSDSEAESSNPRLEHNFRLFKTNGMIKLEENDKEHGLIKSGFITCMGPLAKEVEVVAIHKNSCSTILGKARLEAFRIFSEAVREKCNGNANIKYAWFGSSKEEICKIISHGFSRTTEAKSGECFGIGVYLYPANIDGVLSTVEDENGLRHMLLCRVILGNTEVIPAGSTQSQPTSDSEDFDSGVDNIVAPTRYTIWGSHMNSHIFPNFLLSFSFRLGNSSKINKVPLKGTPRIKFPDLLRALSQFLHPSRMALISKYYEDFQRNKITKLVLVRKLRQIAGDTSLKAVMKLYPYKDIGNKSLLLRCKGM

## Sheet: Table S6
Table S6 Multispecies_gene_exon_info
Chr No.	10 databases	Gene location information						Annotated information on the genes of reported species
1	araport11	mRNA	11612118	11616218	.	+	.	ID=transcript:AtRCD1;Parent=gene:AT1G32230;biotype=protein_coding;transcript_id=AtRCD1
1	araport11	five_prime_UTR	11612118	11612368	.	+	.	Parent=transcript:AtRCD1
1	araport11	five_prime_UTR	11612738	11612860	.	+	.	Parent=transcript:AtRCD1
1	araport11	five_prime_UTR	11613313	11613426	.	+	.	Parent=transcript:AtRCD1
1	araport11	CDS	11613427	11614550	.	+	0	ID=CDS:AtRCD1;Parent=transcript:AtRCD1;protein_id=AtRCD1
1	araport11	CDS	11614659	11614906	.	+	1	ID=CDS:AtRCD1;Parent=transcript:AtRCD1;protein_id=AtRCD1
1	araport11	CDS	11615232	11615311	.	+	2	ID=CDS:AtRCD1;Parent=transcript:AtRCD1;protein_id=AtRCD1
1	araport11	CDS	11615402	11615560	.	+	0	ID=CDS:AtRCD1;Parent=transcript:AtRCD1;protein_id=AtRCD1
1	araport11	CDS	11615644	11615739	.	+	0	ID=CDS:AtRCD1;Parent=transcript:AtRCD1;protein_id=AtRCD1
1	araport11	CDS	11615832	11615894	.	+	0	ID=CDS:AtRCD1;Parent=transcript:AtRCD1;protein_id=AtRCD1
1	araport11	three_prime_UTR	11615895	11616218	.	+	.	Parent=transcript:AtRCD1
2	araport11	mRNA	14916690	14920482	.	-	.	ID=transcript:AtSRO1;Parent=gene:AT2G35510;biotype=protein_coding;transcript_id=AtSRO1
2	araport11	three_prime_UTR	14916690	14916897	.	-	.	Parent=transcript:AtSRO1
2	araport11	CDS	14916898	14917005	.	-	0	ID=CDS:AtSRO1;Parent=transcript:AtSRO1;protein_id=AtSRO1
2	araport11	CDS	14917084	14917251	.	-	0	ID=CDS:AtSRO1;Parent=transcript:AtSRO1;protein_id=AtSRO1
2	araport11	CDS	14917353	14917432	.	-	2	ID=CDS:AtSRO1;Parent=transcript:AtSRO1;protein_id=AtSRO1
2	araport11	CDS	14917723	14917967	.	-	1	ID=CDS:AtSRO1;Parent=transcript:AtSRO1;protein_id=AtSRO1
2	araport11	CDS	14918093	14919198	.	-	0	ID=CDS:AtSRO1;Parent=transcript:AtSRO1;protein_id=AtSRO1
2	araport11	five_prime_UTR	14919199	14919308	.	-	.	Parent=transcript:AtSRO1
2	araport11	five_prime_UTR	14919733	14919835	.	-	.	Parent=transcript:AtSRO1
2	araport11	five_prime_UTR	14920174	14920482	.	-	.	Parent=transcript:AtSRO1
1	araport11	mRNA	8350728	8352791	.	+	.	ID=transcript:AtSRO2;Parent=gene:AT1G23550;biotype=protein_coding;transcript_id=AtSRO2
1	araport11	five_prime_UTR	8350728	8350911	.	+	.	Parent=transcript:AtSRO2
1	araport11	CDS	8350912	8351399	.	+	0	ID=CDS:AtSRO2;Parent=transcript:AtSRO2;protein_id=AtSRO2
1	araport11	CDS	8351579	8351817	.	+	1	ID=CDS:AtSRO2;Parent=transcript:AtSRO2;protein_id=AtSRO2
1	araport11	CDS	8351901	8352031	.	+	2	ID=CDS:AtSRO2;Parent=transcript:AtSRO2;protein_id=AtSRO2
1	araport11	CDS	8352119	8352232	.	+	0	ID=CDS:AtSRO2;Parent=transcript:AtSRO2;protein_id=AtSRO2
1	araport11	three_prime_UTR	8352233	8352253	.	+	.	Parent=transcript:AtSRO2
1	araport11	three_prime_UTR	8352553	8352791	.	+	.	Parent=transcript:AtSRO2
1	araport11	mRNA	26548952	26550636	.	-	.	ID=transcript:AtSRO3;Parent=gene:AT1G70440;biotype=protein_coding;transcript_id=AtSRO3
1	araport11	three_prime_UTR	26548952	26549135	.	-	.	Parent=transcript:AtSRO3
1	araport11	three_prime_UTR	26549342	26549353	.	-	.	Parent=transcript:AtSRO3
1	araport11	CDS	26549354	26549449	.	-	0	ID=CDS:AtSRO3;Parent=transcript:AtSRO3;protein_id=AtSRO3
1	araport11	CDS	26549529	26549647	.	-	2	ID=CDS:AtSRO3;Parent=transcript:AtSRO3;protein_id=AtSRO3
1	araport11	CDS	26549733	26549971	.	-	1	ID=CDS:AtSRO3;Parent=transcript:AtSRO3;protein_id=AtSRO3
1	araport11	CDS	26550057	26550520	.	-	0	ID=CDS:AtSRO3;Parent=transcript:AtSRO3;protein_id=AtSRO3
1	araport11	five_prime_UTR	26550521	26550636	.	-	.	Parent=transcript:AtSRO3
3	araport11	mRNA	17592558	17594132	.	+	.	ID=transcript:AtSRO4;Parent=gene:AT3G47720;biotype=protein_coding;transcript_id=AtSRO4
3	araport11	five_prime_UTR	17592558	17592683	.	+	.	Parent=transcript:AtSRO4
3	araport11	five_prime_UTR	17592769	17592770	.	+	.	Parent=transcript:AtSRO4
3	araport11	CDS	17592771	17593249	.	+	0	ID=CDS:AtSRO4;Parent=transcript:AtSRO4;protein_id=AtSRO4
3	araport11	CDS	17593343	17593590	.	+	1	ID=CDS:AtSRO4;Parent=transcript:AtSRO4;protein_id=AtSRO4
3	araport11	CDS	17593663	17593772	.	+	2	ID=CDS:AtSRO4;Parent=transcript:AtSRO4;protein_id=AtSRO4
3	araport11	CDS	17593853	17593966	.	+	0	ID=CDS:AtSRO4;Parent=transcript:AtSRO4;protein_id=AtSRO4
3	araport11	three_prime_UTR	17593967	17594132	.	+	.	Parent=transcript:AtSRO4
5	araport11	mRNA	25097944	25099907	.	+	.	ID=transcript:AtSRO5;Parent=gene:AT5G62520;biotype=protein_coding;transcript_id=AtSRO5
5	araport11	five_prime_UTR	25097944	25098070	.	+	.	Parent=transcript:AtSRO5
5	araport11	CDS	25098071	25098528	.	+	0	ID=CDS:AtSRO5;Parent=transcript:AtSRO5;protein_id=AtSRO5
5	araport11	CDS	25098617	25098861	.	+	1	ID=CDS:AtSRO5;Parent=transcript:AtSRO5;protein_id=AtSRO5
5	araport11	CDS	25098945	25099063	.	+	2	ID=CDS:AtSRO5;Parent=transcript:AtSRO5;protein_id=AtSRO5
5	araport11	CDS	25099157	25099264	.	+	0	ID=CDS:AtSRO5;Parent=transcript:AtSRO5;protein_id=AtSRO5
5	araport11	three_prime_UTR	25099265	25099907	.	+	.	Parent=transcript:AtSRO5
3	pgsc	mRNA	54317167	54319695	.	-	.	ID=transcript:StSRO1;Parent=gene:PGSC0003DMG400024600;biotype=protein_coding;transcript_id=StSRO1
3	pgsc	three_prime_UTR	54317167	54317560	.	-	.	Parent=transcript:StSRO1
3	pgsc	CDS	54317561	54317659	.	-	0	ID=CDS:StSRO1;Parent=transcript:StSRO1;protein_id=StSRO1
3	pgsc	CDS	54318054	54318149	.	-	0	ID=CDS:StSRO1;Parent=transcript:StSRO1;protein_id=StSRO1
3	pgsc	CDS	54318233	54318369	.	-	2	ID=CDS:StSRO1;Parent=transcript:StSRO1;protein_id=StSRO1
3	pgsc	CDS	54318455	54318696	.	-	1	ID=CDS:StSRO1;Parent=transcript:StSRO1;protein_id=StSRO1
3	pgsc	CDS	54318783	54319339	.	-	0	ID=CDS:StSRO1;Parent=transcript:StSRO1;protein_id=StSRO1
3	pgsc	five_prime_UTR	54319340	54319695	.	-	.	Parent=transcript:StSRO1
4	pgsc	mRNA	66111331	66113669	.	+	.	ID=transcript:StSRO2;Parent=gene:PGSC0003DMG400004959;biotype=protein_coding;transcript_id=StSRO2
4	pgsc	five_prime_UTR	66111331	66111593	.	+	.	Parent=transcript:StSRO2
4	pgsc	CDS	66111594	66112675	.	+	0	ID=CDS:StSRO2;Parent=transcript:StSRO2;protein_id=StSRO2
4	pgsc	CDS	66112773	66113014	.	+	1	ID=CDS:StSRO2;Parent=transcript:StSRO2;protein_id=StSRO2
4	pgsc	CDS	66113101	66113213	.	+	2	ID=CDS:StSRO2;Parent=transcript:StSRO2;protein_id=StSRO2
4	pgsc	CDS	66113331	66113426	.	+	0	ID=CDS:StSRO2;Parent=transcript:StSRO2;protein_id=StSRO2
4	pgsc	three_prime_UTR	66113427	66113669	.	+	.	Parent=transcript:StSRO2
5	pgsc	mRNA	8782621	8786419	.	+	.	ID=transcript:StSRO3;Parent=gene:PGSC0003DMG400013481;biotype=protein_coding;transcript_id=StSRO3
5	pgsc	five_prime_UTR	8782621	8782871	.	+	.	Parent=transcript:StSRO3
5	pgsc	CDS	8782872	8782987	.	+	0	ID=CDS:StSRO3;Parent=transcript:StSRO3;protein_id=StSRO3
5	pgsc	CDS	8783074	8783430	.	+	1	ID=CDS:StSRO3;Parent=transcript:StSRO3;protein_id=StSRO3
5	pgsc	CDS	8784516	8784754	.	+	1	ID=CDS:StSRO3;Parent=transcript:StSRO3;protein_id=StSRO3
5	pgsc	CDS	8785490	8785776	.	+	2	ID=CDS:StSRO3;Parent=transcript:StSRO3;protein_id=StSRO3
5	pgsc	three_prime_UTR	8785777	8786419	.	+	.	Parent=transcript:StSRO3
5	pgsc	mRNA	8680075	8682306	.	+	.	ID=transcript:StSRO4;Parent=gene:PGSC0003DMG400013476;biotype=protein_coding;transcript_id=StSRO4
5	pgsc	five_prime_UTR	8680075	8680130	.	+	.	Parent=transcript:StSRO4
5	pgsc	CDS	8680131	8680192	.	+	0	ID=CDS:StSRO4;Parent=transcript:StSRO4;protein_id=StSRO4
5	pgsc	CDS	8680311	8680667	.	+	1	ID=CDS:StSRO4;Parent=transcript:StSRO4;protein_id=StSRO4
5	pgsc	CDS	8681003	8681244	.	+	1	ID=CDS:StSRO4;Parent=transcript:StSRO4;protein_id=StSRO4
5	pgsc	CDS	8681570	8681706	.	+	2	ID=CDS:StSRO4;Parent=transcript:StSRO4;protein_id=StSRO4
5	pgsc	CDS	8681804	8681908	.	+	0	ID=CDS:StSRO4;Parent=transcript:StSRO4;protein_id=StSRO4
5	pgsc	three_prime_UTR	8681909	8681909	.	+	.	Parent=transcript:StSRO4
5	pgsc	three_prime_UTR	8682064	8682306	.	+	.	Parent=transcript:StSRO4
6	pgsc	mRNA	45228611	45234940	.	-	.	ID=transcript:StSRO5;Parent=gene:PGSC0003DMG401016766;biotype=protein_coding;transcript_id=StSRO5
6	pgsc	three_prime_UTR	45228611	45228954	.	-	.	Parent=transcript:StSRO5
6	pgsc	CDS	45228955	45229062	.	-	0	ID=CDS:StSRO5;Parent=transcript:StSRO5;protein_id=StSRO5
6	pgsc	CDS	45229487	45229582	.	-	0	ID=CDS:StSRO5;Parent=transcript:StSRO5;protein_id=StSRO5
6	pgsc	CDS	45229695	45229859	.	-	0	ID=CDS:StSRO5;Parent=transcript:StSRO5;protein_id=StSRO5
6	pgsc	CDS	45230598	45230671	.	-	2	ID=CDS:StSRO5;Parent=transcript:StSRO5;protein_id=StSRO5
6	pgsc	CDS	45231474	45231715	.	-	1	ID=CDS:StSRO5;Parent=transcript:StSRO5;protein_id=StSRO5
6	pgsc	CDS	45232094	45233193	.	-	0	ID=CDS:StSRO5;Parent=transcript:StSRO5;protein_id=StSRO5
6	pgsc	five_prime_UTR	45233194	45234940	.	-	.	Parent=transcript:StSRO5
8	pgsc	mRNA	49065466	49074527	.	-	.	ID=transcript:StSRO6;Parent=gene:PGSC0003DMG400014804;biotype=protein_coding;transcript_id=StSRO6
8	pgsc	three_prime_UTR	49065466	49066030	.	-	.	Parent=transcript:StSRO6
8	pgsc	CDS	49066031	49066087	.	-	0	ID=CDS:StSRO6;Parent=transcript:StSRO6;protein_id=StSRO6
8	pgsc	CDS	49067676	49067771	.	-	0	ID=CDS:StSRO6;Parent=transcript:StSRO6;protein_id=StSRO6
8	pgsc	CDS	49067859	49068029	.	-	0	ID=CDS:StSRO6;Parent=transcript:StSRO6;protein_id=StSRO6
8	pgsc	CDS	49069109	49069206	.	-	2	ID=CDS:StSRO6;Parent=transcript:StSRO6;protein_id=StSRO6
8	pgsc	CDS	49070512	49070753	.	-	1	ID=CDS:StSRO6;Parent=transcript:StSRO6;protein_id=StSRO6
8	pgsc	CDS	49071184	49072289	.	-	0	ID=CDS:StSRO6;Parent=transcript:StSRO6;protein_id=StSRO6
8	pgsc	five_prime_UTR	49072290	49072412	.	-	.	Parent=transcript:StSRO6
8	pgsc	five_prime_UTR	49072770	49072888	.	-	.	Parent=transcript:StSRO6
8	pgsc	five_prime_UTR	49074214	49074527	.	-	.	Parent=transcript:StSRO6
Chr10	MSU_osa1r7	mRNA	23035339	23039714	.	-	.	ID=OsSRO1a;Name=OsSRO1a;Parent=LOC_Os10g42710
Chr10	MSU_osa1r7	five_prime_UTR	23039379	23039714	.	-	.	ID=OsSRO1a:utr_3;Parent=OsSRO1a
Chr10	MSU_osa1r7	five_prime_UTR	23038497	23038667	.	-	.	ID=OsSRO1a:utr_2;Parent=OsSRO1a
Chr10	MSU_osa1r7	CDS	23037388	23038496	.	-	.	ID=OsSRO1a:cds_1;Parent=OsSRO1a
Chr10	MSU_osa1r7	CDS	23036861	23037102	.	-	.	ID=OsSRO1a:cds_2;Parent=OsSRO1a
Chr10	MSU_osa1r7	CDS	23036657	23036745	.	-	.	ID=OsSRO1a:cds_3;Parent=OsSRO1a
Chr10	MSU_osa1r7	CDS	23036186	23036368	.	-	.	ID=OsSRO1a:cds_4;Parent=OsSRO1a
Chr10	MSU_osa1r7	CDS	23035994	23036089	.	-	.	ID=OsSRO1a:cds_5;Parent=OsSRO1a
Chr10	MSU_osa1r7	CDS	23035678	23035734	.	-	.	ID=OsSRO1a:cds_6;Parent=OsSRO1a
Chr10	MSU_osa1r7	three_prime_UTR	23035339	23035677	.	-	.	ID=OsSRO1a:utr_1;Parent=OsSRO1a
Chr3	MSU_osa1r7	mRNA	36001919	36007511	.	-	.	ID=OsSRO1b;Name=OsSRO1b;Parent=LOC_Os03g63770
Chr3	MSU_osa1r7	five_prime_UTR	36007212	36007511	.	-	.	ID=OsSRO1b:utr_3;Parent=OsSRO1b
Chr3	MSU_osa1r7	five_prime_UTR	36005333	36005502	.	-	.	ID=OsSRO1b:utr_2;Parent=OsSRO1b
Chr3	MSU_osa1r7	CDS	36004233	36005332	.	-	.	ID=OsSRO1b:cds_1;Parent=OsSRO1b
Chr3	MSU_osa1r7	CDS	36003878	36004119	.	-	.	ID=OsSRO1b:cds_2;Parent=OsSRO1b
Chr3	MSU_osa1r7	CDS	36003713	36003774	.	-	.	ID=OsSRO1b:cds_3;Parent=OsSRO1b
Chr3	MSU_osa1r7	CDS	36002778	36002963	.	-	.	ID=OsSRO1b:cds_4;Parent=OsSRO1b
Chr3	MSU_osa1r7	CDS	36002591	36002686	.	-	.	ID=OsSRO1b:cds_5;Parent=OsSRO1b
Chr3	MSU_osa1r7	CDS	36002232	36002300	.	-	.	ID=OsSRO1b:cds_6;Parent=OsSRO1b
Chr3	MSU_osa1r7	three_prime_UTR	36001919	36002231	.	-	.	ID=OsSRO1b:utr_1;Parent=OsSRO1b
Chr3	MSU_osa1r7	mRNA	6895178	6898428	.	+	.	ID=OsSRO1c;Name=OsSRO1c;Parent=LOC_Os03g12820
Chr3	MSU_osa1r7	five_prime_UTR	6895178	6895269	.	+	.	ID=OsSRO1c:utr_1;Parent=OsSRO1c
Chr3	MSU_osa1r7	CDS	6895270	6896171	.	+	.	ID=OsSRO1c:cds_1;Parent=OsSRO1c
Chr3	MSU_osa1r7	CDS	6896502	6896749	.	+	.	ID=OsSRO1c:cds_2;Parent=OsSRO1c
Chr3	MSU_osa1r7	CDS	6896831	6896973	.	+	.	ID=OsSRO1c:cds_3;Parent=OsSRO1c
Chr3	MSU_osa1r7	CDS	6897911	6898009	.	+	.	ID=OsSRO1c:cds_4;Parent=OsSRO1c
Chr3	MSU_osa1r7	three_prime_UTR	6898010	6898428	.	+	.	ID=OsSRO1c:utr_2;Parent=OsSRO1c
Chr6	MSU_osa1r7	mRNA	7698453	7703820	.	+	.	ID=OsSRO1d;Name=OsSRO1d;Parent=LOC_Os06g13860
Chr6	MSU_osa1r7	five_prime_UTR	7698453	7698587	.	+	.	ID=OsSRO1d:utr_1;Parent=OsSRO1d
Chr6	MSU_osa1r7	five_prime_UTR	7699193	7699198	.	+	.	ID=OsSRO1d:utr_2;Parent=OsSRO1d
Chr6	MSU_osa1r7	CDS	7699199	7700160	.	+	.	ID=OsSRO1d:cds_1;Parent=OsSRO1d
Chr6	MSU_osa1r7	CDS	7700264	7700499	.	+	.	ID=OsSRO1d:cds_2;Parent=OsSRO1d
Chr6	MSU_osa1r7	CDS	7700605	7700684	.	+	.	ID=OsSRO1d:cds_3;Parent=OsSRO1d
Chr6	MSU_osa1r7	CDS	7702178	7703075	.	+	.	ID=OsSRO1d:cds_4;Parent=OsSRO1d
Chr6	MSU_osa1r7	CDS	7703166	7703293	.	+	.	ID=OsSRO1d:cds_5;Parent=OsSRO1d
Chr6	MSU_osa1r7	three_prime_UTR	7703294	7703328	.	+	.	ID=OsSRO1d:utr_3;Parent=OsSRO1d
Chr6	MSU_osa1r7	three_prime_UTR	7703424	7703820	.	+	.	ID=OsSRO1d:utr_4;Parent=OsSRO1d
Chr4	MSU_osa1r7	mRNA	34314086	34320150	.	-	.	ID=OsSRO1e;Name=OsSRO1e;Parent=LOC_Os04g57640
Chr4	MSU_osa1r7	five_prime_UTR	34319810	34320150	.	-	.	ID=OsSRO1e:utr_3;Parent=OsSRO1e
Chr4	MSU_osa1r7	five_prime_UTR	34318887	34318901	.	-	.	ID=OsSRO1e:utr_2;Parent=OsSRO1e
Chr4	MSU_osa1r7	CDS	34317937	34318886	.	-	.	ID=OsSRO1e:cds_1;Parent=OsSRO1e
Chr4	MSU_osa1r7	CDS	34317614	34317855	.	-	.	ID=OsSRO1e:cds_2;Parent=OsSRO1e
Chr4	MSU_osa1r7	CDS	34317447	34317526	.	-	.	ID=OsSRO1e:cds_3;Parent=OsSRO1e
Chr4	MSU_osa1r7	CDS	34317130	34317258	.	-	.	ID=OsSRO1e:cds_4;Parent=OsSRO1e
Chr4	MSU_osa1r7	CDS	34316931	34317026	.	-	.	ID=OsSRO1e:cds_5;Parent=OsSRO1e
Chr4	MSU_osa1r7	CDS	34315185	34316382	.	-	.	ID=OsSRO1e:cds_6;Parent=OsSRO1e
Chr4	MSU_osa1r7	CDS	34314893	34315090	.	-	.	ID=OsSRO1e:cds_7;Parent=OsSRO1e
Chr4	MSU_osa1r7	CDS	34314658	34314800	.	-	.	ID=OsSRO1e:cds_8;Parent=OsSRO1e
Chr4	MSU_osa1r7	three_prime_UTR	34314086	34314657	.	-	.	ID=OsSRO1e:utr_1;Parent=OsSRO1e
chr2	phytozomev13	mRNA	8417622	8434527	.	+	.	ID=VvSRO1;Name=VIT_202s0012g01920.1;pacid=38046622;longest=0;Parent=VIT_202s0012g01920.v2.1
chr2	phytozomev13	CDS	8417622	8418709	.	+	0	ID=VvSRO1.CDS.1;Parent=VvSRO1;pacid=38046622
chr2	phytozomev13	CDS	8419710	8419957	.	+	1	ID=VvSRO1.CDS.2;Parent=VvSRO1;pacid=38046622
chr2	phytozomev13	CDS	8420461	8420567	.	+	2	ID=VvSRO1.CDS.3;Parent=VvSRO1;pacid=38046622
chr2	phytozomev13	CDS	8426038	8426223	.	+	0	ID=VvSRO1.CDS.4;Parent=VvSRO1;pacid=38046622
chr2	phytozomev13	CDS	8426321	8426416	.	+	0	ID=VvSRO1.CDS.5;Parent=VvSRO1;pacid=38046622
chr2	phytozomev13	CDS	8433736	8433790	.	+	0	ID=VvSRO1.CDS.6;Parent=VvSRO1;pacid=38046622
chr2	phytozomev13	CDS	8434478	8434527	.	+	2	ID=VvSRO1.CDS.7;Parent=VvSRO1;pacid=38046622
chr2	phytozomev13	mRNA	8468744	8483070	.	+	.	ID=VvSRO2;Name=VIT_202s0012g01930.1;pacid=38044892;longest=0;Parent=VIT_202s0012g01930.v2.1
chr2	phytozomev13	CDS	8468744	8469840	.	+	0	ID=VvSRO2.CDS.1;Parent=VvSRO2;pacid=38044892
chr2	phytozomev13	CDS	8470292	8470539	.	+	1	ID=VvSRO2.CDS.2;Parent=VvSRO2;pacid=38044892
chr2	phytozomev13	CDS	8470969	8471072	.	+	2	ID=VvSRO2.CDS.3;Parent=VvSRO2;pacid=38044892
chr2	phytozomev13	CDS	8472627	8472812	.	+	0	ID=VvSRO2.CDS.4;Parent=VvSRO2;pacid=38044892
chr2	phytozomev13	CDS	8472911	8473006	.	+	0	ID=VvSRO2.CDS.5;Parent=VvSRO2;pacid=38044892
chr2	phytozomev13	CDS	8483002	8483070	.	+	0	ID=VvSRO2.CDS.6;Parent=VvSRO2;pacid=38044892
chr1	phytozomev13	mRNA	8010396	8012111	.	+	.	ID=VvSRO3;Name=VIT_201s0127g00680.1;pacid=38028048;longest=1;Parent=VIT_201s0127g00680.v2.1
chr1	phytozomev13	CDS	8010396	8010871	.	+	0	ID=VvSRO3.CDS.1;Parent=VvSRO3;pacid=38028048
chr1	phytozomev13	CDS	8011405	8011643	.	+	1	ID=VvSRO3.CDS.2;Parent=VvSRO3;pacid=38028048
chr1	phytozomev13	CDS	8011761	8011897	.	+	2	ID=VvSRO3.CDS.3;Parent=VvSRO3;pacid=38028048
chr1	phytozomev13	CDS	8011986	8012111	.	+	0	ID=VvSRO3.CDS.4;Parent=VvSRO3;pacid=38028048
chr18	phytozomev13	mRNA	6793991	6795709	.	+	.	ID=VvSRO4;Name=VIT_218s0001g08290.10;pacid=38038798;longest=0;Parent=VIT_218s0001g08290.v2.1
chr18	phytozomev13	CDS	6793991	6794973	.	+	0	ID=VvSRO4.CDS.1;Parent=VvSRO4;pacid=38038798
chr18	phytozomev13	CDS	6795067	6795299	.	+	1	ID=VvSRO4.CDS.2;Parent=VvSRO4;pacid=38038798
chr18	phytozomev13	CDS	6795387	6795526	.	+	2	ID=VvSRO4.CDS.3;Parent=VvSRO4;pacid=38038798
chr18	phytozomev13	CDS	6795608	6795709	.	+	0	ID=VvSRO4.CDS.4;Parent=VvSRO4;pacid=38038798
chr17	phytozomev13	mRNA	9558818	9560880	.	+	.	ID=VvSRO5;Name=VIT_217s0000g08370.1;pacid=38030517;longest=0;Parent=VIT_217s0000g08370.v2.1
chr17	phytozomev13	CDS	9558818	9559263	.	+	0	ID=VvSRO5.CDS.1;Parent=VvSRO5;pacid=38030517
chr17	phytozomev13	CDS	9559407	9559648	.	+	1	ID=VvSRO5.CDS.2;Parent=VvSRO5;pacid=38030517
chr17	phytozomev13	CDS	9559751	9559887	.	+	2	ID=VvSRO5.CDS.3;Parent=VvSRO5;pacid=38030517
chr17	phytozomev13	CDS	9559995	9560090	.	+	0	ID=VvSRO5.CDS.4;Parent=VvSRO5;pacid=38030517
chr17	phytozomev13	CDS	9560854	9560880	.	+	0	ID=VvSRO5.CDS.5;Parent=VvSRO5;pacid=38030517
3	maker_ITAG	mRNA	65852413	65855041	.	-	.	ID=transcript:SolySRO1;Parent=gene:Solyc03g114360.3;biotype=protein_coding;transcript_id=SolySRO1
3	maker_ITAG	three_prime_UTR	65852413	65853455	.	-	.	Parent=transcript:SolySRO1
3	maker_ITAG	CDS	65853456	65853551	.	-	0	ID=CDS:SolySRO1;Parent=transcript:SolySRO1;protein_id=SolySRO1
3	maker_ITAG	CDS	65853753	65853848	.	-	0	ID=CDS:SolySRO1;Parent=transcript:SolySRO1;protein_id=SolySRO1
3	maker_ITAG	CDS	65853930	65854392	.	-	1	ID=CDS:SolySRO1;Parent=transcript:SolySRO1;protein_id=SolySRO1
3	maker_ITAG	CDS	65854485	65855041	.	-	0	ID=CDS:SolySRO1;Parent=transcript:SolySRO1;protein_id=SolySRO1
5	maker_ITAG	mRNA	227170	231239	.	-	.	ID=transcript:SolySRO2;Parent=gene:Solyc05g005280.3;biotype=protein_coding;transcript_id=SolySRO2
5	maker_ITAG	three_prime_UTR	227170	227384	.	-	.	Parent=transcript:SolySRO2
5	maker_ITAG	CDS	227385	227486	.	-	0	ID=CDS:SolySRO2;Parent=transcript:SolySRO2;protein_id=SolySRO2
5	maker_ITAG	CDS	227594	227727	.	-	2	ID=CDS:SolySRO2;Parent=transcript:SolySRO2;protein_id=SolySRO2
5	maker_ITAG	CDS	228424	228662	.	-	1	ID=CDS:SolySRO2;Parent=transcript:SolySRO2;protein_id=SolySRO2
5	maker_ITAG	CDS	229372	229728	.	-	1	ID=CDS:SolySRO2;Parent=transcript:SolySRO2;protein_id=SolySRO2
5	maker_ITAG	CDS	229807	229922	.	-	0	ID=CDS:SolySRO2;Parent=transcript:SolySRO2;protein_id=SolySRO2
5	maker_ITAG	five_prime_UTR	229923	231239	.	-	.	Parent=transcript:SolySRO2
5	maker_ITAG	mRNA	231573	234474	.	-	.	ID=transcript:SolySRO3;Parent=gene:Solyc05g005290.3;biotype=protein_coding;transcript_id=SolySRO3
5	maker_ITAG	three_prime_UTR	231573	232050	.	-	.	Parent=transcript:SolySRO3
5	maker_ITAG	three_prime_UTR	232207	232312	.	-	.	Parent=transcript:SolySRO3
5	maker_ITAG	three_prime_UTR	232411	232496	.	-	.	Parent=transcript:SolySRO3
5	maker_ITAG	CDS	232497	232547	.	-	0	ID=CDS:SolySRO3;Parent=transcript:SolySRO3;protein_id=SolySRO3
5	maker_ITAG	CDS	232775	232985	.	-	1	ID=CDS:SolySRO3;Parent=transcript:SolySRO3;protein_id=SolySRO3
5	maker_ITAG	CDS	233067	233423	.	-	1	ID=CDS:SolySRO3;Parent=transcript:SolySRO3;protein_id=SolySRO3
5	maker_ITAG	CDS	233522	233640	.	-	0	ID=CDS:SolySRO3;Parent=transcript:SolySRO3;protein_id=SolySRO3
5	maker_ITAG	five_prime_UTR	233641	234474	.	-	.	Parent=transcript:SolySRO3
6	maker_ITAG	mRNA	41729366	41735760	.	+	.	ID=transcript:SolySRO4;Parent=gene:Solyc06g066330.3;biotype=protein_coding;transcript_id=SolySRO4
6	maker_ITAG	five_prime_UTR	41729366	41729775	.	+	.	Parent=transcript:SolySRO4
6	maker_ITAG	five_prime_UTR	41730742	41731382	.	+	.	Parent=transcript:SolySRO4
6	maker_ITAG	CDS	41731383	41732482	.	+	0	ID=CDS:SolySRO4;Parent=transcript:SolySRO4;protein_id=SolySRO4
6	maker_ITAG	CDS	41732855	41733096	.	+	1	ID=CDS:SolySRO4;Parent=transcript:SolySRO4;protein_id=SolySRO4
6	maker_ITAG	CDS	41733902	41733975	.	+	2	ID=CDS:SolySRO4;Parent=transcript:SolySRO4;protein_id=SolySRO4
6	maker_ITAG	CDS	41734660	41734824	.	+	0	ID=CDS:SolySRO4;Parent=transcript:SolySRO4;protein_id=SolySRO4
6	maker_ITAG	CDS	41734935	41735030	.	+	0	ID=CDS:SolySRO4;Parent=transcript:SolySRO4;protein_id=SolySRO4
6	maker_ITAG	CDS	41735413	41735520	.	+	0	ID=CDS:SolySRO4;Parent=transcript:SolySRO4;protein_id=SolySRO4
6	maker_ITAG	three_prime_UTR	41735521	41735760	.	+	.	Parent=transcript:SolySRO4
8	maker_ITAG	mRNA	192488	202183	.	-	.	ID=transcript:SolySRO5;Parent=gene:Solyc08g005270.3;biotype=protein_coding;transcript_id=SolySRO5
8	maker_ITAG	three_prime_UTR	192488	192849	.	-	.	Parent=transcript:SolySRO5
8	maker_ITAG	CDS	192850	192915	.	-	0	ID=CDS:SolySRO5;Parent=transcript:SolySRO5;protein_id=SolySRO5
8	maker_ITAG	CDS	193324	193419	.	-	0	ID=CDS:SolySRO5;Parent=transcript:SolySRO5;protein_id=SolySRO5
8	maker_ITAG	CDS	193555	193716	.	-	0	ID=CDS:SolySRO5;Parent=transcript:SolySRO5;protein_id=SolySRO5
8	maker_ITAG	CDS	194701	194798	.	-	2	ID=CDS:SolySRO5;Parent=transcript:SolySRO5;protein_id=SolySRO5
8	maker_ITAG	CDS	195665	195906	.	-	1	ID=CDS:SolySRO5;Parent=transcript:SolySRO5;protein_id=SolySRO5
8	maker_ITAG	CDS	196880	198018	.	-	0	ID=CDS:SolySRO5;Parent=transcript:SolySRO5;protein_id=SolySRO5
8	maker_ITAG	five_prime_UTR	198019	198148	.	-	.	Parent=transcript:SolySRO5
8	maker_ITAG	five_prime_UTR	198410	198531	.	-	.	Parent=transcript:SolySRO5
8	maker_ITAG	five_prime_UTR	201706	202183	.	-	.	Parent=transcript:SolySRO5
8	maker_ITAG	mRNA	60547166	60558705	.	-	.	ID=transcript:SolySRO6;Parent=gene:Solyc08g076420.3;biotype=protein_coding;transcript_id=SolySRO6
8	maker_ITAG	three_prime_UTR	60547166	60549849	.	-	.	Parent=transcript:SolySRO6
8	maker_ITAG	CDS	60549850	60549906	.	-	0	ID=CDS:SolySRO6;Parent=transcript:SolySRO6;protein_id=SolySRO6
8	maker_ITAG	CDS	60551380	60551475	.	-	0	ID=CDS:SolySRO6;Parent=transcript:SolySRO6;protein_id=SolySRO6
8	maker_ITAG	CDS	60551561	60551740	.	-	0	ID=CDS:SolySRO6;Parent=transcript:SolySRO6;protein_id=SolySRO6
8	maker_ITAG	CDS	60552796	60552893	.	-	2	ID=CDS:SolySRO6;Parent=transcript:SolySRO6;protein_id=SolySRO6
8	maker_ITAG	CDS	60554071	60554312	.	-	1	ID=CDS:SolySRO6;Parent=transcript:SolySRO6;protein_id=SolySRO6
8	maker_ITAG	CDS	60554765	60555885	.	-	0	ID=CDS:SolySRO6;Parent=transcript:SolySRO6;protein_id=SolySRO6
8	maker_ITAG	five_prime_UTR	60555886	60556008	.	-	.	Parent=transcript:SolySRO6
8	maker_ITAG	five_prime_UTR	60556413	60556531	.	-	.	Parent=transcript:SolySRO6
8	maker_ITAG	five_prime_UTR	60557919	60558705	.	-	.	Parent=transcript:SolySRO6
1	imgag	mRNA	50849518	50854983	.	-	.	ID=transcript:KEH44337;Parent=gene:MtSRO1;biotype=protein_coding;transcript_id=KEH44337
1	imgag	three_prime_UTR	50849518	50849919	.	-	.	Parent=transcript:KEH44337
1	imgag	CDS	50849920	50849931	.	-	0	ID=CDS:KEH44337;Parent=transcript:KEH44337;protein_id=KEH44337
1	imgag	CDS	50850114	50850212	.	-	0	ID=CDS:KEH44337;Parent=transcript:KEH44337;protein_id=KEH44337
1	imgag	CDS	50850305	50850436	.	-	0	ID=CDS:KEH44337;Parent=transcript:KEH44337;protein_id=KEH44337
1	imgag	CDS	50851524	50851618	.	-	2	ID=CDS:KEH44337;Parent=transcript:KEH44337;protein_id=KEH44337
1	imgag	CDS	50851924	50852165	.	-	1	ID=CDS:KEH44337;Parent=transcript:KEH44337;protein_id=KEH44337
1	imgag	CDS	50852607	50853727	.	-	0	ID=CDS:KEH44337;Parent=transcript:KEH44337;protein_id=KEH44337
1	imgag	five_prime_UTR	50853728	50854983	.	-	.	Parent=transcript:KEH44337
1	imgag	mRNA	50849523	50855008	.	-	.	ID=transcript:KEH44339;Parent=gene:MtSRO1;biotype=protein_coding;transcript_id=KEH44339
1	imgag	three_prime_UTR	50849523	50849919	.	-	.	Parent=transcript:KEH44339
1	imgag	CDS	50849920	50849931	.	-	0	ID=CDS:KEH44339;Parent=transcript:KEH44339;protein_id=KEH44339
1	imgag	CDS	50850114	50850212	.	-	0	ID=CDS:KEH44339;Parent=transcript:KEH44339;protein_id=KEH44339
1	imgag	CDS	50850305	50850436	.	-	0	ID=CDS:KEH44339;Parent=transcript:KEH44339;protein_id=KEH44339
1	imgag	CDS	50851515	50851618	.	-	2	ID=CDS:KEH44339;Parent=transcript:KEH44339;protein_id=KEH44339
1	imgag	CDS	50851924	50852165	.	-	1	ID=CDS:KEH44339;Parent=transcript:KEH44339;protein_id=KEH44339
1	imgag	CDS	50852607	50853727	.	-	0	ID=CDS:KEH44339;Parent=transcript:KEH44339;protein_id=KEH44339
1	imgag	five_prime_UTR	50853728	50855008	.	-	.	Parent=transcript:KEH44339
1	imgag	mRNA	50850437	50854983	.	-	.	ID=transcript:KEH44338;Parent=gene:MtSRO1;biotype=protein_coding;transcript_id=KEH44338
1	imgag	three_prime_UTR	50850437	50851903	.	-	.	Parent=transcript:KEH44338
1	imgag	CDS	50851904	50852165	.	-	1	ID=CDS:KEH44338;Parent=transcript:KEH44338;protein_id=KEH44338
1	imgag	CDS	50852607	50853727	.	-	0	ID=CDS:KEH44338;Parent=transcript:KEH44338;protein_id=KEH44338
1	imgag	five_prime_UTR	50853728	50854983	.	-	.	Parent=transcript:KEH44338
5	imgag	mRNA	13829161	13836239	.	+	.	ID=transcript:AES96015;Parent=gene:MtSRO2;biotype=protein_coding;transcript_id=AES96015
5	imgag	five_prime_UTR	13829161	13831932	.	+	.	Parent=transcript:AES96015
5	imgag	CDS	13831933	13833032	.	+	0	ID=CDS:AES96015;Parent=transcript:AES96015;protein_id=AES96015
5	imgag	CDS	13833750	13833991	.	+	1	ID=CDS:AES96015;Parent=transcript:AES96015;protein_id=AES96015
5	imgag	CDS	13834347	13834450	.	+	2	ID=CDS:AES96015;Parent=transcript:AES96015;protein_id=AES96015
5	imgag	CDS	13835244	13835375	.	+	0	ID=CDS:AES96015;Parent=transcript:AES96015;protein_id=AES96015
5	imgag	CDS	13835468	13835566	.	+	0	ID=CDS:AES96015;Parent=transcript:AES96015;protein_id=AES96015
5	imgag	CDS	13835674	13835718	.	+	0	ID=CDS:AES96015;Parent=transcript:AES96015;protein_id=AES96015
5	imgag	three_prime_UTR	13835719	13836239	.	+	.	Parent=transcript:AES96015
5	imgag	mRNA	13829161	13836239	.	+	.	ID=transcript:KEH27736;Parent=gene:MtSRO2;biotype=protein_coding;transcript_id=KEH27736
5	imgag	five_prime_UTR	13829161	13831932	.	+	.	Parent=transcript:KEH27736
5	imgag	exon	13829161	13833032	.	+	.	Parent=transcript:KEH27736;Name=AES96015-1;constitutive=0;ensembl_end_phase=2;ensembl_phase=0;exon_id=AES96015-1;rank=1
5	imgag	CDS	13831933	13833032	.	+	0	ID=CDS:KEH27736;Parent=transcript:KEH27736;protein_id=KEH27736
5	imgag	exon	13833750	13833991	.	+	.	Parent=transcript:KEH27736;Name=KEH27735-2;constitutive=1;ensembl_end_phase=1;ensembl_phase=2;exon_id=KEH27735-2;rank=2
5	imgag	CDS	13833750	13833991	.	+	1	ID=CDS:KEH27736;Parent=transcript:KEH27736;protein_id=KEH27736
5	imgag	exon	13834347	13834450	.	+	.	Parent=transcript:KEH27736;Name=AES96015-3;constitutive=0;ensembl_end_phase=0;ensembl_phase=1;exon_id=AES96015-3;rank=3
5	imgag	CDS	13834347	13834450	.	+	2	ID=CDS:KEH27736;Parent=transcript:KEH27736;protein_id=KEH27736
5	imgag	CDS	13834631	13834633	.	+	0	ID=CDS:KEH27736;Parent=transcript:KEH27736;protein_id=KEH27736
5	imgag	exon	13834631	13836239	.	+	.	Parent=transcript:KEH27736;Name=KEH27736-4;constitutive=0;ensembl_end_phase=1;ensembl_phase=0;exon_id=KEH27736-4;rank=4
5	imgag	three_prime_UTR	13834634	13836239	.	+	.	Parent=transcript:KEH27736
5	imgag	mRNA	13831933	13834471	.	+	.	ID=transcript:KEH27735;Parent=gene:MtSRO2;biotype=protein_coding;transcript_id=KEH27735
5	imgag	CDS	13831933	13833032	.	+	0	ID=CDS:KEH27735;Parent=transcript:KEH27735;protein_id=KEH27735
5	imgag	CDS	13833750	13833991	.	+	1	ID=CDS:KEH27735;Parent=transcript:KEH27735;protein_id=KEH27735
5	imgag	CDS	13834347	13834471	.	+	2	ID=CDS:KEH27735;Parent=transcript:KEH27735;protein_id=KEH27735
7	imgag	mRNA	3127740	3130244	.	-	.	ID=transcript:AES77514;Parent=gene:MtSRO3;biotype=protein_coding;transcript_id=AES77514
7	imgag	CDS	3127740	3127787	.	-	0	ID=CDS:AES77514;Parent=transcript:AES77514;protein_id=AES77514
7	imgag	CDS	3127981	3128076	.	-	0	ID=CDS:AES77514;Parent=transcript:AES77514;protein_id=AES77514
7	imgag	CDS	3128155	3128298	.	-	0	ID=CDS:AES77514;Parent=transcript:AES77514;protein_id=AES77514
7	imgag	CDS	3128453	3128511	.	-	2	ID=CDS:AES77514;Parent=transcript:AES77514;protein_id=AES77514
7	imgag	CDS	3128800	3129041	.	-	1	ID=CDS:AES77514;Parent=transcript:AES77514;protein_id=AES77514
7	imgag	CDS	3129190	3130244	.	-	0	ID=CDS:AES77514;Parent=transcript:AES77514;protein_id=AES77514
5	imgag	mRNA	12413704	12416462	.	-	.	ID=transcript:MtSRO4;Parent=gene:MtSRO4;biotype=protein_coding;transcript_id=MtSRO4
5	imgag	CDS	12413704	12413754	.	-	0	ID=CDS:MtSRO4;Parent=transcript:MtSRO4;protein_id=MtSRO4
5	imgag	CDS	12413959	12414054	.	-	0	ID=CDS:MtSRO4;Parent=transcript:MtSRO4;protein_id=MtSRO4
5	imgag	CDS	12414133	12414334	.	-	1	ID=CDS:MtSRO4;Parent=transcript:MtSRO4;protein_id=MtSRO4
5	imgag	CDS	12415544	12415795	.	-	1	ID=CDS:MtSRO4;Parent=transcript:MtSRO4;protein_id=MtSRO4
5	imgag	CDS	12415969	12416462	.	-	0	ID=CDS:MtSRO4;Parent=transcript:MtSRO4;protein_id=MtSRO4
8	imgag	mRNA	36539541	36541903	.	-	.	ID=transcript:MtSRO5;Parent=gene:MtSRO5;biotype=protein_coding;transcript_id=MtSRO5
8	imgag	CDS	36539541	36539654	.	-	0	ID=CDS:MtSRO5;Parent=transcript:MtSRO5;protein_id=MtSRO5
8	imgag	CDS	36539789	36539919	.	-	2	ID=CDS:MtSRO5;Parent=transcript:MtSRO5;protein_id=MtSRO5
8	imgag	CDS	36540635	36540873	.	-	1	ID=CDS:MtSRO5;Parent=transcript:MtSRO5;protein_id=MtSRO5
8	imgag	CDS	36541515	36541903	.	-	0	ID=CDS:MtSRO5;Parent=transcript:MtSRO5;protein_id=MtSRO5
3	imgag	gene	35056982	35060567	.	+	.	ID=gene:MtSRO5;biotype=protein_coding;description=inactive poly [ADP-ribose] polymerase SRO4;gene_id=MtSRO5;logic_name=imgag
3	imgag	mRNA	35056982	35060567	.	+	.	ID=transcript:MtSRO5;Parent=gene:MtSRO5;biotype=protein_coding;transcript_id=MtSRO5
3	imgag	five_prime_UTR	35056982	35057260	.	+	.	Parent=transcript:MtSRO5
3	imgag	CDS	35057261	35057730	.	+	0	ID=CDS:MtSRO5;Parent=transcript:MtSRO5;protein_id=MtSRO5
3	imgag	CDS	35058672	35058910	.	+	1	ID=CDS:MtSRO5;Parent=transcript:MtSRO5;protein_id=MtSRO5
3	imgag	CDS	35059015	35059145	.	+	2	ID=CDS:MtSRO5;Parent=transcript:MtSRO5;protein_id=MtSRO5
3	imgag	CDS	35059253	35059348	.	+	0	ID=CDS:MtSRO5;Parent=transcript:MtSRO5;protein_id=MtSRO5
3	imgag	CDS	35060194	35060241	.	+	0	ID=CDS:MtSRO5;Parent=transcript:MtSRO5;protein_id=MtSRO5
3	imgag	three_prime_UTR	35060242	35060567	.	+	.	Parent=transcript:MtSRO5
3	imgag	mRNA	35056982	35060567	.	+	.	ID=transcript:MtSRO6;Parent=gene:MtSRO6;biotype=protein_coding;transcript_id=MtSRO6
3	imgag	five_prime_UTR	35056982	35057260	.	+	.	Parent=transcript:MtSRO6
3	imgag	CDS	35057261	35057730	.	+	0	ID=CDS:MtSRO6;Parent=transcript:MtSRO6;protein_id=MtSRO6
3	imgag	CDS	35058672	35058910	.	+	1	ID=CDS:MtSRO6;Parent=transcript:MtSRO6;protein_id=MtSRO6
3	imgag	CDS	35059015	35059145	.	+	2	ID=CDS:MtSRO6;Parent=transcript:MtSRO6;protein_id=MtSRO6
3	imgag	CDS	35059253	35059348	.	+	0	ID=CDS:MtSRO6;Parent=transcript:MtSRO6;protein_id=MtSRO6
3	imgag	CDS	35060194	35060241	.	+	0	ID=CDS:MtSRO6;Parent=transcript:MtSRO6;protein_id=MtSRO6
3	imgag	three_prime_UTR	35060242	35060567	.	+	.	Parent=transcript:MtSRO6
4	imgag	mRNA	43896289	43900298	.	+	.	ID=transcript:MtSRO7;Parent=gene:MtSRO7;biotype=protein_coding;transcript_id=MtSRO7
4	imgag	five_prime_UTR	43896289	43896766	.	+	.	Parent=transcript:MtSRO7
4	imgag	CDS	43896767	43897197	.	+	0	ID=CDS:MtSRO7;Parent=transcript:MtSRO7;protein_id=MtSRO7
4	imgag	CDS	43897357	43897595	.	+	1	ID=CDS:MtSRO7;Parent=transcript:MtSRO7;protein_id=MtSRO7
4	imgag	CDS	43897686	43897828	.	+	2	ID=CDS:MtSRO7;Parent=transcript:MtSRO7;protein_id=MtSRO7
4	imgag	CDS	43897921	43898016	.	+	0	ID=CDS:MtSRO7;Parent=transcript:MtSRO7;protein_id=MtSRO7
4	imgag	CDS	43899777	43899845	.	+	0	ID=CDS:MtSRO7;Parent=transcript:MtSRO7;protein_id=MtSRO7
4	imgag	three_prime_UTR	43899846	43900298	.	+	.	Parent=transcript:MtSRO7
4	imgag	mRNA	43896318	43900298	.	+	.	ID=transcript:MtSRO7;Parent=gene:MtSRO7;biotype=protein_coding;transcript_id=MtSRO7
4	imgag	five_prime_UTR	43896318	43896766	.	+	.	Parent=transcript:MtSRO7
4	imgag	CDS	43896767	43897197	.	+	0	ID=CDS:MtSRO7;Parent=transcript:MtSRO7;protein_id=MtSRO7
4	imgag	CDS	43897357	43897595	.	+	1	ID=CDS:MtSRO7;Parent=transcript:MtSRO7;protein_id=MtSRO7
4	imgag	CDS	43897686	43897828	.	+	2	ID=CDS:MtSRO7;Parent=transcript:MtSRO7;protein_id=MtSRO7
4	imgag	CDS	43897921	43898040	.	+	0	ID=CDS:MtSRO7;Parent=transcript:MtSRO7;protein_id=MtSRO7
4	imgag	three_prime_UTR	43898041	43900298	.	+	.	Parent=transcript:MtSRO7
8	ena	mRNA	9465280	9467189	.	-	.	ID=transcript:GmSRO1;Parent=gene:GmSRO1;biotype=protein_coding;transcript_id=GmSRO1
8	ena	three_prime_UTR	9465280	9465659	.	-	.	Parent=transcript:GmSRO1
8	ena	CDS	9465660	9465749	.	-	0	ID=CDS:GmSRO1;Parent=transcript:GmSRO1;protein_id=GmSRO1
8	ena	CDS	9465848	9465978	.	-	2	ID=CDS:GmSRO1;Parent=transcript:GmSRO1;protein_id=GmSRO1
8	ena	CDS	9466226	9466467	.	-	1	ID=CDS:GmSRO1;Parent=transcript:GmSRO1;protein_id=GmSRO1
8	ena	CDS	9466740	9467131	.	-	0	ID=CDS:GmSRO1;Parent=transcript:GmSRO1;protein_id=GmSRO1
8	ena	five_prime_UTR	9467132	9467189	.	-	.	Parent=transcript:GmSRO1
4	ena	mRNA	45043047	45045971	.	+	.	ID=transcript:GmSRO2;Parent=gene:GmSRO2;biotype=protein_coding;transcript_id=GmSRO2
4	ena	five_prime_UTR	45043047	45043243	.	+	.	Parent=transcript:GmSRO2
4	ena	CDS	45043244	45043701	.	+	0	ID=CDS:GmSRO2;Parent=transcript:GmSRO2;protein_id=GmSRO2
4	ena	CDS	45043977	45044215	.	+	1	ID=CDS:GmSRO2;Parent=transcript:GmSRO2;protein_id=GmSRO2
4	ena	CDS	45044458	45044594	.	+	2	ID=CDS:GmSRO2;Parent=transcript:GmSRO2;protein_id=GmSRO2
4	ena	CDS	45044680	45044778	.	+	0	ID=CDS:GmSRO2;Parent=transcript:GmSRO2;protein_id=GmSRO2
4	ena	CDS	45045549	45045608	.	+	0	ID=CDS:GmSRO2;Parent=transcript:GmSRO2;protein_id=GmSRO2
4	ena	three_prime_UTR	45045609	45045971	.	+	.	Parent=transcript:GmSRO2
4	ena	mRNA	45043047	45045971	.	+	.	ID=transcript:GmSRO3;Parent=gene:GmSRO3;biotype=protein_coding;transcript_id=GmSRO3
4	ena	five_prime_UTR	45043047	45043243	.	+	.	Parent=transcript:GmSRO3
4	ena	CDS	45043244	45043701	.	+	0	ID=CDS:GmSRO3;Parent=transcript:GmSRO3;protein_id=GmSRO3
4	ena	CDS	45043977	45044215	.	+	1	ID=CDS:GmSRO3;Parent=transcript:GmSRO3;protein_id=GmSRO3
4	ena	CDS	45044458	45044594	.	+	2	ID=CDS:GmSRO3;Parent=transcript:GmSRO3;protein_id=GmSRO3
4	ena	CDS	45044680	45044778	.	+	0	ID=CDS:GmSRO3;Parent=transcript:GmSRO3;protein_id=GmSRO3
4	ena	CDS	45045549	45045608	.	+	0	ID=CDS:GmSRO3;Parent=transcript:GmSRO3;protein_id=GmSRO3
4	ena	three_prime_UTR	45045609	45045971	.	+	.	Parent=transcript:GmSRO3
17	ena	mRNA	6954450	6957797	.	+	.	ID=transcript:GmSRO4;Parent=gene:GmSRO4;biotype=protein_coding;transcript_id=GmSRO4
17	ena	five_prime_UTR	6954450	6954713	.	+	.	Parent=transcript:GmSRO4
17	ena	CDS	6954714	6955138	.	+	0	ID=CDS:GmSRO4;Parent=transcript:GmSRO4;protein_id=GmSRO4
17	ena	CDS	6955234	6955475	.	+	1	ID=CDS:GmSRO4;Parent=transcript:GmSRO4;protein_id=GmSRO4
17	ena	CDS	6955588	6955721	.	+	2	ID=CDS:GmSRO4;Parent=transcript:GmSRO4;protein_id=GmSRO4
17	ena	CDS	6955814	6955909	.	+	0	ID=CDS:GmSRO4;Parent=transcript:GmSRO4;protein_id=GmSRO4
17	ena	CDS	6957372	6957485	.	+	0	ID=CDS:GmSRO4;Parent=transcript:GmSRO4;protein_id=GmSRO4
17	ena	three_prime_UTR	6957486	6957797	.	+	.	Parent=transcript:GmSRO4
17	ena	mRNA	6954450	6958740	.	+	.	ID=transcript:GmSRO4;Parent=gene:GmSRO4;biotype=protein_coding;transcript_id=GmSRO4
17	ena	five_prime_UTR	6954450	6954713	.	+	.	Parent=transcript:GmSRO4
17	ena	CDS	6954714	6955138	.	+	0	ID=CDS:GmSRO4;Parent=transcript:GmSRO4;protein_id=GmSRO4
17	ena	CDS	6955234	6955475	.	+	1	ID=CDS:GmSRO4;Parent=transcript:GmSRO4;protein_id=GmSRO4
17	ena	CDS	6955588	6955721	.	+	2	ID=CDS:GmSRO4;Parent=transcript:GmSRO4;protein_id=GmSRO4
17	ena	CDS	6955814	6955909	.	+	0	ID=CDS:GmSRO4;Parent=transcript:GmSRO4;protein_id=GmSRO4
17	ena	CDS	6957372	6957439	.	+	0	ID=CDS:GmSRO4;Parent=transcript:GmSRO4;protein_id=GmSRO4
17	ena	CDS	6958338	6958359	.	+	1	ID=CDS:GmSRO4;Parent=transcript:GmSRO4;protein_id=GmSRO4
17	ena	three_prime_UTR	6958360	6958740	.	+	.	Parent=transcript:GmSRO4
17	ena	mRNA	6954714	6958070	.	+	.	ID=transcript:GmSRO4;Parent=gene:GmSRO4;biotype=protein_coding;transcript_id=GmSRO4
17	ena	CDS	6954714	6955138	.	+	0	ID=CDS:GmSRO4;Parent=transcript:GmSRO4;protein_id=GmSRO4
17	ena	CDS	6955234	6955475	.	+	1	ID=CDS:GmSRO4;Parent=transcript:GmSRO4;protein_id=GmSRO4
17	ena	CDS	6955588	6955721	.	+	2	ID=CDS:GmSRO4;Parent=transcript:GmSRO4;protein_id=GmSRO4
17	ena	CDS	6955814	6955909	.	+	0	ID=CDS:GmSRO4;Parent=transcript:GmSRO4;protein_id=GmSRO4
17	ena	CDS	6957372	6957439	.	+	0	ID=CDS:GmSRO4;Parent=transcript:GmSRO4;protein_id=GmSRO4
17	ena	CDS	6958067	6958070	.	+	1	ID=CDS:GmSRO4;Parent=transcript:GmSRO4;protein_id=GmSRO4
9	ena	mRNA	43118477	43124499	.	+	.	ID=transcript:GmSRO5;Parent=gene:GmSRO5;biotype=protein_coding;transcript_id=GmSRO5
9	ena	five_prime_UTR	43118477	43120797	.	+	.	Parent=transcript:GmSRO5
9	ena	CDS	43120798	43121918	.	+	0	ID=CDS:GmSRO5;Parent=transcript:GmSRO5;protein_id=GmSRO5
9	ena	CDS	43122345	43122586	.	+	1	ID=CDS:GmSRO5;Parent=transcript:GmSRO5;protein_id=GmSRO5
9	ena	CDS	43122941	43123041	.	+	2	ID=CDS:GmSRO5;Parent=transcript:GmSRO5;protein_id=GmSRO5
9	ena	CDS	43123554	43123697	.	+	0	ID=CDS:GmSRO5;Parent=transcript:GmSRO5;protein_id=GmSRO5
9	ena	CDS	43123783	43123878	.	+	0	ID=CDS:GmSRO5;Parent=transcript:GmSRO5;protein_id=GmSRO5
9	ena	CDS	43124055	43124102	.	+	0	ID=CDS:GmSRO5;Parent=transcript:GmSRO5;protein_id=GmSRO5
9	ena	three_prime_UTR	43124103	43124499	.	+	.	Parent=transcript:GmSRO5
IX	ena	mRNA	35493342	35496222	.	+	.	ID=transcript:SiSRO1;Parent=gene:SiSRO1;biotype=protein_coding;transcript_id=SiSRO1
IX	ena	CDS	35493342	35494453	.	+	0	ID=CDS:SiSRO1;Parent=transcript:SiSRO1;protein_id=SiSRO1
IX	ena	CDS	35494817	35495058	.	+	1	ID=CDS:SiSRO1;Parent=transcript:SiSRO1;protein_id=SiSRO1
IX	ena	CDS	35495159	35495244	.	+	2	ID=CDS:SiSRO1;Parent=transcript:SiSRO1;protein_id=SiSRO1
IX	ena	CDS	35495539	35495721	.	+	0	ID=CDS:SiSRO1;Parent=transcript:SiSRO1;protein_id=SiSRO1
IX	ena	CDS	35495806	35495901	.	+	0	ID=CDS:SiSRO1;Parent=transcript:SiSRO1;protein_id=SiSRO1
IX	ena	CDS	35496157	35496222	.	+	0	ID=CDS:SiSRO1;Parent=transcript:SiSRO1;protein_id=SiSRO1
I	ena	mRNA	3942405	3947089	.	-	.	ID=transcript:SiSRO2;Parent=gene:SiSRO2;biotype=protein_coding;transcript_id=SiSRO2
I	ena	three_prime_UTR	3942405	3942689	.	-	.	Parent=transcript:SiSRO2
I	ena	CDS	3942690	3942838	.	-	2	ID=CDS:SiSRO2;Parent=transcript:SiSRO2;protein_id=SiSRO2
I	ena	CDS	3942935	3943336	.	-	2	ID=CDS:SiSRO2;Parent=transcript:SiSRO2;protein_id=SiSRO2
I	ena	CDS	3943405	3943971	.	-	2	ID=CDS:SiSRO2;Parent=transcript:SiSRO2;protein_id=SiSRO2
I	ena	CDS	3944086	3944170	.	-	0	ID=CDS:SiSRO2;Parent=transcript:SiSRO2;protein_id=SiSRO2
I	ena	CDS	3944794	3944889	.	-	0	ID=CDS:SiSRO2;Parent=transcript:SiSRO2;protein_id=SiSRO2
I	ena	CDS	3944984	3945112	.	-	0	ID=CDS:SiSRO2;Parent=transcript:SiSRO2;protein_id=SiSRO2
I	ena	CDS	3945323	3945402	.	-	2	ID=CDS:SiSRO2;Parent=transcript:SiSRO2;protein_id=SiSRO2
I	ena	CDS	3945489	3945730	.	-	1	ID=CDS:SiSRO2;Parent=transcript:SiSRO2;protein_id=SiSRO2
I	ena	CDS	3945819	3946771	.	-	0	ID=CDS:SiSRO2;Parent=transcript:SiSRO2;protein_id=SiSRO2
I	ena	five_prime_UTR	3946772	3947089	.	-	.	Parent=transcript:SiSRO2
IX	ena	gene	52155967	52159679	.	+	.	ID=gene:SiSRO3;biotype=protein_coding;description=hypothetical protein;gene_id=SiSRO3;logic_name=ena
IX	ena	mRNA	52155967	52159679	.	+	.	ID=transcript:SiSRO3;Parent=gene:SiSRO3;biotype=protein_coding;transcript_id=SiSRO3
IX	ena	CDS	52155967	52155994	.	+	0	ID=CDS:SiSRO3;Parent=transcript:SiSRO3;protein_id=SiSRO3
IX	ena	CDS	52156507	52157659	.	+	2	ID=CDS:SiSRO3;Parent=transcript:SiSRO3;protein_id=SiSRO3
IX	ena	CDS	52158353	52158600	.	+	1	ID=CDS:SiSRO3;Parent=transcript:SiSRO3;protein_id=SiSRO3
IX	ena	CDS	52158684	52158817	.	+	2	ID=CDS:SiSRO3;Parent=transcript:SiSRO3;protein_id=SiSRO3
IX	ena	CDS	52159222	52159320	.	+	0	ID=CDS:SiSRO3;Parent=transcript:SiSRO3;protein_id=SiSRO3
IX	ena	three_prime_UTR	52159321	52159679	.	+	.	Parent=transcript:SiSRO3
IX	ena	mRNA	331955	337423	.	+	.	ID=transcript:SiSRO4;Parent=gene:SiSRO4;biotype=protein_coding;transcript_id=SiSRO4
IX	ena	five_prime_UTR	331955	333800	.	+	.	Parent=transcript:SiSRO4
IX	ena	CDS	333801	334873	.	+	0	ID=CDS:SiSRO4;Parent=transcript:SiSRO4;protein_id=SiSRO4
IX	ena	CDS	335075	335316	.	+	1	ID=CDS:SiSRO4;Parent=transcript:SiSRO4;protein_id=SiSRO4
IX	ena	CDS	335410	335486	.	+	2	ID=CDS:SiSRO4;Parent=transcript:SiSRO4;protein_id=SiSRO4
IX	ena	CDS	336242	336424	.	+	0	ID=CDS:SiSRO4;Parent=transcript:SiSRO4;protein_id=SiSRO4
IX	ena	CDS	336527	336622	.	+	0	ID=CDS:SiSRO4;Parent=transcript:SiSRO4;protein_id=SiSRO4
IX	ena	CDS	336883	336936	.	+	0	ID=CDS:SiSRO4;Parent=transcript:SiSRO4;protein_id=SiSRO4
IX	ena	three_prime_UTR	336937	337423	.	+	.	Parent=transcript:SiSRO4
IX	ena	mRNA	331955	337423	.	+	.	ID=transcript:SiSRO4;Parent=gene:SiSRO4;biotype=protein_coding;transcript_id=SiSRO4
IX	ena	five_prime_UTR	331955	333800	.	+	.	Parent=transcript:SiSRO4
IX	ena	CDS	333801	334873	.	+	0	ID=CDS:SiSRO4;Parent=transcript:SiSRO4;protein_id=SiSRO4
IX	ena	CDS	335075	335316	.	+	1	ID=CDS:SiSRO4;Parent=transcript:SiSRO4;protein_id=SiSRO4
IX	ena	CDS	335410	335486	.	+	2	ID=CDS:SiSRO4;Parent=transcript:SiSRO4;protein_id=SiSRO4
IX	ena	CDS	336242	336424	.	+	0	ID=CDS:SiSRO4;Parent=transcript:SiSRO4;protein_id=SiSRO4
IX	ena	CDS	336527	336622	.	+	0	ID=CDS:SiSRO4;Parent=transcript:SiSRO4;protein_id=SiSRO4
IX	ena	CDS	336883	336936	.	+	0	ID=CDS:SiSRO4;Parent=transcript:SiSRO4;protein_id=SiSRO4
IX	ena	three_prime_UTR	336937	337423	.	+	.	Parent=transcript:SiSRO4
6	ena	mRNA	7152416	7160227	.	+	.	ID=transcript:CrSRO1;Parent=gene:CrSRO1;biotype=protein_coding;transcript_id=CrSRO1
6	ena	five_prime_UTR	7152416	7153050	.	+	.	Parent=transcript:CrSRO1
6	ena	CDS	7153051	7153269	.	+	0	ID=CDS:CrSRO1;Parent=transcript:CrSRO1;protein_id=CrSRO1
6	ena	CDS	7153590	7153718	.	+	0	ID=CDS:CrSRO1;Parent=transcript:CrSRO1;protein_id=CrSRO1
6	ena	CDS	7154051	7154095	.	+	0	ID=CDS:CrSRO1;Parent=transcript:CrSRO1;protein_id=CrSRO1
6	ena	CDS	7154229	7154305	.	+	0	ID=CDS:CrSRO1;Parent=transcript:CrSRO1;protein_id=CrSRO1
6	ena	CDS	7154660	7154762	.	+	1	ID=CDS:CrSRO1;Parent=transcript:CrSRO1;protein_id=CrSRO1
6	ena	CDS	7155031	7156590	.	+	0	ID=CDS:CrSRO1;Parent=transcript:CrSRO1;protein_id=CrSRO1
6	ena	CDS	7156713	7157016	.	+	0	ID=CDS:CrSRO1;Parent=transcript:CrSRO1;protein_id=CrSRO1
6	ena	CDS	7157256	7157425	.	+	2	ID=CDS:CrSRO1;Parent=transcript:CrSRO1;protein_id=CrSRO1
6	ena	CDS	7157592	7157690	.	+	0	ID=CDS:CrSRO1;Parent=transcript:CrSRO1;protein_id=CrSRO1
6	ena	CDS	7158020	7158220	.	+	0	ID=CDS:CrSRO1;Parent=transcript:CrSRO1;protein_id=CrSRO1
6	ena	CDS	7158409	7158497	.	+	0	ID=CDS:CrSRO1;Parent=transcript:CrSRO1;protein_id=CrSRO1
6	ena	CDS	7158847	7159029	.	+	1	ID=CDS:CrSRO1;Parent=transcript:CrSRO1;protein_id=CrSRO1
6	ena	CDS	7159282	7160047	.	+	1	ID=CDS:CrSRO1;Parent=transcript:CrSRO1;protein_id=CrSRO1
6	ena	three_prime_UTR	7160048	7160227	.	+	.	Parent=transcript:CrSRO1
6	ena	mRNA	7152416	7160356	.	+	.	ID=transcript:CrSRO1;Parent=gene:CrSRO1;biotype=protein_coding;transcript_id=CrSRO1
6	ena	five_prime_UTR	7152416	7153050	.	+	.	Parent=transcript:CrSRO1
6	ena	CDS	7153051	7153269	.	+	0	ID=CDS:CrSRO1;Parent=transcript:CrSRO1;protein_id=CrSRO1
6	ena	CDS	7153590	7153718	.	+	0	ID=CDS:CrSRO1;Parent=transcript:CrSRO1;protein_id=CrSRO1
6	ena	CDS	7154051	7154095	.	+	0	ID=CDS:CrSRO1;Parent=transcript:CrSRO1;protein_id=CrSRO1
6	ena	CDS	7154229	7154305	.	+	0	ID=CDS:CrSRO1;Parent=transcript:CrSRO1;protein_id=CrSRO1
6	ena	CDS	7154660	7154762	.	+	1	ID=CDS:CrSRO1;Parent=transcript:CrSRO1;protein_id=CrSRO1
6	ena	CDS	7155031	7156590	.	+	0	ID=CDS:CrSRO1;Parent=transcript:CrSRO1;protein_id=CrSRO1
6	ena	CDS	7156713	7157016	.	+	0	ID=CDS:CrSRO1;Parent=transcript:CrSRO1;protein_id=CrSRO1
6	ena	CDS	7157256	7157425	.	+	2	ID=CDS:CrSRO1;Parent=transcript:CrSRO1;protein_id=CrSRO1
6	ena	CDS	7157592	7157690	.	+	0	ID=CDS:CrSRO1;Parent=transcript:CrSRO1;protein_id=CrSRO1
6	ena	CDS	7158020	7158220	.	+	0	ID=CDS:CrSRO1;Parent=transcript:CrSRO1;protein_id=CrSRO1
6	ena	CDS	7158409	7158497	.	+	0	ID=CDS:CrSRO1;Parent=transcript:CrSRO1;protein_id=CrSRO1
6	ena	CDS	7158847	7159029	.	+	1	ID=CDS:CrSRO1;Parent=transcript:CrSRO1;protein_id=CrSRO1
6	ena	CDS	7159282	7160047	.	+	1	ID=CDS:CrSRO1;Parent=transcript:CrSRO1;protein_id=CrSRO1
6	ena	three_prime_UTR	7160048	7160356	.	+	.	Parent=transcript:CrSRO1
6	ena	mRNA	7152416	7160647	.	+	.	ID=transcript:CrSRO1;Parent=gene:CrSRO1;biotype=protein_coding;transcript_id=CrSRO1
6	ena	five_prime_UTR	7152416	7153050	.	+	.	Parent=transcript:CrSRO1
6	ena	CDS	7153051	7153269	.	+	0	ID=CDS:CrSRO1;Parent=transcript:CrSRO1;protein_id=CrSRO1
6	ena	CDS	7153590	7153718	.	+	0	ID=CDS:CrSRO1;Parent=transcript:CrSRO1;protein_id=CrSRO1
6	ena	CDS	7154051	7154095	.	+	0	ID=CDS:CrSRO1;Parent=transcript:CrSRO1;protein_id=CrSRO1
6	ena	CDS	7154229	7154305	.	+	0	ID=CDS:CrSRO1;Parent=transcript:CrSRO1;protein_id=CrSRO1
6	ena	CDS	7154660	7154762	.	+	1	ID=CDS:CrSRO1;Parent=transcript:CrSRO1;protein_id=CrSRO1
6	ena	CDS	7155031	7156590	.	+	0	ID=CDS:CrSRO1;Parent=transcript:CrSRO1;protein_id=CrSRO1
6	ena	CDS	7156713	7157016	.	+	0	ID=CDS:CrSRO1;Parent=transcript:CrSRO1;protein_id=CrSRO1
6	ena	CDS	7157256	7157425	.	+	2	ID=CDS:CrSRO1;Parent=transcript:CrSRO1;protein_id=CrSRO1
6	ena	CDS	7157592	7157690	.	+	0	ID=CDS:CrSRO1;Parent=transcript:CrSRO1;protein_id=CrSRO1
6	ena	CDS	7158020	7158220	.	+	0	ID=CDS:CrSRO1;Parent=transcript:CrSRO1;protein_id=CrSRO1
6	ena	CDS	7158409	7158497	.	+	0	ID=CDS:CrSRO1;Parent=transcript:CrSRO1;protein_id=CrSRO1
6	ena	CDS	7158847	7159029	.	+	1	ID=CDS:CrSRO1;Parent=transcript:CrSRO1;protein_id=CrSRO1
6	ena	CDS	7159282	7160047	.	+	1	ID=CDS:CrSRO1;Parent=transcript:CrSRO1;protein_id=CrSRO1
6	ena	three_prime_UTR	7160048	7160647	.	+	.	Parent=transcript:CrSRO1
17	ena	mRNA	5667731	5670819	.	+	.	ID=transcript:CrSRO2;Parent=gene:CrSRO2;biotype=protein_coding;transcript_id=CrSRO2
17	ena	five_prime_UTR	5667731	5667912	.	+	.	Parent=transcript:CrSRO2
17	ena	CDS	5667913	5668042	.	+	0	ID=CDS:CrSRO2;Parent=transcript:CrSRO2;protein_id=CrSRO2
17	ena	CDS	5668348	5668772	.	+	2	ID=CDS:CrSRO2;Parent=transcript:CrSRO2;protein_id=CrSRO2
17	ena	CDS	5669043	5669209	.	+	0	ID=CDS:CrSRO2;Parent=transcript:CrSRO2;protein_id=CrSRO2
17	ena	CDS	5669498	5669635	.	+	1	ID=CDS:CrSRO2;Parent=transcript:CrSRO2;protein_id=CrSRO2
17	ena	CDS	5669887	5670223	.	+	1	ID=CDS:CrSRO2;Parent=transcript:CrSRO2;protein_id=CrSRO2
17	ena	three_prime_UTR	5670224	5670819	.	+	.	Parent=transcript:CrSRO2
1	ena	gene	768229	774577	.	-	.	ID=gene:BdSRO1;biotype=protein_coding;description=hypothetical protein;gene_id=BdSRO1;logic_name=ena
1	ena	mRNA	768229	774577	.	-	.	ID=transcript:BdSRO1;Parent=gene:BdSRO1;biotype=protein_coding;transcript_id=BdSRO1
1	ena	three_prime_UTR	768229	768627	.	-	.	Parent=transcript:BdSRO1
1	ena	CDS	768628	768660	.	-	0	ID=CDS:BdSRO1;Parent=transcript:BdSRO1;protein_id=BdSRO1
1	ena	CDS	768944	769039	.	-	0	ID=CDS:BdSRO1;Parent=transcript:BdSRO1;protein_id=BdSRO1
1	ena	CDS	769134	769328	.	-	0	ID=CDS:BdSRO1;Parent=transcript:BdSRO1;protein_id=BdSRO1
1	ena	CDS	770056	770132	.	-	2	ID=CDS:BdSRO1;Parent=transcript:BdSRO1;protein_id=BdSRO1
1	ena	CDS	770227	770429	.	-	1	ID=CDS:BdSRO1;Parent=transcript:BdSRO1;protein_id=BdSRO1
1	ena	CDS	770672	771720	.	-	0	ID=CDS:BdSRO1;Parent=transcript:BdSRO1;protein_id=BdSRO1
1	ena	five_prime_UTR	771721	774577	.	-	.	Parent=transcript:BdSRO1
1	ena	mRNA	768229	774577	.	-	.	ID=transcript:BdSRO1;Parent=gene:BdSRO1;biotype=protein_coding;transcript_id=BdSRO1
1	ena	three_prime_UTR	768229	768627	.	-	.	Parent=transcript:BdSRO1
1	ena	CDS	768628	768660	.	-	0	ID=CDS:BdSRO1;Parent=transcript:BdSRO1;protein_id=BdSRO1
1	ena	CDS	768944	769039	.	-	0	ID=CDS:BdSRO1;Parent=transcript:BdSRO1;protein_id=BdSRO1
1	ena	CDS	769134	769328	.	-	0	ID=CDS:BdSRO1;Parent=transcript:BdSRO1;protein_id=BdSRO1
1	ena	CDS	770056	770132	.	-	2	ID=CDS:BdSRO1;Parent=transcript:BdSRO1;protein_id=BdSRO1
1	ena	CDS	770227	770468	.	-	1	ID=CDS:BdSRO1;Parent=transcript:BdSRO1;protein_id=BdSRO1
1	ena	CDS	770672	771237	.	-	0	ID=CDS:BdSRO1;Parent=transcript:BdSRO1;protein_id=BdSRO1
1	ena	five_prime_UTR	771238	774577	.	-	.	Parent=transcript:BdSRO1
1	ena	mRNA	768229	774577	.	-	.	ID=transcript:BdSRO1;Parent=gene:BdSRO1;biotype=protein_coding;transcript_id=BdSRO1
1	ena	three_prime_UTR	768229	768627	.	-	.	Parent=transcript:BdSRO1
1	ena	CDS	768628	768660	.	-	0	ID=CDS:BdSRO1;Parent=transcript:BdSRO1;protein_id=BdSRO1
1	ena	CDS	768944	769039	.	-	0	ID=CDS:BdSRO1;Parent=transcript:BdSRO1;protein_id=BdSRO1
1	ena	CDS	769134	769328	.	-	0	ID=CDS:BdSRO1;Parent=transcript:BdSRO1;protein_id=BdSRO1
1	ena	CDS	770056	770132	.	-	2	ID=CDS:BdSRO1;Parent=transcript:BdSRO1;protein_id=BdSRO1
1	ena	CDS	770227	770429	.	-	1	ID=CDS:BdSRO1;Parent=transcript:BdSRO1;protein_id=BdSRO1
1	ena	CDS	770672	771720	.	-	0	ID=CDS:BdSRO1;Parent=transcript:BdSRO1;protein_id=BdSRO1
1	ena	five_prime_UTR	771721	774577	.	-	.	Parent=transcript:BdSRO1
1	ena	mRNA	768628	771720	.	-	.	ID=transcript:BdSRO1;Parent=gene:BdSRO1;biotype=protein_coding;transcript_id=BdSRO1
1	ena	CDS	768628	768660	.	-	0	ID=CDS:BdSRO1;Parent=transcript:BdSRO1;protein_id=BdSRO1
1	ena	CDS	768944	769039	.	-	0	ID=CDS:BdSRO1;Parent=transcript:BdSRO1;protein_id=BdSRO1
1	ena	CDS	769134	769328	.	-	0	ID=CDS:BdSRO1;Parent=transcript:BdSRO1;protein_id=BdSRO1
1	ena	CDS	770056	770132	.	-	2	ID=CDS:BdSRO1;Parent=transcript:BdSRO1;protein_id=BdSRO1
1	ena	CDS	770227	770468	.	-	1	ID=CDS:BdSRO1;Parent=transcript:BdSRO1;protein_id=BdSRO1
1	ena	CDS	770672	771720	.	-	0	ID=CDS:BdSRO1;Parent=transcript:BdSRO1;protein_id=BdSRO1
1	ena	mRNA	768628	771720	.	-	.	ID=transcript:BdSRO1;Parent=gene:BdSRO1;biotype=protein_coding;transcript_id=BdSRO1
1	ena	CDS	768628	768660	.	-	0	ID=CDS:BdSRO1;Parent=transcript:BdSRO1;protein_id=BdSRO1
1	ena	CDS	768944	769039	.	-	0	ID=CDS:BdSRO1;Parent=transcript:BdSRO1;protein_id=BdSRO1
1	ena	CDS	769134	769328	.	-	0	ID=CDS:BdSRO1;Parent=transcript:BdSRO1;protein_id=BdSRO1
1	ena	CDS	770056	770132	.	-	2	ID=CDS:BdSRO1;Parent=transcript:BdSRO1;protein_id=BdSRO1
1	ena	CDS	770227	770468	.	-	1	ID=CDS:BdSRO1;Parent=transcript:BdSRO1;protein_id=BdSRO1
1	ena	CDS	770672	771720	.	-	0	ID=CDS:BdSRO1;Parent=transcript:BdSRO1;protein_id=BdSRO1
1	ena	mRNA	768628	771720	.	-	.	ID=transcript:BdSRO1;Parent=gene:BdSRO1;biotype=protein_coding;transcript_id=BdSRO1
1	ena	CDS	768628	768660	.	-	0	ID=CDS:BdSRO1;Parent=transcript:BdSRO1;protein_id=BdSRO1
1	ena	CDS	768944	769039	.	-	0	ID=CDS:BdSRO1;Parent=transcript:BdSRO1;protein_id=BdSRO1
1	ena	CDS	769134	769328	.	-	0	ID=CDS:BdSRO1;Parent=transcript:BdSRO1;protein_id=BdSRO1
1	ena	CDS	770056	770132	.	-	2	ID=CDS:BdSRO1;Parent=transcript:BdSRO1;protein_id=BdSRO1
1	ena	CDS	770227	770468	.	-	1	ID=CDS:BdSRO1;Parent=transcript:BdSRO1;protein_id=BdSRO1
1	ena	CDS	770672	771720	.	-	0	ID=CDS:BdSRO1;Parent=transcript:BdSRO1;protein_id=BdSRO1
3	ena	mRNA	36424242	36429040	.	-	.	ID=transcript:BdSRO2;Parent=gene:BdSRO2;biotype=protein_coding;transcript_id=BdSRO2
3	ena	three_prime_UTR	36424242	36424928	.	-	.	Parent=transcript:BdSRO2
3	ena	CDS	36424929	36425003	.	-	0	ID=CDS:BdSRO2;Parent=transcript:BdSRO2;protein_id=BdSRO2
3	ena	CDS	36425168	36425263	.	-	0	ID=CDS:BdSRO2;Parent=transcript:BdSRO2;protein_id=BdSRO2
3	ena	CDS	36425368	36425550	.	-	0	ID=CDS:BdSRO2;Parent=transcript:BdSRO2;protein_id=BdSRO2
3	ena	CDS	36425844	36425929	.	-	2	ID=CDS:BdSRO2;Parent=transcript:BdSRO2;protein_id=BdSRO2
3	ena	CDS	36426036	36426277	.	-	1	ID=CDS:BdSRO2;Parent=transcript:BdSRO2;protein_id=BdSRO2
3	ena	CDS	36426521	36427632	.	-	0	ID=CDS:BdSRO2;Parent=transcript:BdSRO2;protein_id=BdSRO2
3	ena	five_prime_UTR	36427633	36429040	.	-	.	Parent=transcript:BdSRO2
3	ena	mRNA	36424592	36429023	.	-	.	ID=transcript:BdSRO2;Parent=gene:BdSRO2;biotype=protein_coding;transcript_id=BdSRO2
3	ena	three_prime_UTR	36424592	36425044	.	-	.	Parent=transcript:BdSRO2
3	ena	CDS	36425045	36425263	.	-	0	ID=CDS:BdSRO2;Parent=transcript:BdSRO2;protein_id=BdSRO2
3	ena	CDS	36425368	36425550	.	-	0	ID=CDS:BdSRO2;Parent=transcript:BdSRO2;protein_id=BdSRO2
3	ena	CDS	36425844	36425929	.	-	2	ID=CDS:BdSRO2;Parent=transcript:BdSRO2;protein_id=BdSRO2
3	ena	CDS	36426036	36426277	.	-	1	ID=CDS:BdSRO2;Parent=transcript:BdSRO2;protein_id=BdSRO2
3	ena	CDS	36426521	36427632	.	-	0	ID=CDS:BdSRO2;Parent=transcript:BdSRO2;protein_id=BdSRO2
3	ena	five_prime_UTR	36427633	36429023	.	-	.	Parent=transcript:BdSRO2
3	ena	mRNA	36424592	36429023	.	-	.	ID=transcript:BdSRO2;Parent=gene:BdSRO2;biotype=protein_coding;transcript_id=BdSRO2
3	ena	three_prime_UTR	36424592	36425724	.	-	.	Parent=transcript:BdSRO2
3	ena	CDS	36425725	36425772	.	-	0	ID=CDS:BdSRO2;Parent=transcript:BdSRO2;protein_id=BdSRO2
3	ena	CDS	36425844	36425929	.	-	2	ID=CDS:BdSRO2;Parent=transcript:BdSRO2;protein_id=BdSRO2
3	ena	CDS	36426036	36426277	.	-	1	ID=CDS:BdSRO2;Parent=transcript:BdSRO2;protein_id=BdSRO2
3	ena	CDS	36426521	36427632	.	-	0	ID=CDS:BdSRO2;Parent=transcript:BdSRO2;protein_id=BdSRO2
3	ena	five_prime_UTR	36427633	36429023	.	-	.	Parent=transcript:BdSRO2
1	ena	mRNA	62752907	62758296	.	-	.	ID=transcript:BdSRO3;Parent=gene:BdSRO3;biotype=protein_coding;transcript_id=BdSRO3
1	ena	three_prime_UTR	62752907	62753161	.	-	.	Parent=transcript:BdSRO3
1	ena	CDS	62753162	62753304	.	-	2	ID=CDS:BdSRO3;Parent=transcript:BdSRO3;protein_id=BdSRO3
1	ena	CDS	62753395	62753598	.	-	2	ID=CDS:BdSRO3;Parent=transcript:BdSRO3;protein_id=BdSRO3
1	ena	CDS	62753678	62753887	.	-	2	ID=CDS:BdSRO3;Parent=transcript:BdSRO3;protein_id=BdSRO3
1	ena	CDS	62753981	62754055	.	-	2	ID=CDS:BdSRO3;Parent=transcript:BdSRO3;protein_id=BdSRO3
1	ena	CDS	62754136	62754463	.	-	0	ID=CDS:BdSRO3;Parent=transcript:BdSRO3;protein_id=BdSRO3
1	ena	CDS	62756223	62756318	.	-	0	ID=CDS:BdSRO3;Parent=transcript:BdSRO3;protein_id=BdSRO3
1	ena	CDS	62756416	62756544	.	-	0	ID=CDS:BdSRO3;Parent=transcript:BdSRO3;protein_id=BdSRO3
1	ena	CDS	62756761	62756840	.	-	2	ID=CDS:BdSRO3;Parent=transcript:BdSRO3;protein_id=BdSRO3
1	ena	CDS	62756931	62757172	.	-	1	ID=CDS:BdSRO3;Parent=transcript:BdSRO3;protein_id=BdSRO3
1	ena	CDS	62757252	62758204	.	-	0	ID=CDS:BdSRO3;Parent=transcript:BdSRO3;protein_id=BdSRO3
1	ena	five_prime_UTR	62758205	62758296	.	-	.	Parent=transcript:BdSRO3
1	ena	mRNA	62752917	62758296	.	-	.	ID=transcript:BdSRO3;Parent=gene:BdSRO3;biotype=protein_coding;transcript_id=BdSRO3
1	ena	three_prime_UTR	62752917	62753161	.	-	.	Parent=transcript:BdSRO3
1	ena	CDS	62753162	62753304	.	-	2	ID=CDS:BdSRO3;Parent=transcript:BdSRO3;protein_id=BdSRO3
1	ena	CDS	62753395	62753598	.	-	2	ID=CDS:BdSRO3;Parent=transcript:BdSRO3;protein_id=BdSRO3
1	ena	CDS	62753678	62753887	.	-	2	ID=CDS:BdSRO3;Parent=transcript:BdSRO3;protein_id=BdSRO3
1	ena	CDS	62754136	62754463	.	-	0	ID=CDS:BdSRO3;Parent=transcript:BdSRO3;protein_id=BdSRO3
1	ena	CDS	62756223	62756318	.	-	0	ID=CDS:BdSRO3;Parent=transcript:BdSRO3;protein_id=BdSRO3
1	ena	CDS	62756416	62756544	.	-	0	ID=CDS:BdSRO3;Parent=transcript:BdSRO3;protein_id=BdSRO3
1	ena	CDS	62756761	62756840	.	-	2	ID=CDS:BdSRO3;Parent=transcript:BdSRO3;protein_id=BdSRO3
1	ena	CDS	62756931	62757172	.	-	1	ID=CDS:BdSRO3;Parent=transcript:BdSRO3;protein_id=BdSRO3
1	ena	CDS	62757252	62758204	.	-	0	ID=CDS:BdSRO3;Parent=transcript:BdSRO3;protein_id=BdSRO3
1	ena	five_prime_UTR	62758205	62758296	.	-	.	Parent=transcript:BdSRO3
1	ena	mRNA	62752917	62758296	.	-	.	ID=transcript:BdSRO3;Parent=gene:BdSRO3;biotype=protein_coding;transcript_id=BdSRO3
1	ena	three_prime_UTR	62752917	62753161	.	-	.	Parent=transcript:BdSRO3
1	ena	CDS	62753162	62753304	.	-	2	ID=CDS:BdSRO3;Parent=transcript:BdSRO3;protein_id=BdSRO3
1	ena	CDS	62753395	62753598	.	-	2	ID=CDS:BdSRO3;Parent=transcript:BdSRO3;protein_id=BdSRO3
1	ena	CDS	62753678	62753887	.	-	2	ID=CDS:BdSRO3;Parent=transcript:BdSRO3;protein_id=BdSRO3
1	ena	CDS	62753981	62754067	.	-	2	ID=CDS:BdSRO3;Parent=transcript:BdSRO3;protein_id=BdSRO3
1	ena	CDS	62754136	62754463	.	-	0	ID=CDS:BdSRO3;Parent=transcript:BdSRO3;protein_id=BdSRO3
1	ena	CDS	62756223	62756318	.	-	0	ID=CDS:BdSRO3;Parent=transcript:BdSRO3;protein_id=BdSRO3
1	ena	CDS	62756416	62756544	.	-	0	ID=CDS:BdSRO3;Parent=transcript:BdSRO3;protein_id=BdSRO3
1	ena	CDS	62756761	62756840	.	-	2	ID=CDS:BdSRO3;Parent=transcript:BdSRO3;protein_id=BdSRO3
1	ena	CDS	62756931	62757172	.	-	1	ID=CDS:BdSRO3;Parent=transcript:BdSRO3;protein_id=BdSRO3
1	ena	CDS	62757252	62758204	.	-	0	ID=CDS:BdSRO3;Parent=transcript:BdSRO3;protein_id=BdSRO3
1	ena	five_prime_UTR	62758205	62758296	.	-	.	Parent=transcript:BdSRO3
1	ena	mRNA	62753162	62758204	.	-	.	ID=transcript:BdSRO3;Parent=gene:BdSRO3;biotype=protein_coding;transcript_id=BdSRO3
1	ena	CDS	62753162	62753304	.	-	2	ID=CDS:BdSRO3;Parent=transcript:BdSRO3;protein_id=BdSRO3
1	ena	CDS	62753395	62753598	.	-	2	ID=CDS:BdSRO3;Parent=transcript:BdSRO3;protein_id=BdSRO3
1	ena	CDS	62753678	62753908	.	-	2	ID=CDS:BdSRO3;Parent=transcript:BdSRO3;protein_id=BdSRO3
1	ena	CDS	62753981	62754055	.	-	2	ID=CDS:BdSRO3;Parent=transcript:BdSRO3;protein_id=BdSRO3
1	ena	CDS	62754136	62754463	.	-	0	ID=CDS:BdSRO3;Parent=transcript:BdSRO3;protein_id=BdSRO3
1	ena	CDS	62756223	62756318	.	-	0	ID=CDS:BdSRO3;Parent=transcript:BdSRO3;protein_id=BdSRO3
1	ena	CDS	62756416	62756544	.	-	0	ID=CDS:BdSRO3;Parent=transcript:BdSRO3;protein_id=BdSRO3
1	ena	CDS	62756761	62756840	.	-	2	ID=CDS:BdSRO3;Parent=transcript:BdSRO3;protein_id=BdSRO3
1	ena	CDS	62756931	62757172	.	-	1	ID=CDS:BdSRO3;Parent=transcript:BdSRO3;protein_id=BdSRO3
1	ena	CDS	62757252	62758204	.	-	0	ID=CDS:BdSRO3;Parent=transcript:BdSRO3;protein_id=BdSRO3
1	ena	mRNA	62753162	62758204	.	-	.	ID=transcript:BdSRO3;Parent=gene:BdSRO3;biotype=protein_coding;transcript_id=BdSRO3
1	ena	CDS	62753162	62753304	.	-	2	ID=CDS:BdSRO3;Parent=transcript:BdSRO3;protein_id=BdSRO3
1	ena	CDS	62753395	62753598	.	-	2	ID=CDS:BdSRO3;Parent=transcript:BdSRO3;protein_id=BdSRO3
1	ena	CDS	62753678	62753908	.	-	2	ID=CDS:BdSRO3;Parent=transcript:BdSRO3;protein_id=BdSRO3
1	ena	CDS	62754136	62754463	.	-	0	ID=CDS:BdSRO3;Parent=transcript:BdSRO3;protein_id=BdSRO3
1	ena	CDS	62756223	62756318	.	-	0	ID=CDS:BdSRO3;Parent=transcript:BdSRO3;protein_id=BdSRO3
1	ena	CDS	62756416	62756544	.	-	0	ID=CDS:BdSRO3;Parent=transcript:BdSRO3;protein_id=BdSRO3
1	ena	CDS	62756761	62756840	.	-	2	ID=CDS:BdSRO3;Parent=transcript:BdSRO3;protein_id=BdSRO3
1	ena	CDS	62756931	62757172	.	-	1	ID=CDS:BdSRO3;Parent=transcript:BdSRO3;protein_id=BdSRO3
1	ena	CDS	62757252	62758204	.	-	0	ID=CDS:BdSRO3;Parent=transcript:BdSRO3;protein_id=BdSRO3
5	ena	gene	27155614	27164766	.	-	.	ID=gene:BdSRO4;biotype=protein_coding;description=hypothetical protein;gene_id=BdSRO4;logic_name=ena
5	ena	mRNA	27155614	27164766	.	-	.	ID=transcript:BdSRO4;Parent=gene:BdSRO4;biotype=protein_coding;transcript_id=BdSRO4
5	ena	three_prime_UTR	27155614	27159098	.	-	.	Parent=transcript:BdSRO4
5	ena	CDS	27159099	27159244	.	-	2	ID=CDS:BdSRO4;Parent=transcript:BdSRO4;protein_id=BdSRO4
5	ena	CDS	27159342	27159536	.	-	2	ID=CDS:BdSRO4;Parent=transcript:BdSRO4;protein_id=BdSRO4
5	ena	CDS	27159621	27160410	.	-	0	ID=CDS:BdSRO4;Parent=transcript:BdSRO4;protein_id=BdSRO4
5	ena	CDS	27160735	27160830	.	-	0	ID=CDS:BdSRO4;Parent=transcript:BdSRO4;protein_id=BdSRO4
5	ena	CDS	27160931	27161059	.	-	0	ID=CDS:BdSRO4;Parent=transcript:BdSRO4;protein_id=BdSRO4
5	ena	CDS	27161270	27161349	.	-	2	ID=CDS:BdSRO4;Parent=transcript:BdSRO4;protein_id=BdSRO4
5	ena	CDS	27161465	27161706	.	-	1	ID=CDS:BdSRO4;Parent=transcript:BdSRO4;protein_id=BdSRO4
5	ena	CDS	27161786	27162729	.	-	0	ID=CDS:BdSRO4;Parent=transcript:BdSRO4;protein_id=BdSRO4
5	ena	five_prime_UTR	27162730	27164766	.	-	.	Parent=transcript:BdSRO4
1	ena	mRNA	67837954	67840498	.	+	.	ID=transcript:BdSRO5;Parent=gene:BdSRO5;biotype=protein_coding;transcript_id=BdSRO5
1	ena	five_prime_UTR	67837954	67838208	.	+	.	Parent=transcript:BdSRO5
1	ena	CDS	67838209	67839038	.	+	0	ID=CDS:BdSRO5;Parent=transcript:BdSRO5;protein_id=BdSRO5
1	ena	CDS	67839460	67839707	.	+	1	ID=CDS:BdSRO5;Parent=transcript:BdSRO5;protein_id=BdSRO5
1	ena	CDS	67839797	67839939	.	+	2	ID=CDS:BdSRO5;Parent=transcript:BdSRO5;protein_id=BdSRO5
1	ena	CDS	67840059	67840157	.	+	0	ID=CDS:BdSRO5;Parent=transcript:BdSRO5;protein_id=BdSRO5
1	ena	three_prime_UTR	67840158	67840498	.	+	.	Parent=transcript:BdSRO5
NW_011550975.1	Gnomon	mRNA	372672	412502	.	-	.	ID=rna-EgSRO1;Parent=gene-EgSRO1;Dbxref=GeneID:EgSRO1,Genbank:EgSRO1;Name=EgSRO1;gbkey=mRNA;gene=EgSRO1;model_evidence=Supporting evidence includes similarity to: 1 Protein%2C and 100%25 coverage of the annotated genomic feature by RNAseq alignments%2C including 9 samples with support for all annotated introns;product=probable inactive poly [ADP-ribose] polymerase SRO1%2C transcript variant X2;tr…
NW_011550975.1	Gnomon	CDS	409981	410927	.	-	0	ID=cds-EgSRO1;Parent=rna-EgSRO1;Dbxref=GeneID:EgSRO1,Genbank:EgSRO1;Name=EgSRO1;gbkey=CDS;gene=EgSRO1;product=inactive poly [ADP-ribose] polymerase RCD1 isoform X1;protein_id=EgSRO1
NW_011550975.1	Gnomon	CDS	409517	409758	.	-	1	ID=cds-EgSRO1;Parent=rna-EgSRO1;Dbxref=GeneID:EgSRO1,Genbank:EgSRO1;Name=EgSRO1;gbkey=CDS;gene=EgSRO1;product=inactive poly [ADP-ribose] polymerase RCD1 isoform X1;protein_id=EgSRO1
NW_011550975.1	Gnomon	CDS	409341	409420	.	-	2	ID=cds-EgSRO1;Parent=rna-EgSRO1;Dbxref=GeneID:EgSRO1,Genbank:EgSRO1;Name=EgSRO1;gbkey=CDS;gene=EgSRO1;product=inactive poly [ADP-ribose] polymerase RCD1 isoform X1;protein_id=EgSRO1
NW_011550975.1	Gnomon	CDS	408969	409097	.	-	0	ID=cds-EgSRO1;Parent=rna-EgSRO1;Dbxref=GeneID:EgSRO1,Genbank:EgSRO1;Name=EgSRO1;gbkey=CDS;gene=EgSRO1;product=inactive poly [ADP-ribose] polymerase RCD1 isoform X1;protein_id=EgSRO1
NW_011550975.1	Gnomon	CDS	408772	408867	.	-	0	ID=cds-EgSRO1;Parent=rna-EgSRO1;Dbxref=GeneID:EgSRO1,Genbank:EgSRO1;Name=EgSRO1;gbkey=CDS;gene=EgSRO1;product=inactive poly [ADP-ribose] polymerase RCD1 isoform X1;protein_id=EgSRO1
NW_011550975.1	Gnomon	CDS	398899	399723	.	-	0	ID=cds-EgSRO1;Parent=rna-EgSRO1;Dbxref=GeneID:EgSRO1,Genbank:EgSRO1;Name=EgSRO1;gbkey=CDS;gene=EgSRO1;product=inactive poly [ADP-ribose] polymerase RCD1 isoform X1;protein_id=EgSRO1
NW_011550975.1	Gnomon	mRNA	415492	408322	.	-	.	ID=rna-EgSRO1;Parent=gene-EgSRO1;Dbxref=GeneID:EgSRO1,Genbank:EgSRO1;Name=EgSRO1;gbkey=mRNA;gene=EgSRO1;model_evidence=Supporting evidence includes similarity to: 1 Protein%2C and 100%25 coverage of the annotated genomic feature by RNAseq alignments%2C including 9 samples with support for all annotated introns;product=probable inactive poly [ADP-ribose] polymerase SRO1%2C transcript variant X2;tr…
NW_011550975.1	Gnomon	CDS	417273	408834	.	-	1.11e-16	ID=cds-EgSRO1;Parent=rna-EgSRO1;Dbxref=GeneID:EgSRO1,Genbank:EgSRO1;Name=EgSRO1;gbkey=CDS;gene=EgSRO1;product=inactive poly [ADP-ribose] polymerase RCD1 isoform X1;protein_id=EgSRO1
NW_011550975.1	Gnomon	CDS	417471	408891	.	-	-0.14286	ID=cds-EgSRO1;Parent=rna-EgSRO1;Dbxref=GeneID:EgSRO1,Genbank:EgSRO1;Name=EgSRO1;gbkey=CDS;gene=EgSRO1;product=inactive poly [ADP-ribose] polymerase RCD1 isoform X1;protein_id=EgSRO1
NW_011550975.1	Gnomon	CDS	417669	408948	.	-	-0.28571	ID=cds-EgSRO1;Parent=rna-EgSRO1;Dbxref=GeneID:EgSRO1,Genbank:EgSRO1;Name=EgSRO1;gbkey=CDS;gene=EgSRO1;product=inactive poly [ADP-ribose] polymerase RCD1 isoform X1;protein_id=EgSRO1
NW_011550975.1	Gnomon	CDS	417867	409005	.	-	-0.42857	ID=cds-EgSRO1;Parent=rna-EgSRO1;Dbxref=GeneID:EgSRO1,Genbank:EgSRO1;Name=EgSRO1;gbkey=CDS;gene=EgSRO1;product=inactive poly [ADP-ribose] polymerase RCD1 isoform X1;protein_id=EgSRO1
NW_011550975.1	Gnomon	CDS	418065	409062	.	-	-0.57143	ID=cds-EgSRO1;Parent=rna-EgSRO1;Dbxref=GeneID:EgSRO1,Genbank:EgSRO1;Name=EgSRO1;gbkey=CDS;gene=EgSRO1;product=inactive poly [ADP-ribose] polymerase RCD1 isoform X1;protein_id=EgSRO1
NW_011550975.1	Gnomon	CDS	418262	409118	.	-	-0.71429	ID=cds-EgSRO1;Parent=rna-EgSRO1;Dbxref=GeneID:EgSRO1,Genbank:EgSRO1;Name=EgSRO1;gbkey=CDS;gene=EgSRO1;product=inactive poly [ADP-ribose] polymerase RCD1 isoform X1;protein_id=EgSRO1
NC_026003.1	Gnomon	mRNA	25579288	25599054	.	-	.	ID=EgSRO2;Parent=EgSRO2;Dbxref=GeneID:EgSRO2,Genbank:EgSRO2;Name=EgSRO2;gbkey=mRNA;gene=EgSRO2;model_evidence=Supporting evidence includes similarity to: 7 ESTs%2C 6 Proteins%2C and 100%25 coverage of the annotated genomic feature by RNAseq alignments%2C including 47 samples with support for all annotated introns;product=inactive poly [ADP-ribose] polymerase RCD1%2C transcript variant X2;transcri…
NC_026003.1	Gnomon	CDS	25583735	25584852	.	-	0	ID=cds-EgSRO2;Parent=EgSRO2;Dbxref=GeneID:EgSRO2,Genbank:EgSRO2;Name=EgSRO2;gbkey=CDS;gene=EgSRO2;product=inactive poly [ADP-ribose] polymerase RCD1 isoform X1;protein_id=EgSRO2
NC_026003.1	Gnomon	CDS	25583282	25583523	.	-	1	ID=cds-EgSRO2;Parent=EgSRO2;Dbxref=GeneID:EgSRO2,Genbank:EgSRO2;Name=EgSRO2;gbkey=CDS;gene=EgSRO2;product=inactive poly [ADP-ribose] polymerase RCD1 isoform X1;protein_id=EgSRO2
NC_026003.1	Gnomon	CDS	25583112	25583188	.	-	2	ID=cds-EgSRO2;Parent=EgSRO2;Dbxref=GeneID:EgSRO2,Genbank:EgSRO2;Name=EgSRO2;gbkey=CDS;gene=EgSRO2;product=inactive poly [ADP-ribose] polymerase RCD1 isoform X1;protein_id=EgSRO2
NC_026003.1	Gnomon	CDS	25582531	25582716	.	-	0	ID=cds-EgSRO2;Parent=EgSRO2;Dbxref=GeneID:EgSRO2,Genbank:EgSRO2;Name=EgSRO2;gbkey=CDS;gene=EgSRO2;product=inactive poly [ADP-ribose] polymerase RCD1 isoform X1;protein_id=EgSRO2
NC_026003.1	Gnomon	CDS	25582352	25582447	.	-	0	ID=cds-EgSRO2;Parent=EgSRO2;Dbxref=GeneID:EgSRO2,Genbank:EgSRO2;Name=EgSRO2;gbkey=CDS;gene=EgSRO2;product=inactive poly [ADP-ribose] polymerase RCD1 isoform X1;protein_id=EgSRO2
NC_026003.1	Gnomon	CDS	25579614	25579679	.	-	0	ID=cds-EgSRO2;Parent=EgSRO2;Dbxref=GeneID:EgSRO2,Genbank:EgSRO2;Name=EgSRO2;gbkey=CDS;gene=EgSRO2;product=inactive poly [ADP-ribose] polymerase RCD1 isoform X1;protein_id=EgSRO2
NC_026003.1	Gnomon	mRNA	25579288	25598997	.	-	.	ID=EgSRO2;Parent=EgSRO2;Dbxref=GeneID:EgSRO2,Genbank:EgSRO2;Name=EgSRO2;gbkey=mRNA;gene=EgSRO2;model_evidence=Supporting evidence includes similarity to: 4 ESTs%2C 6 Proteins%2C and 100%25 coverage of the annotated genomic feature by RNAseq alignments%2C including 44 samples with support for all annotated introns;product=inactive poly [ADP-ribose] polymerase RCD1%2C transcript variant X1;transcri…
NC_026003.1	Gnomon	CDS	25583735	25584852	.	-	0	ID=EgSRO2;Parent=EgSRO2;Dbxref=GeneID:EgSRO2,Genbank:EgSRO2;Name=EgSRO2;gbkey=CDS;gene=EgSRO2;product=inactive poly [ADP-ribose] polymerase RCD1 isoform X1;protein_id=EgSRO2
NC_026003.1	Gnomon	CDS	25583282	25583523	.	-	1	ID=EgSRO2;Parent=EgSRO2;Dbxref=GeneID:EgSRO2,Genbank:EgSRO2;Name=EgSRO2;gbkey=CDS;gene=EgSRO2;product=inactive poly [ADP-ribose] polymerase RCD1 isoform X1;protein_id=EgSRO2
NC_026003.1	Gnomon	CDS	25583112	25583188	.	-	2	ID=EgSRO2;Parent=EgSRO2;Dbxref=GeneID:EgSRO2,Genbank:EgSRO2;Name=EgSRO2;gbkey=CDS;gene=EgSRO2;product=inactive poly [ADP-ribose] polymerase RCD1 isoform X1;protein_id=EgSRO2
NC_026003.1	Gnomon	CDS	25582531	25582716	.	-	0	ID=EgSRO2;Parent=EgSRO2;Dbxref=GeneID:EgSRO2,Genbank:EgSRO2;Name=EgSRO2;gbkey=CDS;gene=EgSRO2;product=inactive poly [ADP-ribose] polymerase RCD1 isoform X1;protein_id=EgSRO2
NC_026003.1	Gnomon	CDS	25582352	25582447	.	-	0	ID=EgSRO2;Parent=EgSRO2;Dbxref=GeneID:EgSRO2,Genbank:EgSRO2;Name=EgSRO2;gbkey=CDS;gene=EgSRO2;product=inactive poly [ADP-ribose] polymerase RCD1 isoform X1;protein_id=EgSRO2
NC_026003.1	Gnomon	CDS	25579614	25579679	.	-	0	ID=EgSRO2;Parent=EgSRO2;Dbxref=GeneID:EgSRO2,Genbank:EgSRO2;Name=EgSRO2;gbkey=CDS;gene=EgSRO2;product=inactive poly [ADP-ribose] polymerase RCD1 isoform X1;protein_id=EgSRO2
NC_026003.1	Gnomon	mRNA	25579288	25598984	.	-	.	ID=EgSRO2;Parent=EgSRO2;Dbxref=GeneID:EgSRO2,Genbank:EgSRO2;Name=EgSRO2;gbkey=mRNA;gene=EgSRO2;model_evidence=Supporting evidence includes similarity to: 4 ESTs%2C 6 Proteins%2C and 100%25 coverage of the annotated genomic feature by RNAseq alignments%2C including 31 samples with support for all annotated introns;product=inactive poly [ADP-ribose] polymerase RCD1%2C transcript variant X3;transcri…
NC_026003.1	Gnomon	CDS	25583735	25584852	.	-	0	ID=EgSRO2;Parent=EgSRO2;Dbxref=GeneID:EgSRO2,Genbank:EgSRO2;Name=EgSRO2;gbkey=CDS;gene=EgSRO2;product=inactive poly [ADP-ribose] polymerase RCD1 isoform X1;protein_id=EgSRO2
NC_026003.1	Gnomon	CDS	25583282	25583523	.	-	1	ID=EgSRO2;Parent=EgSRO2;Dbxref=GeneID:EgSRO2,Genbank:EgSRO2;Name=EgSRO2;gbkey=CDS;gene=EgSRO2;product=inactive poly [ADP-ribose] polymerase RCD1 isoform X1;protein_id=EgSRO2
NC_026003.1	Gnomon	CDS	25583112	25583188	.	-	2	ID=EgSRO2;Parent=EgSRO2;Dbxref=GeneID:EgSRO2,Genbank:EgSRO2;Name=EgSRO2;gbkey=CDS;gene=EgSRO2;product=inactive poly [ADP-ribose] polymerase RCD1 isoform X1;protein_id=EgSRO2
NC_026003.1	Gnomon	CDS	25582531	25582716	.	-	0	ID=EgSRO2;Parent=EgSRO2;Dbxref=GeneID:EgSRO2,Genbank:EgSRO2;Name=EgSRO2;gbkey=CDS;gene=EgSRO2;product=inactive poly [ADP-ribose] polymerase RCD1 isoform X1;protein_id=EgSRO2
NC_026003.1	Gnomon	CDS	25582352	25582447	.	-	0	ID=EgSRO2;Parent=EgSRO2;Dbxref=GeneID:EgSRO2,Genbank:EgSRO2;Name=EgSRO2;gbkey=CDS;gene=EgSRO2;product=inactive poly [ADP-ribose] polymerase RCD1 isoform X1;protein_id=EgSRO2
NC_026003.1	Gnomon	CDS	25579614	25579679	.	-	0	ID=EgSRO2;Parent=EgSRO2;Dbxref=GeneID:EgSRO2,Genbank:EgSRO2;Name=EgSRO2;gbkey=CDS;gene=EgSRO2;product=inactive poly [ADP-ribose] polymerase RCD1 isoform X1;protein_id=EgSRO2
NC_026003.1	Gnomon	mRNA	25579697	25598998	.	-	.	ID=EgSRO2;Parent=EgSRO2;Dbxref=GeneID:EgSRO2,Genbank:EgSRO2.1;Name=EgSRO2.1;gbkey=mRNA;gene=EgSRO2;model_evidence=Supporting evidence includes similarity to: 1 EST%2C 6 Proteins%2C and 100%25 coverage of the annotated genomic feature by RNAseq alignments%2C including 34 samples with support for all annotated introns;product=inactive poly [ADP-ribose] polymerase RCD1%2C transcript variant X4;trans…
NC_026003.1	Gnomon	CDS	25583735	25584852	.	-	0	ID=EgSRO2;Parent=EgSRO2;Dbxref=GeneID:EgSRO2,Genbank:EgSRO2;Name=EgSRO2;gbkey=CDS;gene=EgSRO2;product=inactive poly [ADP-ribose] polymerase RCD1 isoform X2;protein_id=EgSRO2
NC_026003.1	Gnomon	CDS	25583282	25583523	.	-	1	ID=EgSRO2;Parent=EgSRO2;Dbxref=GeneID:EgSRO2,Genbank:EgSRO2;Name=EgSRO2;gbkey=CDS;gene=EgSRO2;product=inactive poly [ADP-ribose] polymerase RCD1 isoform X2;protein_id=EgSRO2
NC_026003.1	Gnomon	gene	25583517	25583825	.	-	.	ID=EgSRO2;Dbxref=GeneID:EgSRO2;Name=EgSRO2;gbkey=Gene;gene=EgSRO2;gene_biotype=protein_coding
NC_026003.1	Gnomon	mRNA	25583514	25583758	.	-	.	ID=EgSRO2;Parent=EgSRO2;Dbxref=GeneID:EgSRO2,Genbank:EgSRO2;Name=EgSRO2;gbkey=mRNA;gene=EgSRO2;model_evidence=Supporting evidence includes similarity to: 7 ESTs%2C 6 Proteins%2C and 100%25 coverage of the annotated genomic feature by RNAseq alignments%2C including 47 samples with support for all annotated introns;product=inactive poly [ADP-ribose] polymerase RCD1%2C transcript variant X2;transcri…
NC_025996.1	Gnomon	gene	49864415	49870452	.	-	.	ID=gene-EgSRO3;Dbxref=GeneID:EgSRO3;Name=EgSRO3;end_range=49870452,.;gbkey=Gene;gene=EgSRO3;gene_biotype=protein_coding;partial=true
NC_025996.1	Gnomon	mRNA	49864415	49870452	.	-	.	ID=EgSRO3;Parent=gene-EgSRO3;Dbxref=GeneID:EgSRO3,Genbank:EgSRO3;Name=EgSRO3;Note=The sequence of the model RefSeq transcript was modified relative to this genomic sequence to represent the inferred CDS: added 436 bases not found in genome assembly;end_range=49870452,.;exception=annotated by transcript or proteomic data;gbkey=mRNA;gene=EgSRO3;inference=similar to RNA sequence (same species):INSD:…
NC_025996.1	Gnomon	CDS	49869184	49870301	.	-	0	ID=EgSRO3;Parent=EgSRO3;Dbxref=GeneID:EgSRO3,Genbank:EgSRO3;Name=EgSRO3;gbkey=CDS;gene=EgSRO3;product=inactive poly [ADP-ribose] polymerase RCD1;protein_id=EgSRO3
NC_025996.1	Gnomon	CDS	49868743	49868984	.	-	1	ID=EgSRO3;Parent=EgSRO3;Dbxref=GeneID:EgSRO3,Genbank:EgSRO3;Name=EgSRO3;gbkey=CDS;gene=EgSRO3;product=inactive poly [ADP-ribose] polymerase RCD1;protein_id=EgSRO3
NC_025996.1	Gnomon	CDS	49868569	49868645	.	-	2	ID=EgSRO3;Parent=EgSRO3;Dbxref=GeneID:EgSRO3,Genbank:EgSRO3;Name=EgSRO3;gbkey=CDS;gene=EgSRO3;product=inactive poly [ADP-ribose] polymerase RCD1;protein_id=EgSRO3
NC_025996.1	Gnomon	CDS	49868041	49868220	.	-	0	ID=EgSRO3;Parent=EgSRO3;Dbxref=GeneID:EgSRO3,Genbank:EgSRO3;Name=EgSRO3;gbkey=CDS;gene=EgSRO3;product=inactive poly [ADP-ribose] polymerase RCD1;protein_id=EgSRO3
NC_025996.1	Gnomon	CDS	49867862	49867957	.	-	0	ID=EgSRO3;Parent=EgSRO3;Dbxref=GeneID:EgSRO3,Genbank:EgSRO3;Name=EgSRO3;gbkey=CDS;gene=EgSRO3;product=inactive poly [ADP-ribose] polymerase RCD1;protein_id=EgSRO3
NC_025996.1	Gnomon	CDS	49864753	49864818	.	-	0	ID=EgSRO3;Parent=EgSRO3;Dbxref=GeneID:EgSRO3,Genbank:EgSRO3;Name=EgSRO3;gbkey=CDS;gene=EgSRO3;product=inactive poly [ADP-ribose] polymerase RCD1;protein_id=EgSRO3
NC_052399.1	Gnomon	transcript	25678311	25727464	.	+	.	ID=PdSRO1;Parent=PdSRO1;Dbxref=GeneID:PdSRO1,Genbank:PdSRO1;Name=PdSRO1;gbkey=misc_RNA;gene=PdSRO1;model_evidence=Supporting evidence includes similarity to: 1 Protein%2C and 100%25 coverage of the annotated genomic feature by RNAseq alignments%2C including 18 samples with support for all annotated introns;product=inactive poly [ADP-ribose] polymerase RCD1-like%2C transcript variant X5;transcript…
NC_052399.1	Gnomon	transcript	25678311	25727464	.	+	.	ID=PdSRO1;Parent=PdSRO1;Dbxref=GeneID:PdSRO1,Genbank:PdSRO1;Name=PdSRO1;gbkey=misc_RNA;gene=PdSRO1;model_evidence=Supporting evidence includes similarity to: 1 Protein%2C and 100%25 coverage of the annotated genomic feature by RNAseq alignments%2C including 14 samples with support for all annotated introns;product=inactive poly [ADP-ribose] polymerase RCD1-like%2C transcript variant X7;transcript…
NC_052399.1	Gnomon	mRNA	25678311	25727464	.	+	.	ID=PdSRO1;Parent=PdSRO1;Dbxref=GeneID:PdSRO1,Genbank:PdSRO1;Name=PdSRO1;gbkey=mRNA;gene=PdSRO1;model_evidence=Supporting evidence includes similarity to: 1 Protein%2C and 100%25 coverage of the annotated genomic feature by RNAseq alignments%2C including 31 samples with support for all annotated introns;product=inactive poly [ADP-ribose] polymerase RCD1-like%2C transcript variant X3;transcript_id=…
NC_052399.1	Gnomon	CDS	25679993	25680942	.	+	0	ID=PdSRO1;Parent=PdSRO1;Dbxref=GeneID:PdSRO1,Genbank:PdSRO1;Name=PdSRO1;gbkey=CDS;gene=PdSRO1;product=inactive poly [ADP-ribose] polymerase RCD1-like;protein_id=PdSRO1
NC_052399.1	Gnomon	CDS	25681161	25681402	.	+	1	ID=PdSRO1;Parent=PdSRO1;Dbxref=GeneID:PdSRO1,Genbank:PdSRO1;Name=PdSRO1;gbkey=CDS;gene=PdSRO1;product=inactive poly [ADP-ribose] polymerase RCD1-like;protein_id=PdSRO1
NC_052399.1	Gnomon	CDS	25681499	25681578	.	+	2	ID=PdSRO1;Parent=PdSRO1;Dbxref=GeneID:PdSRO1,Genbank:PdSRO1;Name=PdSRO1;gbkey=CDS;gene=PdSRO1;product=inactive poly [ADP-ribose] polymerase RCD1-like;protein_id=PdSRO1
NC_052399.1	Gnomon	CDS	25681858	25681986	.	+	0	ID=PdSRO1;Parent=PdSRO1;Dbxref=GeneID:PdSRO1,Genbank:PdSRO1;Name=PdSRO1;gbkey=CDS;gene=PdSRO1;product=inactive poly [ADP-ribose] polymerase RCD1-like;protein_id=PdSRO1
NC_052399.1	Gnomon	CDS	25682087	25682182	.	+	0	ID=PdSRO1;Parent=PdSRO1;Dbxref=GeneID:PdSRO1,Genbank:PdSRO1;Name=PdSRO1;gbkey=CDS;gene=PdSRO1;product=inactive poly [ADP-ribose] polymerase RCD1-like;protein_id=PdSRO1
NC_052399.1	Gnomon	CDS	25697909	25698793	.	+	0	ID=PdSRO1;Parent=PdSRO1;Dbxref=GeneID:PdSRO1,Genbank:PdSRO1;Name=PdSRO1;gbkey=CDS;gene=PdSRO1;product=inactive poly [ADP-ribose] polymerase RCD1-like;protein_id=PdSRO1
NC_052399.1	Gnomon	mRNA	25678311	25727464	.	+	.	ID=PdSRO1;Parent=PdSRO1;Dbxref=GeneID:PdSRO1,Genbank:XM_008808402.4;Name=XM_008808402.4;gbkey=mRNA;gene=PdSRO1;model_evidence=Supporting evidence includes similarity to: 1 Protein%2C and 100%25 coverage of the annotated genomic feature by RNAseq alignments%2C including 76 samples with support for all annotated introns;product=inactive poly [ADP-ribose] polymerase RCD1-like%2C transcript variant X…
NC_052399.1	Gnomon	CDS	25679993	25680942	.	+	0	ID=PdSRO1;Parent=PdSRO1;Dbxref=GeneID:PdSRO1,Genbank:PdSRO1;Name=PdSRO1;gbkey=CDS;gene=PdSRO1;product=inactive poly [ADP-ribose] polymerase RCD1-like;protein_id=PdSRO1
NC_052399.1	Gnomon	CDS	25681161	25681402	.	+	1	ID=PdSRO1;Parent=PdSRO1;Dbxref=GeneID:PdSRO1,Genbank:PdSRO1;Name=PdSRO1;gbkey=CDS;gene=PdSRO1;product=inactive poly [ADP-ribose] polymerase RCD1-like;protein_id=PdSRO1
NC_052399.1	Gnomon	CDS	25681499	25681578	.	+	2	ID=PdSRO1;Parent=PdSRO1;Dbxref=GeneID:PdSRO1,Genbank:PdSRO1;Name=PdSRO1;gbkey=CDS;gene=PdSRO1;product=inactive poly [ADP-ribose] polymerase RCD1-like;protein_id=PdSRO1
NC_052399.1	Gnomon	CDS	25681858	25681986	.	+	0	ID=PdSRO1;Parent=PdSRO1;Dbxref=GeneID:PdSRO1,Genbank:PdSRO1;Name=PdSRO1;gbkey=CDS;gene=PdSRO1;product=inactive poly [ADP-ribose] polymerase RCD1-like;protein_id=PdSRO1
NC_052399.1	Gnomon	CDS	25682087	25682182	.	+	0	ID=PdSRO1;Parent=PdSRO1;Dbxref=GeneID:PdSRO1,Genbank:PdSRO1;Name=PdSRO1;gbkey=CDS;gene=PdSRO1;product=inactive poly [ADP-ribose] polymerase RCD1-like;protein_id=PdSRO1
NC_052399.1	Gnomon	CDS	25697909	25698793	.	+	0	ID=PdSRO1;Parent=PdSRO1;Dbxref=GeneID:PdSRO1,Genbank:PdSRO1;Name=PdSRO1;gbkey=CDS;gene=PdSRO1;product=inactive poly [ADP-ribose] polymerase RCD1-like;protein_id=PdSRO1
NC_052399.1	Gnomon	mRNA	25678311	25713069	.	+	.	ID=PdSRO1;Parent=PdSRO1;Dbxref=GeneID:PdSRO1,Genbank:XM_026809307.2;Name=XM_026809307.2;gbkey=mRNA;gene=PdSRO1;model_evidence=Supporting evidence includes similarity to: 1 Protein%2C and 100%25 coverage of the annotated genomic feature by RNAseq alignments%2C including 48 samples with support for all annotated introns;product=inactive poly [ADP-ribose] polymerase RCD1-like%2C transcript variant X…
NC_052399.1	Gnomon	CDS	25679993	25680942	.	+	0	ID=PdSRO1;Parent=PdSRO1;Dbxref=GeneID:PdSRO1,Genbank:PdSRO1;Name=PdSRO1;gbkey=CDS;gene=PdSRO1;product=inactive poly [ADP-ribose] polymerase RCD1-like;protein_id=PdSRO1
NC_052399.1	Gnomon	CDS	25681161	25681402	.	+	1	ID=PdSRO1;Parent=PdSRO1;Dbxref=GeneID:PdSRO1,Genbank:PdSRO1;Name=PdSRO1;gbkey=CDS;gene=PdSRO1;product=inactive poly [ADP-ribose] polymerase RCD1-like;protein_id=PdSRO1
NC_052399.1	Gnomon	CDS	25681499	25681578	.	+	2	ID=PdSRO1;Parent=PdSRO1;Dbxref=GeneID:PdSRO1,Genbank:PdSRO1;Name=PdSRO1;gbkey=CDS;gene=PdSRO1;product=inactive poly [ADP-ribose] polymerase RCD1-like;protein_id=PdSRO1
NC_052399.1	Gnomon	CDS	25681858	25681986	.	+	0	ID=PdSRO1;Parent=PdSRO1;Dbxref=GeneID:PdSRO1,Genbank:PdSRO1;Name=PdSRO1;gbkey=CDS;gene=PdSRO1;product=inactive poly [ADP-ribose] polymerase RCD1-like;protein_id=PdSRO1
NC_052399.1	Gnomon	CDS	25682087	25682182	.	+	0	ID=PdSRO1;Parent=PdSRO1;Dbxref=GeneID:PdSRO1,Genbank:PdSRO1;Name=PdSRO1;gbkey=CDS;gene=PdSRO1;product=inactive poly [ADP-ribose] polymerase RCD1-like;protein_id=PdSRO1
NC_052399.1	Gnomon	CDS	25697909	25698793	.	+	0	ID=PdSRO1;Parent=PdSRO1;Dbxref=GeneID:PdSRO1,Genbank:PdSRO1;Name=PdSRO1;gbkey=CDS;gene=PdSRO1;product=inactive poly [ADP-ribose] polymerase RCD1-like;protein_id=PdSRO1
NC_052399.1	Gnomon	mRNA	25678311	25699141	.	+	.	ID=PdSRO1;Parent=PdSRO1;Dbxref=GeneID:PdSRO1,Genbank:XM_026809306.2;Name=XM_026809306.2;gbkey=mRNA;gene=PdSRO1;model_evidence=Supporting evidence includes similarity to: 1 Protein%2C and 100%25 coverage of the annotated genomic feature by RNAseq alignments%2C including 56 samples with support for all annotated introns;product=inactive poly [ADP-ribose] polymerase RCD1-like%2C transcript variant X…
NC_052399.1	Gnomon	CDS	25679993	25680942	.	+	0	ID=PdSRO1;Parent=PdSRO1;Dbxref=GeneID:PdSRO1,Genbank:PdSRO1;Name=PdSRO1;gbkey=CDS;gene=PdSRO1;product=inactive poly [ADP-ribose] polymerase RCD1-like;protein_id=PdSRO1
NC_052399.1	Gnomon	CDS	25681161	25681402	.	+	1	ID=PdSRO1;Parent=PdSRO1;Dbxref=GeneID:PdSRO1,Genbank:PdSRO1;Name=PdSRO1;gbkey=CDS;gene=PdSRO1;product=inactive poly [ADP-ribose] polymerase RCD1-like;protein_id=PdSRO1
NC_052399.1	Gnomon	CDS	25681499	25681578	.	+	2	ID=PdSRO1;Parent=PdSRO1;Dbxref=GeneID:PdSRO1,Genbank:PdSRO1;Name=PdSRO1;gbkey=CDS;gene=PdSRO1;product=inactive poly [ADP-ribose] polymerase RCD1-like;protein_id=PdSRO1
NC_052399.1	Gnomon	CDS	25681858	25681986	.	+	0	ID=PdSRO1;Parent=PdSRO1;Dbxref=GeneID:PdSRO1,Genbank:PdSRO1;Name=PdSRO1;gbkey=CDS;gene=PdSRO1;product=inactive poly [ADP-ribose] polymerase RCD1-like;protein_id=PdSRO1
NC_052399.1	Gnomon	CDS	25682087	25682182	.	+	0	ID=PdSRO1;Parent=PdSRO1;Dbxref=GeneID:PdSRO1,Genbank:PdSRO1;Name=PdSRO1;gbkey=CDS;gene=PdSRO1;product=inactive poly [ADP-ribose] polymerase RCD1-like;protein_id=PdSRO1
NC_052399.1	Gnomon	CDS	25697909	25698793	.	+	0	ID=PdSRO1;Parent=PdSRO1;Dbxref=GeneID:PdSRO1,Genbank:PdSRO1;Name=PdSRO1;gbkey=CDS;gene=PdSRO1;product=inactive poly [ADP-ribose] polymerase RCD1-like;protein_id=PdSRO1
NC_052399.1	Gnomon	mRNA	25678312	25699141	.	+	.	ID=PdSRO1;Parent=PdSRO1;Dbxref=GeneID:PdSRO1,Genbank:PdSRO1;Name=PdSRO1;gbkey=mRNA;gene=PdSRO1;model_evidence=Supporting evidence includes similarity to: 1 Protein%2C and 100%25 coverage of the annotated genomic feature by RNAseq alignments%2C including 85 samples with support for all annotated introns;product=inactive poly [ADP-ribose] polymerase RCD1-like%2C transcript variant X1;transcript_id=…
NC_052399.1	Gnomon	CDS	25679993	25680942	.	+	0	ID=PdSRO1;Parent=PdSRO1;Dbxref=GeneID:PdSRO1,Genbank:PdSRO1;Name=PdSRO1;gbkey=CDS;gene=PdSRO1;product=inactive poly [ADP-ribose] polymerase RCD1-like;protein_id=PdSRO1
NC_052399.1	Gnomon	CDS	25681161	25681402	.	+	1	ID=PdSRO1;Parent=PdSRO1;Dbxref=GeneID:PdSRO1,Genbank:PdSRO1;Name=PdSRO1;gbkey=CDS;gene=PdSRO1;product=inactive poly [ADP-ribose] polymerase RCD1-like;protein_id=PdSRO1
NC_052399.1	Gnomon	CDS	25681499	25681578	.	+	2	ID=PdSRO1;Parent=PdSRO1;Dbxref=GeneID:PdSRO1,Genbank:PdSRO1;Name=PdSRO1;gbkey=CDS;gene=PdSRO1;product=inactive poly [ADP-ribose] polymerase RCD1-like;protein_id=PdSRO1
NC_052399.1	Gnomon	CDS	25681858	25681986	.	+	0	ID=PdSRO1;Parent=PdSRO1;Dbxref=GeneID:PdSRO1,Genbank:PdSRO1;Name=PdSRO1;gbkey=CDS;gene=PdSRO1;product=inactive poly [ADP-ribose] polymerase RCD1-like;protein_id=PdSRO1
NC_052399.1	Gnomon	CDS	25682087	25682182	.	+	0	ID=PdSRO1;Parent=PdSRO1;Dbxref=GeneID:PdSRO1,Genbank:PdSRO1;Name=PdSRO1;gbkey=CDS;gene=PdSRO1;product=inactive poly [ADP-ribose] polymerase RCD1-like;protein_id=PdSRO1
NC_052399.1	Gnomon	CDS	25697909	25698793	.	+	0	ID=PdSRO1;Parent=PdSRO1;Dbxref=GeneID:PdSRO1,Genbank:PdSRO1;Name=PdSRO1;gbkey=CDS;gene=PdSRO1;product=inactive poly [ADP-ribose] polymerase RCD1-like;protein_id=PdSRO1
NC_052393.1	Gnomon	gene	5487578	5498374	.	+	.	ID=PdSRO2;Dbxref=GeneID:PdSRO2;Name=PdSRO2;gbkey=Gene;gene=PdSRO2;gene_biotype=protein_coding
NC_052393.1	Gnomon	mRNA	5487578	5498374	.	+	.	ID=PdSRO2;Parent=PdSRO2;Dbxref=GeneID:PdSRO2,Genbank:PdSRO2;Name=PdSRO2;gbkey=mRNA;gene=PdSRO2;model_evidence=Supporting evidence includes similarity to: 1 EST%2C 3 Proteins%2C and 100%25 coverage of the annotated genomic feature by RNAseq alignments%2C including 91 samples with support for all annotated introns;product=inactive poly [ADP-ribose] polymerase RCD1-like%2C transcript variant X3;tran…
NC_052393.1	Gnomon	CDS	5492759	5493876	.	+	0	ID=PdSRO2;Parent=PdSRO2;Dbxref=GeneID:PdSRO2,Genbank:PdSRO2;Name=PdSRO2;gbkey=CDS;gene=PdSRO2;product=inactive poly [ADP-ribose] polymerase RCD1-like;protein_id=PdSRO2
NC_052393.1	Gnomon	CDS	5494077	5494318	.	+	1	ID=PdSRO2;Parent=PdSRO2;Dbxref=GeneID:PdSRO2,Genbank:PdSRO2;Name=PdSRO2;gbkey=CDS;gene=PdSRO2;product=inactive poly [ADP-ribose] polymerase RCD1-like;protein_id=PdSRO2
NC_052393.1	Gnomon	CDS	5494418	5494494	.	+	2	ID=PdSRO2;Parent=PdSRO2;Dbxref=GeneID:PdSRO2,Genbank:PdSRO2;Name=PdSRO2;gbkey=CDS;gene=PdSRO2;product=inactive poly [ADP-ribose] polymerase RCD1-like;protein_id=PdSRO2
NC_052393.1	Gnomon	CDS	5494890	5495069	.	+	0	ID=PdSRO2;Parent=PdSRO2;Dbxref=GeneID:PdSRO2,Genbank:PdSRO2;Name=PdSRO2;gbkey=CDS;gene=PdSRO2;product=inactive poly [ADP-ribose] polymerase RCD1-like;protein_id=PdSRO2
NC_052393.1	Gnomon	CDS	5495154	5495249	.	+	0	ID=PdSRO2;Parent=PdSRO2;Dbxref=GeneID:PdSRO2,Genbank:PdSRO2;Name=PdSRO2;gbkey=CDS;gene=PdSRO2;product=inactive poly [ADP-ribose] polymerase RCD1-like;protein_id=PdSRO2
NC_052393.1	Gnomon	CDS	5498000	5498065	.	+	0	ID=PdSRO2;Parent=PdSRO2;Dbxref=GeneID:PdSRO2,Genbank:PdSRO2;Name=PdSRO2;gbkey=CDS;gene=PdSRO2;product=inactive poly [ADP-ribose] polymerase RCD1-like;protein_id=PdSRO2
NC_052393.1	Gnomon	mRNA	5487578	5498373	.	+	.	ID=PdSRO2;Parent=PdSRO2;Dbxref=GeneID:PdSRO2,Genbank:PdSRO2;Name=PdSRO2;gbkey=mRNA;gene=PdSRO2;model_evidence=Supporting evidence includes similarity to: 1 EST%2C 3 Proteins%2C and 100%25 coverage of the annotated genomic feature by RNAseq alignments%2C including 100 samples with support for all annotated introns;product=inactive poly [ADP-ribose] polymerase RCD1-like%2C transcript variant X2;tra…
NC_052393.1	Gnomon	CDS	5492759	5493876	.	+	0	ID=PdSRO2;Parent=PdSRO2;Dbxref=GeneID:PdSRO2,Genbank:PdSRO2;Name=PdSRO2;gbkey=CDS;gene=PdSRO2;product=inactive poly [ADP-ribose] polymerase RCD1-like;protein_id=PdSRO2
NC_052393.1	Gnomon	CDS	5494077	5494318	.	+	1	ID=PdSRO2;Parent=PdSRO2;Dbxref=GeneID:PdSRO2,Genbank:PdSRO2;Name=PdSRO2;gbkey=CDS;gene=PdSRO2;product=inactive poly [ADP-ribose] polymerase RCD1-like;protein_id=PdSRO2
NC_052393.1	Gnomon	CDS	5494418	5494494	.	+	2	ID=PdSRO2;Parent=PdSRO2;Dbxref=GeneID:PdSRO2,Genbank:PdSRO2;Name=PdSRO2;gbkey=CDS;gene=PdSRO2;product=inactive poly [ADP-ribose] polymerase RCD1-like;protein_id=PdSRO2
NC_052393.1	Gnomon	CDS	5494890	5495069	.	+	0	ID=PdSRO2;Parent=PdSRO2;Dbxref=GeneID:PdSRO2,Genbank:PdSRO2;Name=PdSRO2;gbkey=CDS;gene=PdSRO2;product=inactive poly [ADP-ribose] polymerase RCD1-like;protein_id=PdSRO2
NC_052393.1	Gnomon	CDS	5495154	5495249	.	+	0	ID=PdSRO2;Parent=PdSRO2;Dbxref=GeneID:PdSRO2,Genbank:PdSRO2;Name=PdSRO2;gbkey=CDS;gene=PdSRO2;product=inactive poly [ADP-ribose] polymerase RCD1-like;protein_id=PdSRO2
NC_052393.1	Gnomon	CDS	5498000	5498065	.	+	0	ID=PdSRO2;Parent=PdSRO2;Dbxref=GeneID:PdSRO2,Genbank:PdSRO2;Name=PdSRO2;gbkey=CDS;gene=PdSRO2;product=inactive poly [ADP-ribose] polymerase RCD1-like;protein_id=PdSRO2
NC_052393.1	Gnomon	mRNA	5487614	5498350	.	+	.	ID=PdSRO2;Parent=PdSRO2;Dbxref=GeneID:PdSRO2,Genbank:XM_008801847.4;Name=XM_008801847.4;gbkey=mRNA;gene=PdSRO2;model_evidence=Supporting evidence includes similarity to: 1 EST%2C 3 Proteins%2C and 100%25 coverage of the annotated genomic feature by RNAseq alignments%2C including 96 samples with support for all annotated introns;product=inactive poly [ADP-ribose] polymerase RCD1-like%2C transcript…
NC_052393.1	Gnomon	CDS	5492759	5493876	.	+	0	ID=PdSRO2;Parent=PdSRO2;Dbxref=GeneID:PdSRO2,Genbank:PdSRO2;Name=PdSRO2;gbkey=CDS;gene=PdSRO2;product=inactive poly [ADP-ribose] polymerase RCD1-like;protein_id=PdSRO2
NC_052393.1	Gnomon	CDS	5494077	5494318	.	+	1	ID=PdSRO2;Parent=PdSRO2;Dbxref=GeneID:PdSRO2,Genbank:PdSRO2;Name=PdSRO2;gbkey=CDS;gene=PdSRO2;product=inactive poly [ADP-ribose] polymerase RCD1-like;protein_id=PdSRO2
NC_052393.1	Gnomon	CDS	5494418	5494494	.	+	2	ID=PdSRO2;Parent=PdSRO2;Dbxref=GeneID:PdSRO2,Genbank:PdSRO2;Name=PdSRO2;gbkey=CDS;gene=PdSRO2;product=inactive poly [ADP-ribose] polymerase RCD1-like;protein_id=PdSRO2
NC_052393.1	Gnomon	CDS	5494890	5495069	.	+	0	ID=PdSRO2;Parent=PdSRO2;Dbxref=GeneID:PdSRO2,Genbank:PdSRO2;Name=PdSRO2;gbkey=CDS;gene=PdSRO2;product=inactive poly [ADP-ribose] polymerase RCD1-like;protein_id=PdSRO2
NC_052393.1	Gnomon	CDS	5495154	5495249	.	+	0	ID=PdSRO2;Parent=PdSRO2;Dbxref=GeneID:PdSRO2,Genbank:PdSRO2;Name=PdSRO2;gbkey=CDS;gene=PdSRO2;product=inactive poly [ADP-ribose] polymerase RCD1-like;protein_id=PdSRO2
NC_052393.1	Gnomon	CDS	5498000	5498065	.	+	0	ID=PdSRO2;Parent=PdSRO2;Dbxref=GeneID:PdSRO2,Genbank:PdSRO2;Name=PdSRO2;gbkey=CDS;gene=PdSRO2;product=inactive poly [ADP-ribose] polymerase RCD1-like;protein_id=PdSRO2
NC_052396.1	Gnomon	mRNA	778750	799448	.	+	.	ID=PdSRO3;Parent=PdSRO3;Dbxref=GeneID:PdSRO3,Genbank:XM_017845191.3;Name=XM_017845191.3;gbkey=mRNA;gene=PdSRO3;model_evidence=Supporting evidence includes similarity to: 5 ESTs%2C 3 Proteins%2C and 100%25 coverage of the annotated genomic feature by RNAseq alignments%2C including 105 samples with support for all annotated introns;product=probable inactive poly [ADP-ribose] polymerase SRO1%2C tran…
NC_052396.1	Gnomon	CDS	794525	795639	.	+	0	ID=PdSRO3;Parent=PdSRO3;Dbxref=GeneID:PdSRO3,Genbank:PdSRO3;Name=PdSRO3;gbkey=CDS;gene=PdSRO3;product=probable inactive poly [ADP-ribose] polymerase SRO1;protein_id=PdSRO3
NC_052396.1	Gnomon	CDS	795858	796099	.	+	1	ID=PdSRO3;Parent=PdSRO3;Dbxref=GeneID:PdSRO3,Genbank:PdSRO3;Name=PdSRO3;gbkey=CDS;gene=PdSRO3;product=probable inactive poly [ADP-ribose] polymerase SRO1;protein_id=PdSRO3
NC_052396.1	Gnomon	CDS	796196	796272	.	+	2	ID=PdSRO3;Parent=PdSRO3;Dbxref=GeneID:PdSRO3,Genbank:PdSRO3;Name=PdSRO3;gbkey=CDS;gene=PdSRO3;product=probable inactive poly [ADP-ribose] polymerase SRO1;protein_id=PdSRO3
NC_052396.1	Gnomon	CDS	796659	796838	.	+	0	ID=PdSRO3;Parent=PdSRO3;Dbxref=GeneID:PdSRO3,Genbank:PdSRO3;Name=PdSRO3;gbkey=CDS;gene=PdSRO3;product=probable inactive poly [ADP-ribose] polymerase SRO1;protein_id=PdSRO3
NC_052396.1	Gnomon	CDS	796922	797017	.	+	0	ID=PdSRO3;Parent=PdSRO3;Dbxref=GeneID:PdSRO3,Genbank:PdSRO3;Name=PdSRO3;gbkey=CDS;gene=PdSRO3;product=probable inactive poly [ADP-ribose] polymerase SRO1;protein_id=PdSRO3
NC_052396.1	Gnomon	CDS	799120	799185	.	+	0	ID=PdSRO3;Parent=PdSRO3;Dbxref=GeneID:PdSRO3,Genbank:PdSRO3;Name=PdSRO3;gbkey=CDS;gene=PdSRO3;product=probable inactive poly [ADP-ribose] polymerase SRO1;protein_id=PdSRO3
NC_052396.1	Gnomon	mRNA	778827	799403	.	+	.	ID=PdSRO3;Parent=PdSRO3;Dbxref=GeneID:PdSRO3,Genbank:XM_008805369.4;Name=XM_008805369.4;gbkey=mRNA;gene=PdSRO3;model_evidence=Supporting evidence includes similarity to: 5 ESTs%2C 3 Proteins%2C and 100%25 coverage of the annotated genomic feature by RNAseq alignments%2C including 75 samples with support for all annotated introns;product=probable inactive poly [ADP-ribose] polymerase SRO1%2C trans…
NC_052396.1	Gnomon	CDS	794525	795639	.	+	0	ID=PdSRO3;Parent=PdSRO3;Dbxref=GeneID:PdSRO3,Genbank:PdSRO3;Name=PdSRO3;gbkey=CDS;gene=PdSRO3;product=probable inactive poly [ADP-ribose] polymerase SRO1;protein_id=PdSRO3
NC_052396.1	Gnomon	CDS	795858	796099	.	+	1	ID=PdSRO3;Parent=PdSRO3;Dbxref=GeneID:PdSRO3,Genbank:PdSRO3;Name=PdSRO3;gbkey=CDS;gene=PdSRO3;product=probable inactive poly [ADP-ribose] polymerase SRO1;protein_id=PdSRO3
NC_052396.1	Gnomon	CDS	796196	796272	.	+	2	ID=PdSRO3;Parent=PdSRO3;Dbxref=GeneID:PdSRO3,Genbank:PdSRO3;Name=PdSRO3;gbkey=CDS;gene=PdSRO3;product=probable inactive poly [ADP-ribose] polymerase SRO1;protein_id=PdSRO3
NC_052396.1	Gnomon	CDS	796659	796838	.	+	0	ID=PdSRO3;Parent=PdSRO3;Dbxref=GeneID:PdSRO3,Genbank:PdSRO3;Name=PdSRO3;gbkey=CDS;gene=PdSRO3;product=probable inactive poly [ADP-ribose] polymerase SRO1;protein_id=PdSRO3
NC_052396.1	Gnomon	CDS	796922	797017	.	+	0	ID=PdSRO3;Parent=PdSRO3;Dbxref=GeneID:PdSRO3,Genbank:PdSRO3;Name=PdSRO3;gbkey=CDS;gene=PdSRO3;product=probable inactive poly [ADP-ribose] polymerase SRO1;protein_id=PdSRO3
NC_052396.1	Gnomon	CDS	799120	799185	.	+	0	ID=PdSRO3;Parent=PdSRO3;Dbxref=GeneID:PdSRO3,Genbank:PdSRO3;Name=PdSRO3;gbkey=CDS;gene=PdSRO3;product=probable inactive poly [ADP-ribose] polymerase SRO1;protein_id=PdSRO3
chr7	gbrowse	mRNA	5424973	5429520	.	+	.	ID=MdRCD1;Name=MdRCD1;Ontology_term="GO:0003950","GO:0005634",;Note= predicted with fgenesh_arab, NAD+ ADP-ribosyltransferase activity molecular function Catalysis of the reaction: NAD+ + (ADP-D-ribosyl)(n)-acceptor = nicotinamide + (ADP-D-ribosyl)(n+1)-acceptor., nucleus cellular component A membrane-bounded organelle of eukaryotic cells in which chromosomes are housed and replicated. In most ce…
chr7	gbrowse	CDS	5424973	5426096	.	+	0	ID=MdRCD1;Parent=MdRCD1;CONTIG=MDC006553.299
chr7	gbrowse	CDS	5426710	5426993	.	+	0	ID=MdRCD1;Parent=MdRCD1;CONTIG=MDC006553.299
chr7	gbrowse	CDS	5427372	5427460	.	+	0	ID=MdRCD1;Parent=MdRCD1;CONTIG=MDC006553.299
chr7	gbrowse	CDS	5428436	5428663	.	+	0	ID=MdRCD1;Parent=MdRCD1;CONTIG=MDC006553.299
chr7	gbrowse	CDS	5428764	5428859	.	+	0	ID=MdRCD1;Parent=MdRCD1;CONTIG=MDC006553.299
chr7	gbrowse	CDS	5429434	5429520	.	+	0	ID=MdRCD1_exon_6;Parent=MdRCD1;CONTIG=MDC006553.299
chr2	gbrowse	mRNA	29886919	29891034	.	-	.	ID=MdSRO1;Name=MdSRO1;Ontology_term="GO:0003950","GO:0005634",;Note= predicted with fgenesh_arab, NAD+ ADP-ribosyltransferase activity molecular function Catalysis of the reaction: NAD+ + (ADP-D-ribosyl)(n)-acceptor = nicotinamide + (ADP-D-ribosyl)(n+1)-acceptor., nucleus cellular component A membrane-bounded organelle of eukaryotic cells in which chromosomes are housed and replicated. In most ce…
chr2	gbrowse	CDS	29889911	29891034	.	-	0	ID=MdSRO1;Parent=MdSRO1;CONTIG=MDC018041.243
chr2	gbrowse	CDS	29889048	29889331	.	-	0	ID=MdSRO1;Parent=MdSRO1;CONTIG=MDC018041.243
chr2	gbrowse	CDS	29888580	29888668	.	-	0	ID=MdSRO1;Parent=MdSRO1;CONTIG=MDC018041.243
chr2	gbrowse	CDS	29887892	29888080	.	-	0	ID=MdSRO1;Parent=MdSRO1;CONTIG=MDC018041.243
chr2	gbrowse	CDS	29887651	29887746	.	-	0	ID=MdSRO1;Parent=MdSRO1;CONTIG=MDC018041.243
chr2	gbrowse	CDS	29887147	29887214	.	-	0	ID=MdSRO1;Parent=MdSRO1;CONTIG=MDC018041.243
chr2	gbrowse	CDS	29886919	29886958	.	-	0	ID=MdSRO1;Parent=MdSRO1;CONTIG=MDC018041.243
chr13	gbrowse	mRNA	6125593	6126946	.	+	.	ID=MdSRO2;Name=MdSRO2;Ontology_term="GO:0003950","GO:0005634",;Note= predicted with glimmer, NAD+ ADP-ribosyltransferase activity molecular function Catalysis of the reaction: NAD+ + (ADP-D-ribosyl)(n)-acceptor = nicotinamide + (ADP-D-ribosyl)(n+1)-acceptor., nucleus cellular component A membrane-bounded organelle of eukaryotic cells in which chromosomes are housed and replicated. In most cells, …
chr13	gbrowse	CDS	6125593	6126080	.	+	0	ID=MdSRO2;Parent=MdSRO2;CONTIG=MDC012539.194
chr13	gbrowse	CDS	6126219	6126463	.	+	0	ID=MdSRO2;Parent=MdSRO2;CONTIG=MDC012539.194
chr13	gbrowse	CDS	6126580	6126731	.	+	0	ID=MdSRO2;Parent=MdSRO2;CONTIG=MDC012539.194
chr13	gbrowse	CDS	6126827	6126946	.	+	0	ID=MdSRO2;Parent=MdSRO2;CONTIG=MDC012539.194
chr15	gbrowse	mRNA	40145782	40147482	.	-	.	ID=MdSRO3;Name=MdSRO3;Ontology_term="GO:0016757","GO:0003950","GO:0005634",;Note= predicted with glimmer, transferase activity, transferring glycosyl groups molecular function Catalysis of the transfer of a glycosyl group from one compound (donor) to another (acceptor)." [GOC:jl, ISBN:0198506732 "Oxford Dictionary of Biochemistry and Molecular Biology, NAD+ ADP-ribosyltransferase activity molecul…
chr15	gbrowse	CDS	40145782	40145892	.	-	0	ID=MdSRO3;Parent=MdSRO3;CONTIG=MDC011693.349
chr15	gbrowse	CDS	40146017	40146126	.	-	0	ID=MdSRO3;Parent=MdSRO3;CONTIG=MDC011693.349
chr15	gbrowse	CDS	40146223	40146461	.	-	0	ID=MdSRO3;Parent=MdSRO3;CONTIG=MDC011693.349
chr15	gbrowse	CDS	40146575	40147482	.	-	0	ID=MdSRO3;Parent=MdSRO3;CONTIG=MDC011693.349
chr6	gbrowse	mRNA	19662168	19675755	.	-	.	ID=MdSRO4;Name=MdSRO4;Ontology_term="GO:0003950","GO:0005634",;Note= predicted with glimmer, NAD+ ADP-ribosyltransferase activity molecular function Catalysis of the reaction: NAD+ + (ADP-D-ribosyl)(n)-acceptor = nicotinamide + (ADP-D-ribosyl)(n+1)-acceptor., nucleus cellular component A membrane-bounded organelle of eukaryotic cells in which chromosomes are housed and replicated. In most cells, …
chr6	gbrowse	CDS	19662168	19662317	.	-	0	ID=MdSRO4;Parent=MdSRO4;CONTIG=MDC004401.181
chr6	gbrowse	CDS	19666566	19667318	.	-	0	ID=MdSRO4;Parent=MdSRO4;CONTIG=MDC004401.181
chr6	gbrowse	CDS	19667328	19667496	.	-	0	ID=MdSRO4;Parent=MdSRO4;CONTIG=MDC004401.181
chr6	gbrowse	CDS	19673787	19673848	.	-	0	ID=MdSRO4;Parent=MdSRO4;CONTIG=MDC004401.181
chr6	gbrowse	CDS	19674396	19674491	.	-	0	ID=MdSRO4;Parent=MdSRO4;CONTIG=MDC004401.181
chr6	gbrowse	CDS	19674594	19674730	.	-	0	ID=MdSRO4;Parent=MdSRO4;CONTIG=MDC004401.181
chr6	gbrowse	CDS	19674819	19675060	.	-	0	ID=MdSRO4;Parent=MdSRO4;CONTIG=MDC004401.181
chr6	gbrowse	CDS	19675205	19675755	.	-	0	ID=MdSRO4;Parent=MdSRO4;CONTIG=MDC004401.181
chr6	gbrowse	mRNA	19662168	19675755	.	-	.	ID=MdSRO5;Name=MdSRO5;Ontology_term="GO:0003950","GO:0005634",;Note= predicted with glimmer, NAD+ ADP-ribosyltransferase activity molecular function Catalysis of the reaction: NAD+ + (ADP-D-ribosyl)(n)-acceptor = nicotinamide + (ADP-D-ribosyl)(n+1)-acceptor., nucleus cellular component A membrane-bounded organelle of eukaryotic cells in which chromosomes are housed and replicated. In most cells, …
chr6	gbrowse	CDS	19662168	19662317	.	-	0	ID=MdSRO5;Parent=MdSRO5;CONTIG=MDC004401.181
chr6	gbrowse	CDS	19666566	19667318	.	-	0	ID=MdSRO5;Parent=MdSRO5;CONTIG=MDC004401.181
chr6	gbrowse	CDS	19667328	19667496	.	-	0	ID=MdSRO5;Parent=MdSRO5;CONTIG=MDC004401.181
chr6	gbrowse	CDS	19673787	19673848	.	-	0	ID=MdSRO5;Parent=MdSRO5;CONTIG=MDC004401.181
chr6	gbrowse	CDS	19674396	19674491	.	-	0	ID=MdSRO5;Parent=MdSRO5;CONTIG=MDC004401.181
chr6	gbrowse	CDS	19674594	19674730	.	-	0	ID=MdSRO5;Parent=MdSRO5;CONTIG=MDC004401.181
chr6	gbrowse	CDS	19674819	19675060	.	-	0	ID=MdSRO5;Parent=MdSRO5;CONTIG=MDC004401.181
chr6	gbrowse	CDS	19675205	19675755	.	-	0	ID=MdSRO5;Parent=MdSRO5;CONTIG=MDC004401.181
1	ensembl	gene	29679851	29683545	.	-	.	ID=gene:ZmSRO1;biotype=protein_coding;description=Zm00001e000929;gene_id=ZmSRO1;logic_name=cshl_gene
1	ensembl	mRNA	29679851	29683545	.	-	.	ID=transcript:ZmSRO1;Parent=gene:ZmSRO1;biotype=protein_coding;transcript_id=ZmSRO1
1	ensembl	three_prime_UTR	29679851	29680255	.	-	.	Parent=transcript:ZmSRO1
1	ensembl	CDS	29680256	29680354	.	-	0	ID=CDS:ZmSRO1;Parent=transcript:ZmSRO1;protein_id=ZmSRO1
1	ensembl	CDS	29680745	29680881	.	-	2	ID=CDS:ZmSRO1;Parent=transcript:ZmSRO1;protein_id=ZmSRO1
1	ensembl	CDS	29680968	29681215	.	-	1	ID=CDS:ZmSRO1;Parent=transcript:ZmSRO1;protein_id=ZmSRO1
1	ensembl	CDS	29682415	29683226	.	-	0	ID=CDS:ZmSRO1;Parent=transcript:ZmSRO1;protein_id=ZmSRO1
1	ensembl	five_prime_UTR	29683227	29683545	.	-	.	Parent=transcript:ZmSRO1
1	ensembl	mRNA	29680626	29683545	.	-	.	ID=transcript:ZmSRO1;Parent=gene:ZmSRO1;biotype=protein_coding;transcript_id=ZmSRO1
1	ensembl	three_prime_UTR	29680626	29680732	.	-	.	Parent=transcript:ZmSRO1
1	ensembl	CDS	29680733	29680881	.	-	2	ID=CDS:ZmSRO1;Parent=transcript:ZmSRO1;protein_id=ZmSRO1
1	ensembl	CDS	29680968	29681215	.	-	1	ID=CDS:ZmSRO1;Parent=transcript:ZmSRO1;protein_id=ZmSRO1
1	ensembl	CDS	29682415	29683226	.	-	0	ID=CDS:ZmSRO1;Parent=transcript:ZmSRO1;protein_id=ZmSRO1
1	ensembl	five_prime_UTR	29683227	29683545	.	-	.	Parent=transcript:ZmSRO1
1	ensembl	gene	105456898	105460519	.	+	.	ID=gene:ZmSRO2;biotype=protein_coding;description=ZmSRO2;gene_id=ZmSRO2;logic_name=cshl_gene
1	ensembl	mRNA	105456898	105460519	.	+	.	ID=transcript:ZmSRO2;Parent=gene:ZmSRO2;biotype=protein_coding;transcript_id=ZmSRO2
1	ensembl	five_prime_UTR	105456898	105456969	.	+	.	Parent=transcript:ZmSRO2
1	ensembl	CDS	105456970	105457209	.	+	0	ID=CDS:ZmSRO2;Parent=transcript:ZmSRO2;protein_id=ZmSRO2
1	ensembl	CDS	105457919	105458109	.	+	0	ID=CDS:ZmSRO2;Parent=transcript:ZmSRO2;protein_id=ZmSRO2
1	ensembl	CDS	105458182	105458376	.	+	1	ID=CDS:ZmSRO2;Parent=transcript:ZmSRO2;protein_id=ZmSRO2
1	ensembl	CDS	105458551	105458612	.	+	1	ID=CDS:ZmSRO2;Parent=transcript:ZmSRO2;protein_id=ZmSRO2
1	ensembl	CDS	105458739	105458805	.	+	2	ID=CDS:ZmSRO2;Parent=transcript:ZmSRO2;protein_id=ZmSRO2
1	ensembl	CDS	105458897	105459015	.	+	1	ID=CDS:ZmSRO2;Parent=transcript:ZmSRO2;protein_id=ZmSRO2
1	ensembl	CDS	105459110	105459286	.	+	2	ID=CDS:ZmSRO2;Parent=transcript:ZmSRO2;protein_id=ZmSRO2
1	ensembl	CDS	105459400	105459503	.	+	2	ID=CDS:ZmSRO2;Parent=transcript:ZmSRO2;protein_id=ZmSRO2
1	ensembl	three_prime_UTR	105459504	105460519	.	+	.	Parent=transcript:ZmSRO2
4	ensembl	mRNA	188296864	188303415	.	-	.	ID=transcript:ZmSRO3;Parent=gene:ZmSRO3;biotype=protein_coding;transcript_id=ZmSRO3
4	ensembl	three_prime_UTR	188296864	188297353	.	-	.	Parent=transcript:ZmSRO3
4	ensembl	CDS	188297354	188297385	.	-	2	ID=CDS:ZmSRO3_P001;Parent=transcript:ZmSRO3;protein_id=ZmSRO3_P001
4	ensembl	CDS	188297552	188297758	.	-	2	ID=CDS:ZmSRO3_P001;Parent=transcript:ZmSRO3;protein_id=ZmSRO3_P001
4	ensembl	CDS	188297827	188298381	.	-	2	ID=CDS:ZmSRO3_P001;Parent=transcript:ZmSRO3;protein_id=ZmSRO3_P001
4	ensembl	CDS	188298460	188298547	.	-	0	ID=CDS:ZmSRO3_P001;Parent=transcript:ZmSRO3;protein_id=ZmSRO3_P001
4	ensembl	CDS	188299279	188299374	.	-	0	ID=CDS:ZmSRO3_P001;Parent=transcript:ZmSRO3;protein_id=ZmSRO3_P001
4	ensembl	CDS	188299480	188299608	.	-	0	ID=CDS:ZmSRO3_P001;Parent=transcript:ZmSRO3;protein_id=ZmSRO3_P001
4	ensembl	CDS	188299719	188299798	.	-	2	ID=CDS:ZmSRO3_P001;Parent=transcript:ZmSRO3;protein_id=ZmSRO3_P001
4	ensembl	CDS	188299879	188300120	.	-	1	ID=CDS:ZmSRO3_P001;Parent=transcript:ZmSRO3;protein_id=ZmSRO3_P001
4	ensembl	CDS	188300213	188301165	.	-	0	ID=CDS:ZmSRO3_P001;Parent=transcript:ZmSRO3;protein_id=ZmSRO3_P001
4	ensembl	five_prime_UTR	188301166	188301196	.	-	.	Parent=transcript:ZmSRO3
4	ensembl	five_prime_UTR	188302824	188303415	.	-	.	Parent=transcript:ZmSRO3
4	ensembl	mRNA	188296864	188303415	.	-	.	ID=transcript:ZmSRO3;Parent=gene:ZmSRO3;biotype=protein_coding;transcript_id=ZmSRO3
4	ensembl	three_prime_UTR	188296864	188297237	.	-	.	Parent=transcript:ZmSRO3
4	ensembl	CDS	188297238	188297389	.	-	2	ID=CDS:ZmSRO3;Parent=transcript:ZmSRO3;protein_id=ZmSRO3
4	ensembl	CDS	188297552	188297758	.	-	2	ID=CDS:ZmSRO3;Parent=transcript:ZmSRO3;protein_id=ZmSRO3
4	ensembl	CDS	188297827	188298547	.	-	0	ID=CDS:ZmSRO3;Parent=transcript:ZmSRO3;protein_id=ZmSRO3
4	ensembl	CDS	188299279	188299374	.	-	0	ID=CDS:ZmSRO3;Parent=transcript:ZmSRO3;protein_id=ZmSRO3
4	ensembl	CDS	188299480	188299608	.	-	0	ID=CDS:ZmSRO3;Parent=transcript:ZmSRO3;protein_id=ZmSRO3
4	ensembl	CDS	188299719	188299798	.	-	2	ID=CDS:ZmSRO3;Parent=transcript:ZmSRO3;protein_id=ZmSRO3
4	ensembl	CDS	188299879	188300120	.	-	1	ID=CDS:ZmSRO3;Parent=transcript:ZmSRO3;protein_id=ZmSRO3
4	ensembl	CDS	188300213	188301165	.	-	0	ID=CDS:ZmSRO3;Parent=transcript:ZmSRO3;protein_id=ZmSRO3
4	ensembl	five_prime_UTR	188301166	188301269	.	-	.	Parent=transcript:ZmSRO3
4	ensembl	five_prime_UTR	188302000	188302097	.	-	.	Parent=transcript:ZmSRO3
4	ensembl	five_prime_UTR	188302824	188303415	.	-	.	Parent=transcript:ZmSRO3
4	ensembl	mRNA	188296864	188303415	.	-	.	ID=transcript:ZmSRO3;Parent=gene:ZmSRO3;biotype=protein_coding;transcript_id=ZmSRO3
4	ensembl	three_prime_UTR	188296864	188297237	.	-	.	Parent=transcript:ZmSRO3
4	ensembl	CDS	188297238	188297389	.	-	2	ID=CDS:ZmSRO3;Parent=transcript:ZmSRO3;protein_id=ZmSRO3
4	ensembl	CDS	188297552	188297758	.	-	2	ID=CDS:ZmSRO3;Parent=transcript:ZmSRO3;protein_id=ZmSRO3
4	ensembl	CDS	188297827	188298348	.	-	2	ID=CDS:ZmSRO3;Parent=transcript:ZmSRO3;protein_id=ZmSRO3
4	ensembl	CDS	188298460	188298547	.	-	0	ID=CDS:ZmSRO3;Parent=transcript:ZmSRO3;protein_id=ZmSRO3
4	ensembl	CDS	188299279	188299374	.	-	0	ID=CDS:ZmSRO3;Parent=transcript:ZmSRO3;protein_id=ZmSRO3
4	ensembl	CDS	188299480	188299608	.	-	0	ID=CDS:ZmSRO3;Parent=transcript:ZmSRO3;protein_id=ZmSRO3
4	ensembl	CDS	188299719	188299798	.	-	2	ID=CDS:ZmSRO3;Parent=transcript:ZmSRO3;protein_id=ZmSRO3
4	ensembl	CDS	188299879	188300120	.	-	1	ID=CDS:ZmSRO3;Parent=transcript:ZmSRO3;protein_id=ZmSRO3
4	ensembl	CDS	188300213	188301165	.	-	0	ID=CDS:ZmSRO3;Parent=transcript:ZmSRO3;protein_id=ZmSRO3
4	ensembl	five_prime_UTR	188301166	188301269	.	-	.	Parent=transcript:ZmSRO3
4	ensembl	five_prime_UTR	188302824	188303415	.	-	.	Parent=transcript:ZmSRO3
4	ensembl	mRNA	188296864	188303415	.	-	.	ID=transcript:ZmSRO3_T003;Parent=gene:ZmSRO3;biotype=protein_coding;transcript_id=ZmSRO3_T003
4	ensembl	three_prime_UTR	188296864	188297353	.	-	.	Parent=transcript:ZmSRO3_T003
4	ensembl	CDS	188297354	188297385	.	-	2	ID=CDS:ZmSRO3;Parent=transcript:ZmSRO3_T003;protein_id=ZmSRO3
4	ensembl	CDS	188297552	188297758	.	-	2	ID=CDS:ZmSRO3;Parent=transcript:ZmSRO3_T003;protein_id=ZmSRO3
4	ensembl	CDS	188297827	188298348	.	-	2	ID=CDS:ZmSRO3;Parent=transcript:ZmSRO3_T003;protein_id=ZmSRO3
4	ensembl	CDS	188298460	188298547	.	-	0	ID=CDS:ZmSRO3;Parent=transcript:ZmSRO3_T003;protein_id=ZmSRO3
4	ensembl	CDS	188299279	188299374	.	-	0	ID=CDS:ZmSRO3;Parent=transcript:ZmSRO3_T003;protein_id=ZmSRO3
4	ensembl	CDS	188299480	188299608	.	-	0	ID=CDS:ZmSRO3;Parent=transcript:ZmSRO3_T003;protein_id=ZmSRO3
4	ensembl	CDS	188299719	188299798	.	-	2	ID=CDS:ZmSRO3;Parent=transcript:ZmSRO3_T003;protein_id=ZmSRO3
4	ensembl	CDS	188299879	188300120	.	-	1	ID=CDS:ZmSRO3;Parent=transcript:ZmSRO3_T003;protein_id=ZmSRO3
4	ensembl	CDS	188300213	188301165	.	-	0	ID=CDS:ZmSRO3;Parent=transcript:ZmSRO3_T003;protein_id=ZmSRO3
4	ensembl	five_prime_UTR	188301166	188301196	.	-	.	Parent=transcript:ZmSRO3_T003
4	ensembl	five_prime_UTR	188302824	188303415	.	-	.	Parent=transcript:ZmSRO3_T003
4	ensembl	mRNA	188296899	188303104	.	-	.	ID=transcript:ZmSRO3_T005;Parent=gene:ZmSRO3;biotype=protein_coding;transcript_id=ZmSRO3_T005
4	ensembl	three_prime_UTR	188296899	188297237	.	-	.	Parent=transcript:ZmSRO3_T005
4	ensembl	CDS	188297238	188297389	.	-	2	ID=CDS:ZmSRO3_P005;Parent=transcript:ZmSRO3_T005;protein_id=ZmSRO3_P005
4	ensembl	CDS	188297552	188297758	.	-	2	ID=CDS:ZmSRO3_P005;Parent=transcript:ZmSRO3_T005;protein_id=ZmSRO3_P005
4	ensembl	CDS	188297827	188298547	.	-	0	ID=CDS:ZmSRO3_P005;Parent=transcript:ZmSRO3_T005;protein_id=ZmSRO3_P005
4	ensembl	CDS	188299279	188299374	.	-	0	ID=CDS:ZmSRO3_P005;Parent=transcript:ZmSRO3_T005;protein_id=ZmSRO3_P005
4	ensembl	exon	188299480	188299608	.	-	.	Parent=transcript:ZmSRO3_T005;Name=ZmSRO3.exon5;constitutive=1;ensembl_end_phase=0;ensembl_phase=0;exon_id=ZmSRO3.exon5;rank=6
4	ensembl	CDS	188299480	188299608	.	-	0	ID=CDS:ZmSRO3_P005;Parent=transcript:ZmSRO3_T005;protein_id=ZmSRO3_P005
4	ensembl	CDS	188299719	188299798	.	-	2	ID=CDS:ZmSRO3_P005;Parent=transcript:ZmSRO3_T005;protein_id=ZmSRO3_P005
4	ensembl	CDS	188299879	188300120	.	-	1	ID=CDS:ZmSRO3_P005;Parent=transcript:ZmSRO3_T005;protein_id=ZmSRO3_P005
4	ensembl	CDS	188300213	188301165	.	-	0	ID=CDS:ZmSRO3_P005;Parent=transcript:ZmSRO3_T005;protein_id=ZmSRO3_P005
4	ensembl	five_prime_UTR	188301166	188301269	.	-	.	Parent=transcript:ZmSRO3_T005
4	ensembl	five_prime_UTR	188302000	188302137	.	-	.	Parent=transcript:ZmSRO3_T005
4	ensembl	five_prime_UTR	188302824	188303104	.	-	.	Parent=transcript:ZmSRO3_T005
5	ensembl	mRNA	1171399	1176689	.	+	.	ID=transcript:ZmSRO4;Parent=gene:ZmSRO4;biotype=protein_coding;transcript_id=ZmSRO4
5	ensembl	five_prime_UTR	1171399	1171750	.	+	.	Parent=transcript:ZmSRO4
5	ensembl	five_prime_UTR	1173479	1173640	.	+	.	Parent=transcript:ZmSRO4
5	ensembl	CDS	1173641	1174241	.	+	0	ID=CDS:ZmSRO4;Parent=transcript:ZmSRO4;protein_id=ZmSRO4
5	ensembl	CDS	1174323	1174710	.	+	2	ID=CDS:ZmSRO4;Parent=transcript:ZmSRO4;protein_id=ZmSRO4
5	ensembl	CDS	1174930	1175171	.	+	1	ID=CDS:ZmSRO4;Parent=transcript:ZmSRO4;protein_id=ZmSRO4
5	ensembl	CDS	1175248	1175324	.	+	2	ID=CDS:ZmSRO4;Parent=transcript:ZmSRO4;protein_id=ZmSRO4
5	ensembl	CDS	1175774	1175944	.	+	0	ID=CDS:ZmSRO4;Parent=transcript:ZmSRO4;protein_id=ZmSRO4
5	ensembl	CDS	1176045	1176146	.	+	0	ID=CDS:ZmSRO4;Parent=transcript:ZmSRO4;protein_id=ZmSRO4
5	ensembl	CDS	1176316	1176396	.	+	0	ID=CDS:ZmSRO4;Parent=transcript:ZmSRO4;protein_id=ZmSRO4
5	ensembl	three_prime_UTR	1176397	1176689	.	+	.	Parent=transcript:ZmSRO4
5	ensembl	mRNA	1171399	1176689	.	+	.	ID=transcript:ZmSRO4;Parent=gene:ZmSRO4;biotype=protein_coding;transcript_id=ZmSRO4
5	ensembl	exon	1171399	1171750	.	+	.	Parent=transcript:ZmSRO4;Name=ZmSRO4.exon1;constitutive=0;ensembl_end_phase=-1;ensembl_phase=-1;exon_id=ZmSRO4.exon1;rank=1
5	ensembl	five_prime_UTR	1171399	1171750	.	+	.	Parent=transcript:ZmSRO4
5	ensembl	five_prime_UTR	1173479	1173640	.	+	.	Parent=transcript:ZmSRO4
5	ensembl	CDS	1173641	1174710	.	+	0	ID=CDS:ZmSRO4;Parent=transcript:ZmSRO4;protein_id=ZmSRO4
5	ensembl	CDS	1174930	1175171	.	+	1	ID=CDS:ZmSRO4;Parent=transcript:ZmSRO4;protein_id=ZmSRO4
5	ensembl	CDS	1175248	1175324	.	+	2	ID=CDS:ZmSRO4;Parent=transcript:ZmSRO4;protein_id=ZmSRO4
5	ensembl	CDS	1175774	1175944	.	+	0	ID=CDS:ZmSRO4;Parent=transcript:ZmSRO4;protein_id=ZmSRO4
5	ensembl	CDS	1176045	1176146	.	+	0	ID=CDS:ZmSRO4;Parent=transcript:ZmSRO4;protein_id=ZmSRO4
5	ensembl	CDS	1176316	1176396	.	+	0	ID=CDS:ZmSRO4;Parent=transcript:ZmSRO4;protein_id=ZmSRO4
5	ensembl	three_prime_UTR	1176397	1176689	.	+	.	Parent=transcript:ZmSRO4
5	ensembl	mRNA	1171405	1176689	.	+	.	ID=transcript:ZmSRO4;Parent=gene:ZmSRO4;biotype=protein_coding;transcript_id=ZmSRO4
5	ensembl	five_prime_UTR	1171405	1171750	.	+	.	Parent=transcript:ZmSRO4
5	ensembl	five_prime_UTR	1172949	1173155	.	+	.	Parent=transcript:ZmSRO4
5	ensembl	five_prime_UTR	1173479	1173640	.	+	.	Parent=transcript:ZmSRO4
5	ensembl	CDS	1173641	1174710	.	+	0	ID=CDS:ZmSRO4;Parent=transcript:ZmSRO4;protein_id=ZmSRO4
5	ensembl	CDS	1174930	1175171	.	+	1	ID=CDS:ZmSRO4;Parent=transcript:ZmSRO4;protein_id=ZmSRO4
5	ensembl	CDS	1175248	1175324	.	+	2	ID=CDS:ZmSRO4;Parent=transcript:ZmSRO4;protein_id=ZmSRO4
5	ensembl	CDS	1175774	1175944	.	+	0	ID=CDS:ZmSRO4;Parent=transcript:ZmSRO4;protein_id=ZmSRO4
5	ensembl	CDS	1176045	1176146	.	+	0	ID=CDS:ZmSRO4;Parent=transcript:ZmSRO4;protein_id=ZmSRO4
5	ensembl	CDS	1176316	1176396	.	+	0	ID=CDS:ZmSRO4;Parent=transcript:ZmSRO4;protein_id=ZmSRO4
5	ensembl	three_prime_UTR	1176397	1176689	.	+	.	Parent=transcript:ZmSRO4
5	ensembl	mRNA	1171470	1176707	.	+	.	ID=transcript:ZmSRO4;Parent=gene:ZmSRO4;biotype=protein_coding;transcript_id=ZmSRO4
5	ensembl	five_prime_UTR	1171470	1171750	.	+	.	Parent=transcript:ZmSRO4
5	ensembl	five_prime_UTR	1172827	1173155	.	+	.	Parent=transcript:ZmSRO4
5	ensembl	five_prime_UTR	1173479	1173640	.	+	.	Parent=transcript:ZmSRO4
5	ensembl	CDS	1173641	1174710	.	+	0	ID=CDS:ZmSRO4;Parent=transcript:ZmSRO4;protein_id=ZmSRO4
5	ensembl	CDS	1174930	1175171	.	+	1	ID=CDS:ZmSRO4;Parent=transcript:ZmSRO4;protein_id=ZmSRO4
5	ensembl	CDS	1175248	1175324	.	+	2	ID=CDS:ZmSRO4;Parent=transcript:ZmSRO4;protein_id=ZmSRO4
5	ensembl	CDS	1175774	1175944	.	+	0	ID=CDS:ZmSRO4;Parent=transcript:ZmSRO4;protein_id=ZmSRO4
5	ensembl	CDS	1176045	1176146	.	+	0	ID=CDS:ZmSRO4;Parent=transcript:ZmSRO4;protein_id=ZmSRO4
5	ensembl	CDS	1176316	1176396	.	+	0	ID=CDS:ZmSRO4;Parent=transcript:ZmSRO4;protein_id=ZmSRO4
5	ensembl	three_prime_UTR	1176397	1176707	.	+	.	Parent=transcript:ZmSRO4
5	ensembl	gene	46226552	46231313	.	-	.	ID=gene:ZmSRO5;biotype=protein_coding;description=ZmSRO5;gene_id=ZmSRO5;logic_name=cshl_gene
5	ensembl	mRNA	46226552	46231313	.	-	.	ID=transcript:ZmSRO5;Parent=gene:ZmSRO5;biotype=protein_coding;transcript_id=ZmSRO5
5	ensembl	three_prime_UTR	46226552	46226936	.	-	.	Parent=transcript:ZmSRO5
5	ensembl	CDS	46226937	46227005	.	-	0	ID=CDS:ZmSRO5;Parent=transcript:ZmSRO5;protein_id=ZmSRO5
5	ensembl	CDS	46227274	46227369	.	-	0	ID=CDS:ZmSRO5;Parent=transcript:ZmSRO5;protein_id=ZmSRO5
5	ensembl	CDS	46227455	46227637	.	-	0	ID=CDS:ZmSRO5;Parent=transcript:ZmSRO5;protein_id=ZmSRO5
5	ensembl	CDS	46227942	46228027	.	-	2	ID=CDS:ZmSRO5;Parent=transcript:ZmSRO5;protein_id=ZmSRO5
5	ensembl	CDS	46228129	46228370	.	-	1	ID=CDS:ZmSRO5;Parent=transcript:ZmSRO5;protein_id=ZmSRO5
5	ensembl	CDS	46228657	46229771	.	-	0	ID=CDS:ZmSRO5;Parent=transcript:ZmSRO5;protein_id=ZmSRO5
5	ensembl	five_prime_UTR	46229772	46229891	.	-	.	Parent=transcript:ZmSRO5
5	ensembl	five_prime_UTR	46230871	46231313	.	-	.	Parent=transcript:ZmSRO5
5	ensembl	mRNA	46226702	46231204	.	-	.	ID=transcript:ZmSRO5;Parent=gene:ZmSRO5;biotype=protein_coding;transcript_id=ZmSRO5
5	ensembl	three_prime_UTR	46226702	46227427	.	-	.	Parent=transcript:ZmSRO5
5	ensembl	CDS	46227428	46227637	.	-	0	ID=CDS:ZmSRO5;Parent=transcript:ZmSRO5;protein_id=ZmSRO5
5	ensembl	CDS	46227942	46228027	.	-	2	ID=CDS:ZmSRO5;Parent=transcript:ZmSRO5;protein_id=ZmSRO5
5	ensembl	CDS	46228129	46228370	.	-	1	ID=CDS:ZmSRO5;Parent=transcript:ZmSRO5;protein_id=ZmSRO5
5	ensembl	CDS	46228657	46229771	.	-	0	ID=CDS:ZmSRO5;Parent=transcript:ZmSRO5;protein_id=ZmSRO5
5	ensembl	five_prime_UTR	46229772	46229948	.	-	.	Parent=transcript:ZmSRO5
5	ensembl	five_prime_UTR	46230871	46231204	.	-	.	Parent=transcript:ZmSRO5
5	ensembl	mRNA	46226702	46231204	.	-	.	ID=transcript:ZmSRO5;Parent=gene:ZmSRO5;biotype=protein_coding;transcript_id=ZmSRO5
5	ensembl	three_prime_UTR	46226702	46226936	.	-	.	Parent=transcript:ZmSRO5
5	ensembl	CDS	46226937	46227002	.	-	0	ID=CDS:ZmSRO5;Parent=transcript:ZmSRO5;protein_id=ZmSRO5
5	ensembl	CDS	46227274	46227369	.	-	0	ID=CDS:ZmSRO5;Parent=transcript:ZmSRO5;protein_id=ZmSRO5
5	ensembl	CDS	46227455	46227637	.	-	0	ID=CDS:ZmSRO5;Parent=transcript:ZmSRO5;protein_id=ZmSRO5
5	ensembl	CDS	46227942	46228027	.	-	2	ID=CDS:ZmSRO5;Parent=transcript:ZmSRO5;protein_id=ZmSRO5
5	ensembl	CDS	46228129	46228370	.	-	1	ID=CDS:ZmSRO5;Parent=transcript:ZmSRO5;protein_id=ZmSRO5
5	ensembl	CDS	46228657	46229771	.	-	0	ID=CDS:ZmSRO5;Parent=transcript:ZmSRO5;protein_id=ZmSRO5
5	ensembl	five_prime_UTR	46229772	46229948	.	-	.	Parent=transcript:ZmSRO5
5	ensembl	five_prime_UTR	46230871	46231204	.	-	.	Parent=transcript:ZmSRO5
5	ensembl	mRNA	46226702	46231204	.	-	.	ID=transcript:ZmSRO5;Parent=gene:ZmSRO5;biotype=protein_coding;transcript_id=ZmSRO5
5	ensembl	three_prime_UTR	46226702	46226936	.	-	.	Parent=transcript:ZmSRO5
5	ensembl	CDS	46226937	46227005	.	-	0	ID=CDS:ZmSRO5;Parent=transcript:ZmSRO5;protein_id=ZmSRO5
5	ensembl	CDS	46227274	46227369	.	-	0	ID=CDS:ZmSRO5;Parent=transcript:ZmSRO5;protein_id=ZmSRO5
5	ensembl	CDS	46227455	46227637	.	-	0	ID=CDS:ZmSRO5;Parent=transcript:ZmSRO5;protein_id=ZmSRO5
5	ensembl	CDS	46227942	46228027	.	-	2	ID=CDS:ZmSRO5;Parent=transcript:ZmSRO5;protein_id=ZmSRO5
5	ensembl	CDS	46228129	46228370	.	-	1	ID=CDS:ZmSRO5;Parent=transcript:ZmSRO5;protein_id=ZmSRO5
5	ensembl	CDS	46228657	46229771	.	-	0	ID=CDS:ZmSRO5;Parent=transcript:ZmSRO5;protein_id=ZmSRO5
5	ensembl	five_prime_UTR	46229772	46229948	.	-	.	Parent=transcript:ZmSRO5
5	ensembl	five_prime_UTR	46230871	46231204	.	-	.	Parent=transcript:ZmSRO5
5	ensembl	mRNA	46226702	46231220	.	-	.	ID=transcript:ZmSRO5;Parent=gene:ZmSRO5;biotype=protein_coding;transcript_id=ZmSRO5
5	ensembl	three_prime_UTR	46226702	46226936	.	-	.	Parent=transcript:ZmSRO5
5	ensembl	CDS	46226937	46227002	.	-	0	ID=CDS:ZmSRO5;Parent=transcript:ZmSRO5;protein_id=ZmSRO5
5	ensembl	CDS	46227274	46227369	.	-	0	ID=CDS:ZmSRO5;Parent=transcript:ZmSRO5;protein_id=ZmSRO5
5	ensembl	CDS	46227455	46227637	.	-	0	ID=CDS:ZmSRO5;Parent=transcript:ZmSRO5;protein_id=ZmSRO5
5	ensembl	CDS	46227942	46228027	.	-	2	ID=CDS:ZmSRO5;Parent=transcript:ZmSRO5;protein_id=ZmSRO5
5	ensembl	CDS	46228129	46228370	.	-	1	ID=CDS:ZmSRO5;Parent=transcript:ZmSRO5;protein_id=ZmSRO5
5	ensembl	CDS	46228657	46229771	.	-	0	ID=CDS:ZmSRO5;Parent=transcript:ZmSRO5;protein_id=ZmSRO5
5	ensembl	five_prime_UTR	46229772	46229891	.	-	.	Parent=transcript:ZmSRO5
5	ensembl	five_prime_UTR	46230871	46231220	.	-	.	Parent=transcript:ZmSRO5
5	ensembl	mRNA	46226718	46231204	.	-	.	ID=transcript:ZmSRO5;Parent=gene:ZmSRO5;biotype=protein_coding;transcript_id=ZmSRO5
5	ensembl	three_prime_UTR	46226718	46227356	.	-	.	Parent=transcript:ZmSRO5
5	ensembl	CDS	46227357	46227383	.	-	0	ID=CDS:ZmSRO5;Parent=transcript:ZmSRO5;protein_id=ZmSRO5
5	ensembl	CDS	46227455	46227637	.	-	0	ID=CDS:ZmSRO5;Parent=transcript:ZmSRO5;protein_id=ZmSRO5
5	ensembl	CDS	46227942	46228027	.	-	2	ID=CDS:ZmSRO5;Parent=transcript:ZmSRO5;protein_id=ZmSRO5
5	ensembl	CDS	46228129	46228370	.	-	1	ID=CDS:ZmSRO5;Parent=transcript:ZmSRO5;protein_id=ZmSRO5
5	ensembl	CDS	46228657	46229771	.	-	0	ID=CDS:ZmSRO5;Parent=transcript:ZmSRO5;protein_id=ZmSRO5
5	ensembl	five_prime_UTR	46229772	46229948	.	-	.	Parent=transcript:ZmSRO5
5	ensembl	five_prime_UTR	46230871	46231204	.	-	.	Parent=transcript:ZmSRO5
9	ensembl	mRNA	150831591	150835012	.	+	.	ID=transcript:ZmSRO6;Parent=gene:ZmSRO6;biotype=protein_coding;transcript_id=ZmSRO6
9	ensembl	five_prime_UTR	150831591	150831920	.	+	.	Parent=transcript:ZmSRO6
9	ensembl	CDS	150831921	150832783	.	+	0	ID=CDS:ZmSRO6;Parent=transcript:ZmSRO6;protein_id=ZmSRO6
9	ensembl	CDS	150833484	150833731	.	+	1	ID=CDS:ZmSRO6;Parent=transcript:ZmSRO6;protein_id=ZmSRO6
9	ensembl	CDS	150833819	150833955	.	+	2	ID=CDS:ZmSRO6;Parent=transcript:ZmSRO6;protein_id=ZmSRO6
9	ensembl	CDS	150834378	150834476	.	+	0	ID=CDS:ZmSRO6;Parent=transcript:ZmSRO6;protein_id=ZmSRO6
9	ensembl	three_prime_UTR	150834477	150835012	.	+	.	Parent=transcript:ZmSRO6
9	ensembl	mRNA	150831591	150835012	.	+	.	ID=transcript:ZmSRO6;Parent=gene:ZmSRO6;biotype=protein_coding;transcript_id=ZmSRO6
9	ensembl	five_prime_UTR	150831591	150831920	.	+	.	Parent=transcript:ZmSRO6
9	ensembl	CDS	150831921	150832783	.	+	0	ID=CDS:ZmSRO6;Parent=transcript:ZmSRO6;protein_id=ZmSRO6
9	ensembl	CDS	150833484	150833736	.	+	1	ID=CDS:ZmSRO6;Parent=transcript:ZmSRO6;protein_id=ZmSRO6
9	ensembl	three_prime_UTR	150833737	150833955	.	+	.	Parent=transcript:ZmSRO6
9	ensembl	three_prime_UTR	150834378	150835012	.	+	.	Parent=transcript:ZmSRO6

## Sheet: Table S7
Table S7 Motifs sequences of the SRO genes
NO.	Motifs consensus sequence	Core amino acid sequence	Width
1	#NAME?	CRVILGNTEVIEAGSKQFQPSCZDFDSGVDBLLAPKTYIIWPSNMNSHIL	50
2	#NAME?	IRKKCGGNANIKYAWFGSSKDEICTIISHGFST	33
3	#NAME?	EERNKEHDLIKAGFLSGMGHLGKEVEIVAIHKNSCSTILGQARLESFRIY	50
4	#NAME?	RIKFHDLLRVLSKYLHPSRMVLISKYYEDFQKNKITK	37
5	#NAME?	YPANIKGVLSAVEDENGLRHM	21
6	#NAME?	DFQAKKAVIEVEFGGFHIILDILHMVQINLISGLEKPIAWIDEAGKCFFP	50
7	#NAME?	SFDSEAESPSPALHNSFRSFKRNGMIEL	28
8	#NAME?	SNCRSHLRKSVLKNYRNFKKSGLPQRVLFYQNGEWTDFPQD	41
9	#NAME?	TEPKSGECFGIGVHL	15
10	#NAME?	RKLRQIVGDTLLKAVMKLLPN	21
11	#NAME?	PNFVVSYKCPSGLEG	15
12	#NAME?	MHGNFEIQLKRTEEFMAAEPDRITDIKLQLEIDFNGPDNCKLEEGVEESN	50
13	#NAME?	LVDAESVENMFIKGMNVICNKDEIKISKCLSKYLRNRLELFEKQVE	46
14	#NAME?	KRIKVDPPKDNQZFA	15
15	#NAME?	QVAENKQDQESPSP	14

## Sheet: Table S8
Table S8 Exon information of SRO genes
Gene Name	Gene ID	Number of exons	Interval distribution of exons (bp)
			Exon1	Exon2	Exon3	Exon4	Exon5	Exon6	Exon7	Exon8
StSRO1	PGSC0003DMT400063250	5	492	95	136	241	912
StSRO2	PGSC0003DMT400012724	4	1344	241	112	338
StSRO3	PGSC0003DMT400035056	4	366	356	238	929
StSRO4	PGSC0003DMT400035039	3	117	356	241	136	105
StSRO5	PGSC0003DMT400043197	6	451	95	164	73	241	2846
StSRO6	PGSC0003DMT400038368	8	621	95	170	97	241	1228	118	313
AtRCD1	AT1G32230	8	250	122	1237	247	79	158	95	386
AtSRO1	AT2G35510	7	308	102	1215	234	79	167	315
AtSRO2	AT1G23550	5	671	238	130	134	238
AtSRO3	AT1G70440	5	579	238	118	107	183
AtSRO4	AT3G47720	5	125	480	247	109	279
AtSRO5	AT5G62520	4	584	244	118	750
CaSRO1	T459_00928	1	302
CaSRO2	T459_03742	5	1117	241	97	161	242
CaSRO3	T459_10290	5	538	241	136	95	95
CaSRO4	T459_12883	4	1063	241	118	47
CaSRO5	T459_17068	6	1090	241	64	164	95	101
ZmSRO1	GRMZM2G122543	4	1130	247	136	448
ZmSRO2	GRMZM2G089147	7	278	457	61	66	118	176	246
ZmSRO3	GRMZM2G011469	7	278	457	61	66	118	176	246
ZmSRO4	GRMZM2G072894	8	353	206	1231	241	76	170	101	375
ZmSRO5	GRMZM2G145236	7	366	1291	241	85	182	95	364
ZmSRO6	GRMZM2G177878	4	1192	247	136	634
SolySRO1	Solyc03g114360	4	556	462	95	1138
SolySRO2	Solyc05g005280	5	1432	356	238	133	316
SolySRO3	Solyc05g005290	6	952	356	210	136	105	477
SolySRO4	Solyc06g066330	7	409	1740	241	73	164	95	347
SolySRO5	Solyc08g005270	8	477	121	1268	241	97	161	95	427
SolySRO6	Solyc08g076420	8	786	118	1243	241	97	179	95	2740

## Sheet: Table S9
Table S9 qRT-PCR data of StSRO genes in different heavy metal exposure (raw data list and statistical analysis)
Treatment Tissue Time	Gene Name	Relative Expression CK 2−ΔΔCt Method	Relative Expression X1 2−ΔΔCt Method	Relative Expression X2 2−ΔΔCt Method	Relative Expression X3 2−ΔΔCt Method	AVG (average)	ANOVA (Analysis of variance)	*: p < 0.05 **: p < 0.01 (significance of difference)	*: p < 0.05 **: p < 0.01 (Includes the significance of down-regulation of expression levels)	±SD (standard deviation )	±SE (Standard error)	VAR (variance)	CV (coefficient of variation)
Cd Leaf 6h	StSRO1	1	0.341092	0.381565	0.369847	0.364168	0.35487	down		0.017004	0.00981726	0.000433703	0.0466927
	StSRO2	1	4.32589	3.15681	5.49497	4.32589	0.00019	up	**	0.95455	0.55111	1.36675	0.22066
	StSRO3	1	5.219	2.21022	3.8644	3.76454	0.00096	up	**	1.23036	0.710346	2.27066	0.326827
	StSRO4	1	3.67002	4.34694	3.27667	3.76454	0.00096	up	**	0.442017	0.255199	0.293069	0.117416
	StSRO5	1	0.923807	1.52486	2.12275	1.52381	0.44368			0.489469	0.282595	0.35937	0.321215
	StSRO6	1	0.930057	1.04578	2.00183	1.32589	0.63142			0.48029	0.277296	0.346018	0.36224
Cd Leaf 12h	StSRO1	1	0.0875256	0.07966	0.0953912	0.0875256	0.00057	down	**	0.00642222	0.00370787	6.18674e-05	0.0733753
	StSRO2	1	0.000275129	0.000175043	0.000375214	0.000275129	0.00025	down	**	8.17192e-05	4.71806e-05	1.0017e-08	0.297022
	StSRO3	1	2.93012	3.50642	2.35381	2.93012	2.1e-07	up	**	0.470551	0.271673	0.332127	0.160591
	StSRO4	1	0.214989	0.230047	0.449066	0.298034	0.00423	down	**	0.106973	0.0617606	0.0171647	0.358927
	StSRO5	1	2.45496	2.53151	2.37841	2.45496	5.6e-06	up	**	0.0625024	0.0360858	0.00585982	0.0254596
	StSRO6	1	4.32589	4.02612	4.62566	4.32589	1.9e-10	up	**	0.244761	0.141313	0.0898621	0.0565805
Cd Leaf 24h	StSRO1	1	0.461226	0.607097	0.703847	0.590723	0.71782	down		0.0997241	0.0575757	0.0149173	0.168817
	StSRO2	1	1.57276	1.29235	1.85318	1.57276	0.61386			0.228955	0.132187	0.0786307	0.145575
	StSRO3	1	0.643304	0.648795	0.637813	0.643304	0.75266	down		0.00448349	0.00258854	3.01525e-05	0.00696947
	StSRO4	1	7.55932	8.75435	6.36429	7.55932	3.8e-05	up	**	0.975737	0.563342	1.42809	0.129077
	StSRO5	1	10.2369	9.24162	11.2321	10.2369	8.6e-07	up	**	0.812602	0.469156	0.990483	0.0793801
	StSRO6	1	15.3259	18.5541	12.0977	15.3259	3.6e-09	up	**	2.63584	1.5218	10.4215	0.171986
Cd Root 6h	StSRO1	1	1.51726	1.19056	1.00876	1.23886	0.33454			0.210387	0.121467	0.0663941	0.169823
	StSRO2	1	0.00337923	0.00522628	0.00150085	0.00336879	0.00094	down	**	0.00152092	0.000878101	3.46978e-06	0.451473
	StSRO3	1	0.500182	0.00118574	0.999178	0.500182	0.05521	down		0.407429	0.235229	0.248997	0.814561
	StSRO4	1	1.05369	1.02543	1.08195	1.05369	0.8255			0.0230714	0.0133203	0.000798432	0.0218958
	StSRO5	1	3.81939	3.29436	4.34441	3.81939	1.2e-08	up	**	0.42868	0.247498	0.27565	0.112238
	StSRO6	1	1.16812	1.25701	1.07923	1.16812	0.49331			0.0725805	0.0419044	0.00790189	0.0621344
Cd Root 12h	StSRO1	1	1.15845	1.29235	1.02456	1.15845	0.72476			0.109327	0.0631201	0.0179287	0.0943733
	StSRO2	1	0.00220707	0.00130657	0.00310756	0.00220707	0.04011	down	*	0.000735253	0.000424498	8.10895e-07	0.333136
	StSRO3	1	0.312631	0.157127	0.468136	0.312631	0.14144	down		0.126969	0.0733056	0.0241817	0.40613
	StSRO4	1	0.179552	0.151774	0.20733	0.179552	0.084	down		0.0226804	0.0130946	0.000771604	0.126317
	StSRO5	1	2.05833	2.55833	1.55833	2.05833	0.0309	up	*	0.408248	0.235702	0.25	0.19834
	StSRO6	1	3.09068	1.2598	0.52146	1.62398	0.179			1.08003	0.623555	1.74969	0.665051
Cd Root 24h	StSRO1	1	2.87687	1.95884	1.67018	2.16863	0.0971			0.514479	0.297035	0.397033	0.237237
	StSRO2	1	0.00763393	0.00367001	0.0115978	0.00763393	0.1533	down		0.00323652	0.00186861	1.57126e-05	0.423966
	StSRO3	1	3.7767	1.03532	0.975813	1.92928	0.1793			1.30655	0.754336	2.5606	0.677221
	StSRO4	1	0.0240772	0.0180733	0.0300811	0.0240772	0.1598	down		0.00490217	0.00283027	3.6047e-05	0.203603
	StSRO5	1	7.62398	6.53687	8.71109	7.62398	8.5e-08	up	**	0.887622	0.512469	1.18181	0.116425
	StSRO6	1	2.62398	3.25415	1.99381	2.62398	0.027	up	*	0.514532	0.297065	0.397114	0.196088
Cd Stem 6h	StSRO1	1	2.26172	2.65737	1.86607	2.26172	0.3599			0.323049	0.186513	0.156541	0.142833
	StSRO2	1	1.23567	1.05843	1.41291	1.23567	0.8622			0.144718	0.083553	0.0314149	0.117117
	StSRO3	1	0.500481	0.00312918	0.997833	0.500481	0.7135			0.406086	0.234454	0.247359	0.811392
	StSRO4	1	1.89107	2.23457	1.54756	1.89107	0.5147			0.28047	0.16193	0.117995	0.148313
	StSRO5	1	14.624	15.6211	13.6269	14.624	7.1e-08	up	**	0.814129	0.470037	0.994208	0.0556708
	StSRO6	1	11.8637	7.72749	16	11.8637	1.1e-06	up	**	3.37724	1.94985	17.1086	0.284669
Cd Stem 12h	StSRO1	1	0.397626	0.466516	0.328736	0.397626	0.485	down		0.0562488	0.0324752	0.00474589	0.141461
	StSRO2	1	2.43568	2.08515	2.78621	2.43568	0.1094			0.286208	0.165242	0.122873	0.117507
	StSRO3	1	0.612549	0.03125	0.110721	0.251506	0.3879	down		0.257349	0.14858	0.0993424	1.02323
	StSRO4	1	0.241489	0.266093	0.216885	0.241489	0.3817	down		0.020089	0.0115984	0.000605354	0.0831883
	StSRO5	1	10.624	8.02641	13.2216	10.624	1.7e-08	up	**	2.12091	1.22451	6.74737	0.199634
	StSRO6	1	28.0646	28.7221	29.379	28.7219	1.1e-14	up	**	0.536636	0.309827	0.431967	0.0186839
Cd Stem 24h	StSRO1	1	1.06303	0.655197	1.47087	1.06303	0.9146			0.332996	0.192255	0.166329	0.313251
	StSRO2	1	1.46307	0.275476	2.65067	1.46307	0.4359			0.969669	0.559839	1.41039	0.662762
	StSRO3	1	0.125639	0.0999297	0.0597861	0.0951181	0.1394	down		0.0270986	0.0156454	0.0011015	0.284894
	StSRO4	1	0.30405	0.0314674	0.158769	0.164762	0.17	down		0.111362	0.0642948	0.0186022	0.675896
	StSRO5	1	16.624	15.6468	17.6012	16.624	1.7e-13	up	**	0.797856	0.460642	0.954861	0.0479943
	StSRO6	1	30.624	29.5698	28.6781	29.624	2e-16	up	**	0.795316	0.459176	0.948791	0.026847
Cu Leaf 6h	StSRO1	1	2.79518	0.823591	1.27899	1.63259	0.5052			0.842838	0.486613	1.06556	0.51626
	StSRO2	1	0.00117941	0.00108356	0.00127525	0.00117941	0.2985	down		7.8257e-05	4.51817e-05	9.18624e-09	0.0663527
	StSRO3	1	66.0615	63.5686	64.815	64.815	2e-16	up	**	1.0177	0.587568	1.55356	0.0157016
	StSRO4	1	3.13978	2.75108	2.41999	2.77029	0.0763			0.294169	0.169839	0.129803	0.106187
	StSRO5	1	13.8637	9.72749	12	11.8637	1.2e-08	up	**	1.69137	0.97651	4.29107	0.142566
	StSRO6	1	2.0831	2.48971	4.67649	3.0831	0.0409	up	*	1.13886	0.657521	1.94551	0.369388
Cu Leaf 12h	StSRO1	1	0.00527196	0.00522628	0.00531763	0.00527196	0.27655	down		3.7295e-05	2.15323e-05	2.08638e-09	0.00707423
	StSRO2	1	0.00498763	0.00647906	0.00349619	0.00498763	0.27642	down		0.00121775	0.000703069	2.22437e-06	0.244154
	StSRO3	1	5.09179	2.94854	7.23504	5.09179	0.00037	up	**	1.74995	1.01034	4.59351	0.343682
	StSRO4	1	0.0620694	0.0683934	0.0557455	0.0620694	0.3037	down		0.00516345	0.00298112	3.99919e-05	0.0831883
	StSRO5	1	30.7305	28.0561	27.379	28.7219	2.1e-14	up	**	1.44696	0.835401	3.14052	0.0503782
	StSRO6	1	12.5329	11.9382	13.1548	12.542	2.9e-09	up	**	0.496716	0.286779	0.37009	0.0396043
Cu Leaf 24h	StSRO1	1	0.380905	0.358489	0.403321	0.380905	0.0595	down		0.0183026	0.010567	0.000502479	0.0480504
	StSRO2	1	0.635813	0.395021	0.876606	0.635813	0.2477	down		0.196606	0.113511	0.057981	0.30922
	StSRO3	1	1.06033	1.26697	0.931066	1.08612	0.7796			0.138338	0.0798693	0.0287059	0.127369
	StSRO4	1	5.89888	7.47164	6.2737	6.54807	3.4e-11	up	**	0.670749	0.387257	0.674857	0.102435
	StSRO5	1	0.186384	0.316439	0.0563282	0.186384	0.0174	down	*	0.10619	0.0613087	0.0169144	0.569738
	StSRO6	1	1.10836	0.486327	0.303549	0.632746	0.2439	down		0.34449	0.198891	0.17801	0.544436
Cu Root 6h	StSRO1	1	2.34112	2.07053	2.61172	2.34112	0.02053	up	*	0.22094	0.12756	0.0732216	0.0943733
	StSRO2	1	0.00336357	0.00522628	0.00150085	0.00336357	0.07274	down		0.0015209	0.000878091	3.4697e-06	0.452168
	StSRO3	1	0.200182	0.301186	0.999178	0.500182	0.34699	down		0.355245	0.205101	0.189298	0.710231
	StSRO4	1	21.4843	19.5625	20.4827	20.5098	1.6e-15	up	**	0.784811	0.453111	0.923892	0.0382651
	StSRO5	1	443.964	443.036	445.526	444.175	2e-16	up	**	1.0274	0.593171	1.58333	0.00231306
	StSRO6	1	1.23117	1.22264	1.23971	1.23117	0.65953			0.00696775	0.00402283	7.28242e-05	0.00565943
Cu Root 12h	StSRO1	1	64.3726	65.0542	66.0089	65.1452	2e-16	up	**	0.671098	0.387458	0.675558	0.0103016
	StSRO2	1	0.00220707	0.00130657	0.00310756	0.00220707	0.0805	down		0.000735253	0.000424498	8.10895e-07	0.333136
	StSRO3	1	0.669057	0.957127	1.16814	0.93144	0.8988	down		0.204556	0.118101	0.0627649	0.219613
	StSRO4	1	0.179552	0.151774	0.20733	0.179552	0.1436	down		0.0226804	0.0130946	0.000771604	0.126317
	StSRO5	1	4.22044	3.34723	4.44618	4.00462	5.7e-05	up	**	0.47389	0.2736	0.336857	0.118336
	StSRO6	1	14.5232	17.22	15.4834	15.7422	1.2e-13	up	**	1.11606	0.644358	1.86839	0.0708961
Cu Root 24h	StSRO1	1	1.54704	1.48452	1.60956	1.54704	0.06576			0.051046	0.0294715	0.00390855	0.0329959
	StSRO2	1	0.00763393	0.00367001	0.0115978	0.00763393	0.00278	down	**	0.00323652	0.00186861	1.57126e-05	0.423966
	StSRO3	1	3.2767	2.03532	1.97581	2.42928	0.00013	up	**	0.599708	0.346241	0.539474	0.246867
	StSRO4	1	0.0540559	0.0180733	0.0300811	0.0340701	0.00337	down	**	0.0149582	0.00863611	0.000335621	0.439042
	StSRO5	1	1.03806	0.747425	0.0908733	0.625451	0.19329	down		0.396187	0.228739	0.235447	0.633443
	StSRO6	1	0.622726	0.692555	0.5	0.605094	0.1716	down		0.0795928	0.0459529	0.00950251	0.131538
Cu Stem 6h	StSRO1	1	1.35158	1.52626	1.17691	1.35158	0.6259			0.142623	0.0823432	0.0305118	0.105523
	StSRO2	1	79.9562	81.1452	79.8753	80.3256	2e-16	up	**	0.580514	0.33516	0.505495	0.00722701
	StSRO3	1	0.99002	1.18921	1.43854	1.20592	0.7746			0.18349	0.105938	0.0505029	0.152157
	StSRO4	1	0.349765	0.0192366	0.25	0.206334	0.2795	down		0.138425	0.0799198	0.0287423	0.67088
	StSRO5	1	13.3688	11.6709	9.97254	11.6708	4.6e-10	up	**	1.38653	0.800512	2.88369	0.118804
	StSRO6	1	2.80045	0.420448	0.646176	1.28902	0.6882			1.0727	0.619326	1.72604	0.832183
Cu Stem 12h	StSRO1	1	2.75845	4.11246	1.40444	2.75845	0.05151			1.10554	0.638284	1.83333	0.400783
	StSRO2	1	18.7956	17.4807	14.449	16.9084	1.8e-11	up	**	1.82006	1.05081	4.96892	0.107642
	StSRO3	1	0.387205	0.00442533	0.0332616	0.141631	0.31635	down		0.174046	0.100486	0.0454381	1.22887
	StSRO4	1	0.182431	0.178006	0.186856	0.182431	0.3399	down		0.00361295	0.00208594	1.95801e-05	0.0198044
	StSRO5	1	6.37534	6.36429	6.38639	6.37534	1.4e-05	up	**	0.00902034	0.00520789	0.00012205	0.00141488
	StSRO6	1	7.12544	6.00022	6.5627	6.56279	9.6e-06	up	**	0.459369	0.265217	0.316529	0.069996
Cu Stem 24h	StSRO1	1	0.356159	0.154963	0.557354	0.356159	0.0888	down		0.164275	0.0948444	0.0404796	0.461242
	StSRO2	1	0.840571	1.22264	0.458502	0.840571	0.6576	down		0.311958	0.180109	0.145977	0.371126
	StSRO3	1	2.11372	0.377763	0.76963	1.08704	0.8083			0.743391	0.429197	0.828946	0.683869
	StSRO4	1	0.181684	0.00975258	0.0354026	0.0756131	0.0199	down	*	0.0757309	0.0437233	0.00860276	1.00156
	StSRO5	1	1.41345	1.93187	0.895025	1.41345	0.2598			0.423291	0.244387	0.268763	0.299474
	StSRO6	1	0.28994	0.107321	0.222211	0.20649	0.0407	down	*	0.0753781	0.0435195	0.00852278	0.365044
Ni Leaf 6h	StSRO1	1	1.11739	1.13288	1.10191	1.11739	0.851			0.012647	0.00730177	0.000239921	0.0113183
	StSRO2	1	0.605291	0.624165	0.586417	0.605291	0.5305	down		0.0154105	0.00889724	0.000356224	0.0254596
	StSRO3	1	0.659827	0.707107	0.612547	0.659827	0.5881	down		0.0386037	0.0222879	0.00223537	0.0585058
	StSRO4	1	0.0123501	0.0188407	0.00585953	0.0123501	0.1298	down		0.00529956	0.0030597	4.2128e-05	0.429109
	StSRO5	1	11.4945	11.2356	11.7533	11.4945	8.9e-11	up	**	0.211387	0.122044	0.0670266	0.0183903
	StSRO6	1	15.0264	17.0864	18.9663	17.0264	2.8e-13	up	**	1.60903	0.928974	3.88347	0.0945023
Ni Leaf 12h	StSRO1	1	0.825077	1.31572	1.23971	1.12683	0.46885			0.215619	0.124488	0.0697373	0.191349
	StSRO2	1	0.000946264	0.00144822	0.00146997	0.00128815	4.1e-05	down	**	0.000241913	0.000139668	8.77826e-08	0.187799
	StSRO3	1	0.61241	0.429283	0.795536	0.61241	0.03914	down	*	0.149522	0.0863268	0.0335355	0.244154
	StSRO4	1	0.188073	0.196146	0.524858	0.303026	0.0011	down	**	0.156894	0.0905828	0.0369236	0.517758
	StSRO5	1	1.65752	1.97247	1.34257	1.65752	0.00173	up	**	0.257153	0.148467	0.0991913	0.155143
	StSRO6	1	0.1889	0.584882	0.666704	0.480162	0.00862	down	**	0.208644	0.120461	0.0652987	0.434529
Ni Leaf 24h	StSRO1	1	174.015	174.586	173.445	174.015	2e-16	up	**	0.465663	0.268851	0.325263	0.00267599
	StSRO2	1	75.5862	78.0135	80.4489	78.0162	2e-16	up	**	1.98517	1.14614	5.91136	0.0254456
	StSRO3	1	0.727344	0.929733	0.524956	0.727344	0.7356	down		0.16525	0.0954069	0.0409611	0.227196
	StSRO4	1	2.69902	2.63116	1.75321	2.36113	0.175			0.430755	0.248696	0.278324	0.182436
	StSRO5	1	0.0389856	0.0692817	0.0490662	0.0524445	0.2511	down		0.0125969	0.00727282	0.000238023	0.240195
	StSRO6	1	0.303931	0.52932	0.247414	0.360221	0.4324	down		0.121776	0.0703075	0.0222441	0.338059
Ni Root 6h	StSRO1	1	0.30528	0.121233	0.307786	0.244766	0.0054	down	**	0.0873573	0.0504358	0.011447	0.356901
	StSRO2	1	0.654934	0.190782	0.232451	0.359389	0.0145	down	*	0.209673	0.121055	0.0659442	0.583415
	StSRO3	1	0.500176	0.00114535	0.999206	0.500176	0.0473	down	*	0.407457	0.235245	0.249031	0.814627
	StSRO4	1	0.495015	0.547147	0.442884	0.495015	0.0453	down	*	0.0425652	0.024575	0.0027177	0.0859877
	StSRO5	1	3.17079	2.61557	3.38698	3.05778	3.6e-07	up	**	0.324907	0.187585	0.158347	0.106256
	StSRO6	1	3.7411	4	3.4822	3.7411	1e-08	up	**	0.21139	0.122046	0.0670286	0.0565048
Ni Root 12h	StSRO1	1	54.8898	55.5973	51.3929	53.96	2e-16	up	**	1.83806	1.0612	5.06769	0.0340634
	StSRO2	1	0.0330821	0.0303955	0.0847057	0.0493944	0.1978	down		0.0249929	0.0144297	0.000936968	0.505986
	StSRO3	1	1.43087	1.37371	1.48802	1.43087	0.5498			0.0466673	0.0269434	0.00326675	0.0326147
	StSRO4	1	0.0146175	0.0415214	0.113834	0.0566575	0.2011	down		0.0418951	0.0241881	0.00263279	0.739444
	StSRO5	1	0.000285076	0.000145167	4.43717e-05	0.000158205	0.1769	down		9.86985e-05	5.69836e-05	1.46121e-08	0.623865
	StSRO6	1	0.533759	0.192321	0.875197	0.533759	0.518	down		0.278783	0.160955	0.11658	0.522302
Ni Root 24h	StSRO1	1	164.062	162.076	160.048	162.062	2e-16	up	**	1.63877	0.946143	4.02834	0.010112
	StSRO2	1	0.400215	0.392292	0.186856	0.326454	0.323	down		0.0987637	0.0570213	0.0146314	0.302535
	StSRO3	1	0.676239	0.763351	0.589127	0.676239	0.6148	down		0.0711267	0.041065	0.00758851	0.10518
	StSRO4	1	0.235278	0.578344	0.244012	0.352545	0.3208	down		0.159704	0.0922053	0.0382582	0.453004
	StSRO5	1	0.204952	0.260616	0.670176	0.378581	0.3399	down		0.207437	0.119764	0.0645452	0.547932
	StSRO6	1	0.425727	0.426317	0.388234	0.413426	0.3668	down		0.0178149	0.0102854	0.000476056	0.0430909
Ni Stem 6h	StSRO1	1	3.27419	3.50642	3.04196	3.27419	0.00108	up	**	0.189617	0.109476	0.053932	0.0579127
	StSRO2	1	0.211617	0.190782	0.232451	0.211617	0.17723	down		0.0170112	0.00982144	0.000434073	0.0803869
	StSRO3	1	0.00215684	0.000511453	6.42126e-05	0.000910835	0.09333	down		0.000899778	0.000519487	1.2144e-06	0.98786
	StSRO4	1	0.495015	0.547147	0.442884	0.495015	0.37815	down		0.0425652	0.024575	0.0027177	0.0859877
	StSRO5	1	14.4539	16.2234	12.6845	14.4539	7.8e-13	up	**	1.44471	0.834104	3.13079	0.0999527
	StSRO6	1	3.48257	3.27161	3.69353	3.48257	0.00052	up	**	0.172249	0.0994477	0.0445043	0.0494602
Ni Stem 12h	StSRO1	1	8.13527	8.75435	7.51618	8.13527	1.1e-10	up	**	0.50548	0.291839	0.383265	0.0621344
	StSRO2	1	0.0593172	0.0303955	0.0584706	0.0493944	0.04113	down	*	0.0134387	0.00775885	0.000270899	0.27207
	StSRO3	1	1.43087	0.373712	2.48802	1.43087	0.32531			0.863164	0.498348	1.11758	0.603245
	StSRO4	1	0.0146175	0.0415214	0.113834	0.0566575	0.04248	down	*	0.0418951	0.0241881	0.00263279	0.739444
	StSRO5	1	3.04221	2.47942	3.605	3.04221	0.00027	up	**	0.459519	0.265303	0.316736	0.151048
	StSRO6	1	0.562063	0.326854	0.797273	0.562063	0.31771	down		0.192048	0.110879	0.0553237	0.341684
Ni Stem 24h	StSRO1	1	32.2488	33.0546	34.443	33.2488	2e-16	up	**	0.906227	0.52321	1.23187	0.0272559
	StSRO2	1	0.400215	0.392292	0.186856	0.326454	0.09056	down		0.0987637	0.0570213	0.0146314	0.302535
	StSRO3	1	0.676239	0.763351	0.589127	0.676239	0.39699	down		0.0711267	0.041065	0.00758851	0.10518
	StSRO4	1	0.235278	0.578344	0.244012	0.352545	0.10247	down		0.159704	0.0922053	0.0382582	0.453004
	StSRO5	1	2.65086	2.26577	3.03595	2.65086	0.00054	up	**	0.314426	0.181534	0.148296	0.118613
	StSRO6	1	0.0700257	0.00878952	0.0277763	0.0355305	0.02086	down	*	0.0255938	0.0147766	0.000982561	0.720332
Pb Leaf 6h	StSRO1	1	1.77826	1.89212	1.6644	1.77826	0.03756	up	*	0.0929654	0.0536736	0.0129639	0.052279
	StSRO2	1	0.0109366	0.0094859	0.0123873	0.0109366	0.01121	down	*	0.00118447	0.000683856	2.10446e-06	0.108304
	StSRO3	1	0.569235	0.358489	0.779981	0.569235	0.22429	down		0.172074	0.0993467	0.044414	0.302289
	StSRO4	1	0.00822738	0.0120904	0.0043644	0.00822738	0.01103	down	*	0.00315411	0.00182102	1.49226e-05	0.383367
	StSRO5	1	2.49566	1.04972	1.31208	1.61915	0.08901			0.62897	0.363136	0.593404	0.388456
	StSRO6	1	79.7596	80.5042	79.015	79.7596	2e-16	up	**	0.607964	0.351008	0.55443	0.00762245
Pb Leaf 12h	StSRO1	1	0.0216893	0.0197774	0.0236011	0.0216893	0.12932	down		0.00156101	0.000901252	3.65515e-06	0.0719716
	StSRO2	1	0.00128115	0.00170029	0.000862015	0.00128115	0.12214	down		0.000342226	0.000197584	1.75678e-07	0.267123
	StSRO3	1	19.9927	21.1435	19.9333	20.3565	1.8e-14	up	**	0.557058	0.321618	0.46547	0.0273651
	StSRO4	1	0.992368	1.44393	0.091823	0.842707	0.7993	down		0.562048	0.324498	0.473847	0.666955
	StSRO5	1	5.91712	4.02101	2.54912	4.16242	0.00013	up	**	1.37861	0.795942	2.85086	0.331205
	StSRO6	1	3.45313	4.01141	3.70334	3.72263	0.00051	up	**	0.228325	0.131824	0.0781985	0.0613344
Pb Leaf 24h	StSRO1	1	0.58176	0.590496	0.573024	0.58176	0.4932	down		0.00713318	0.00411834	7.63234e-05	0.0122614
	StSRO2	1	2.6728	3.18215	0.726986	2.19398	0.0643			1.05796	0.610811	1.6789	0.482209
	StSRO3	1	0.50002	0.000130265	0.99991	0.50002	0.4144	down		0.408158	0.23565	0.24989	0.816284
	StSRO4	1	13.9288	12.4666	13.1977	13.1977	7.6e-12	up	**	0.596939	0.344643	0.534503	0.0452304
	StSRO5	1	2.88868	1.53688	1.11744	1.84767	0.1758			0.755763	0.43634	0.856767	0.409037
	StSRO6	1	2.99367	2.24486	1.75321	2.33058	0.042	up	*	0.510029	0.294465	0.390195	0.218842
Pb Root 6h	StSRO1	1	0.177497	0.219151	0.135842	0.177497	0.08	down		0.034011	0.0196363	0.00173512	0.191615
	StSRO2	1	0.0210886	0.00596195	0.00201501	0.00968852	0.0394	down	*	0.00822054	0.00474613	0.000101366	0.848483
	StSRO3	1	0.503522	0.0225614	0.984483	0.503522	0.2737	down		0.392703	0.226727	0.231323	0.779912
	StSRO4	1	1.05246	1.53688	0.25	0.946444	0.9039	down		0.530686	0.306392	0.422441	0.560715
	StSRO5	1	0.768917	0.128514	1.40932	0.768917	0.6043	down		0.522887	0.301889	0.410116	0.68003
	StSRO6	1	2.00787	0.965936	0.0827556	1.01885	0.9661			0.786816	0.454268	0.928619	0.772255
Pb Root 12h	StSRO1	1	1.6224	1.67018	1.57462	1.6224	0.08606			0.0390122	0.0225237	0.00228292	0.024046
	StSRO2	1	0.00414415	0.00248938	0.00579892	0.00414415	0.01045	down	*	0.00135112	0.000780067	2.73827e-06	0.32603
	StSRO3	1	2.58389	2.17556	3.15125	2.6369	0.00025	up	**	0.400085	0.230989	0.240102	0.151726
	StSRO4	1	0.0182639	0.0138882	0.0226397	0.0182639	0.01135	down	*	0.00357281	0.00206276	1.91474e-05	0.195621
	StSRO5	1	2.65675	4.5905	3.74037	3.66254	1.6e-06	up	**	0.791366	0.456895	0.939389	0.21607
	StSRO6	1	0.683937	0.789215	0.578659	0.683937	0.36429	down		0.0859591	0.0496285	0.0110834	0.125683
Pb Root 24h	StSRO1	1	2.4126	2	1.5874	2	0.02701	up	*	0.336886	0.194501	0.170238	0.168443
	StSRO2	1	0.0134856	0.5	0.946058	0.486514	0.22548	down		0.38084	0.219878	0.217559	0.782794
	StSRO3	1	0.619297	0.560549	0.678044	0.619297	0.3631	down		0.0479672	0.0276939	0.00345128	0.0774544
	StSRO4	1	0.037361	0.0379436	0.0367783	0.037361	0.03225	down	*	0.000475713	0.000274653	3.39454e-07	0.0127329
	StSRO5	1	2.10318	1.90528	0.164368	1.39094	0.35073			0.871073	0.502914	1.13815	0.626247
	StSRO6	1	7.611	8.04972	7.17228	7.611	1.7e-10	up	**	0.358212	0.206814	0.192474	0.047065
Pb Stem 6h	StSRO1	1	3.54303	3.83706	3.24901	3.54303	2.7e-05	up	**	0.240069	0.138604	0.0864498	0.0677581
	StSRO2	1	0.555611	1.65533	0.295248	0.835395	0.6988	down		0.589442	0.340314	0.521162	0.705584
	StSRO3	1	0.0436988	0.464161	0.0226529	0.176838	0.0683	down		0.20335	0.117404	0.0620268	1.14993
	StSRO4	1	0.0771075	0.0638133	0.0224833	0.054468	0.0396	down	*	0.0232587	0.0134284	0.000811449	0.427015
	StSRO5	1	41.8527	43.257	42.6656	42.5918	2e-16	up	**	0.575638	0.332345	0.497039	0.0135152
	StSRO6	1	3.2139	2.71698	1.63014	2.52034	0.0026	up	**	0.661348	0.38183	0.656073	0.262404
Pb Stem 12h	StSRO1	1	1.39648	1.83706	1.24901	1.49418	0.42615			0.249811	0.144229	0.0936086	0.167189
	StSRO2	1	0.895018	1.65533	1.29525	1.28186	0.64734			0.310539	0.17929	0.144651	0.242256
	StSRO3	1	0.0549808	0.00264161	0.0226529	0.0267584	0.12879	down		0.0215637	0.0124498	0.00069749	0.805866
	StSRO4	1	1.51667	0.638133	0.0224833	0.725762	0.65619	down		0.613138	0.353995	0.563907	0.84482
	StSRO5	1	5.88236	3.25696	2.66556	3.93496	0.00025	up	**	1.39803	0.807152	2.93172	0.355284
	StSRO6	1	0.182431	0.716978	0.630145	0.509851	0.42985	down		0.234219	0.135226	0.0822879	0.459387
Pb Stem 24h	StSRO1	1	4.07183	2.37113	1.13288	2.52528	0.0234	up	*	1.20476	0.69557	2.17718	0.47708
	StSRO2	1	0.132428	0.136787	0.12807	0.132428	0.1701	down		0.00355875	0.00205464	1.8997e-05	0.026873
	StSRO3	1	0.50393	0.0251248	0.982736	0.50393	0.4221	down		0.390943	0.225711	0.229255	0.775788
	StSRO4	1	0.643785	0.108819	0.171943	0.308182	0.268	down		0.238702	0.137815	0.0854679	0.774549
	StSRO5	1	1.52281	2.62079	0.424842	1.52281	0.3981			0.896491	0.517589	1.20554	0.588706
	StSRO6	1	0.625173	0.178006	0.103306	0.302162	0.2641	down		0.23043	0.133039	0.0796472	0.762605
Zn Leaf 6h	StSRO1	1	0.132902	0.888843	0.643941	0.555229	0.554	down		0.314922	0.18182	0.148764	0.567193
	StSRO2	1	0.000244352	0.000234195	0.000254508	0.000244352	0.1944	down		8.29271e-06	4.7878e-06	1.03153e-10	0.0339376
	StSRO3	1	1.23855	2.42712	1.02555	1.56374	0.4549			0.616662	0.35603	0.570408	0.394351
	StSRO4	1	0.324796	0.320856	0.328736	0.324796	0.3729	down		0.00321668	0.00185715	1.55205e-05	0.00990368
	StSRO5	1	21.8845	18.6707	18.3333	19.6295	4.1e-13	up	**	1.60047	0.924033	3.84226	0.0815339
	StSRO6	1	14.0809	15	16.1618	15.0809	1.9e-11	up	**	0.851437	0.491577	1.08742	0.056458
Zn Leaf 12h	StSRO1	1	0.00350404	0.0214928	0.0156792	0.0135587	0.3311	down		0.00749541	0.00432748	8.42718e-05	0.552812
	StSRO2	1	0.00417161	0.00390625	0.000458751	0.00284554	0.326	down		0.00169119	0.000976407	4.29017e-06	0.594329
	StSRO3	1	70.6208	75.8481	74.5986	73.6891	2e-16	up	**	2.22883	1.28682	7.45154	0.0302464
	StSRO4	1	0.011338	0.0166308	0.00604518	0.011338	0.33	down		0.00432156	0.00249505	2.80138e-05	0.381158
	StSRO5	1	9.46079	11.0043	7.91725	9.46079	5.6e-07	up	**	1.2603	0.727632	2.38252	0.133212
	StSRO6	1	0.501006	0.00652343	0.995489	0.501006	0.6185	down		0.403743	0.233101	0.244513	0.805865
Zn Leaf 24h	StSRO1	1	0.985366	0.438303	0.681444	0.701704	0.682	down		0.223797	0.129209	0.0751274	0.318933
	StSRO2	1	0.392731	0.82932	1.05359	0.758545	0.7399	down		0.274395	0.158422	0.112939	0.361738
	StSRO3	1	1.20368	2.06869	3.9535	2.40862	0.0682			1.14806	0.662831	1.97705	0.476644
	StSRO4	1	16.9103	18.9433	19.9042	18.5859	6.2e-13	up	**	1.2481	0.720592	2.33664	0.0671531
	StSRO5	1	2.95856	1.58008	2.28505	2.27456	0.0955			0.56281	0.324939	0.475133	0.247437
	StSRO6	1	4.24728	3.31728	3.12718	3.56392	0.0029	up	**	0.489406	0.282558	0.359277	0.137322
Zn Root 6h	StSRO1	1	0.157079	0.120856	0.196146	0.158027	0.09919	down		0.0307441	0.0177501	0.0014178	0.19455
	StSRO2	1	0.000294801	0.000509158	0.000798467	0.000534142	0.0547	down		0.000206378	0.000119153	6.3888e-08	0.386374
	StSRO3	1	0.489955	0.0105253	0.992731	0.497737	0.30997	down		0.401022	0.23153	0.241227	0.80569
	StSRO4	1	1.56862	1.06437	1.52098	1.38465	0.43328			0.227309	0.131237	0.0775039	0.164163
	StSRO5	1	2.16222	1.51572	2.61557	2.09784	0.03716	up	*	0.451316	0.260568	0.30553	0.215134
	StSRO6	1	7.79794	6.77916	5.16609	6.58106	1.3e-08	up	**	1.08354	0.625583	1.76109	0.164645
Zn Root 12h	StSRO1	1	2.01977	2.17347	1.86607	2.01977	0.00353	up	**	0.125497	0.0724558	0.0236243	0.0621344
	StSRO2	1	1.4538	1.42405	0.779165	1.219	0.46466			0.311251	0.179701	0.145316	0.255332
	StSRO3	1	2.54123	2.07179	3.01066	2.54123	0.00011	up	**	0.38329	0.221292	0.220366	0.150829
	StSRO4	1	0.123085	0.0277763	0.218393	0.123085	0.00936	down	**	0.077819	0.0449288	0.0090837	0.632239
	StSRO5	1	1.08734	0.594604	1.58008	1.08734	0.76873			0.40232	0.23228	0.242792	0.370003
	StSRO6	1	0.5	2.32831e-10	1	0.5	0.10815	down		0.408248	0.235702	0.25	0.816497
Zn Root 24h	StSRO1	1	1.03726	2.44528	1.63203	1.70486	0.3085			0.577123	0.333202	0.499607	0.338517
	StSRO2	1	0.00133409	0.000891222	0.00124469	0.00115667	0.1565	down		0.000191214	0.000110397	5.48442e-08	0.165315
	StSRO3	1	0.504934	0.031395	0.978474	0.504934	0.4702	down		0.386643	0.223229	0.22424	0.76573
	StSRO4	1	0.0357418	0.00213729	0.0265527	0.0214772	0.1645	down		0.0141806	0.00818719	0.000301635	0.660263
	StSRO5	1	0.458039	0.363493	0.500156	0.440563	0.4157	down		0.0571446	0.0329924	0.00489825	0.129708
	StSRO6	1	3.95696	2.37841	0.0120068	2.1158	0.1165			1.62119	0.935996	3.9424	0.766233
Zn Stem 6h	StSRO1	1	1.06313	0.562529	1.56374	1.06313	0.86929			0.408742	0.235987	0.250605	0.384469
	StSRO2	1	9.62551	8.36814	8.10378	8.69914	8e-12	up	**	0.663872	0.383287	0.661089	0.0763146
	StSRO3	1	0.0464563	0.0587202	0.0601155	0.0550973	0.02505	down	*	0.00613663	0.00354298	5.64873e-05	0.111378
	StSRO4	1	0.060959	0.0483614	0.0735567	0.060959	0.02582	down	*	0.0102859	0.00593858	0.0001587	0.168735
	StSRO5	1	1.45238	2.96905	2.18307	2.2015	0.00655	up	**	0.619313	0.357561	0.575323	0.281314
	StSRO6	1	0.236869	0.185565	0.288172	0.236869	0.06227	down		0.0418888	0.0241845	0.00263201	0.176844
Zn Stem 12h	StSRO1	1	1.72789	1.94531	1.51047	1.72789	0.26075			0.177522	0.102492	0.0472709	0.102739
	StSRO2	1	2.74079	3.73307	1.06992	2.51459	0.02866	up	*	1.09893	0.634466	1.81146	0.43702
	StSRO3	1	2.56619	0.017337	1.57462	1.38605	0.5442			1.04907	0.605682	1.65083	0.756881
	StSRO4	1	0.050227	0.316439	0.164938	0.177202	0.20644	down		0.109026	0.0629462	0.01783	0.615266
	StSRO5	1	2.79165	3.25351	3.83706	3.29407	0.00241	up	**	0.427749	0.246961	0.274454	0.129854
	StSRO6	1	0.500341	0.00221997	0.998462	0.500341	0.43454	down		0.406714	0.234817	0.248125	0.812874
Zn Stem 24h	StSRO1	1	0.632849	0.251739	1.01396	0.632849	0.72015	down		0.311175	0.179657	0.145245	0.491705
	StSRO2	1	157.032	158.258	155.806	157.032	2e-16	up	**	1.00098	0.577918	1.50295	0.00637438
	StSRO3	1	0.716785	0.6249	0.648465	0.663383	0.74247	down		0.038967	0.0224976	0.00227764	0.0587398
	StSRO4	1	0.925867	0.0308198	0.888843	0.615176	0.70735	down		0.413479	0.238722	0.256447	0.672131
	StSRO5	1	2.32409	8.05564	4.5223	4.96734	0.00145	up	**	2.36096	1.3631	8.36123	0.475297
	StSRO6	1	1.36608	0.532185	0.280292	0.726186	0.78912	down		0.464014	0.267898	0.322963	0.638973

[truncated: 9 more sheets: Table S10, Table S11, Table S12a, Table S12b, Table S12c, Table S12d, Table S12e, Table S13a, Table S13b]
